# Supplementary material for: Differential expression of genes in milk of dairy cattle during lactation
Source: PubMed Central journal article supplement — Anim Genet. 2015 Dec 22;47(2):174–80. doi: 10.1111/age.12394 (PMC5064620; doi:10.1111/age.12394), 2015-12-22
Supplement: AGE-47-174-s003.pdf [file AGE-47-174-s003.pdf]

Table S3 Details of differentially expressed genes between H10 and L10

| Gene       | Location              | Value_1(H10) | Value_2(L10) | log2(fold_change) | Test_stat | p_value  | q_value    |
|------------|-----------------------|--------------|--------------|-------------------|-----------|----------|------------|
| C1H21ORF91 | 1:18719634-18748457   | 38.1894      | 80.9132      | 1.0832            | 1.78089   | 0.002    | 0.0280894  |
| BTG3       | 1:18909511-18928469   | 20.5756      | 53.8994      | 1.38933           | 2.4759    | 5.00E-05 | 0.00168949 |
| SAMSN1     | 1:22123654-22192158   | 167.789      | 597.405      | 1.83206           | 2.42434   | 5.00E-05 | 0.00168949 |
| BT.97089   | 1:30300549-30304847   | 79.6089      | 219.924      | 1.46601           | 2.01779   | 0.00065  | 0.0121886  |
| BT.68839   | 1:46543384-46554479   | 46.1082      | 130.713      | 1.5033            | 2.26484   | 0.0003   | 0.00696807 |
| ALCAM      | 1:50332249-50560514   | 21.8245      | 54.2276      | 1.31308           | 2.3399    | 0.0001   | 0.00298488 |
| PVRL3      | 1:56308223-56444123   | 0.586497     | 3.05242      | 2.37976           | 2.31644   | 0.00045  | 0.00945137 |
| ATP13A4    | 1:74487193-74630220   | 2.04433      | 7.52853      | 1.88074           | 2.58782   | 5.00E-05 | 0.00168949 |
| MB21D2     | 1:75101341-75222153   | 7.22273      | 21.9734      | 1.60514           | 2.45007   | 5.00E-05 | 0.00168949 |
| CLDN1      | 1:77596385-77611958   | 2.79121      | 8.04733      | 1.52762           | 2.5405    | 0.004    | 0.0464538  |
| BCL6       | 1:80179481-80202388   | 78.4951      | 227.006      | 1.53206           | 1.99962   | 0.0002   | 0.00512801 |
| EHHADH     | 1:82467816-82521151   | 3.81711      | 12.7643      | 1.74156           | 2.41136   | 0.0001   | 0.00298488 |
| MCF2L2     | 1:84268486-84525526   | 0.401387     | 7.20205      | 4.16534           | 2.46285   | 5.00E-05 | 0.00168949 |
| LAMP3      | 1:84533308-84565857   | 6.3059       | 15.6897      | 1.31505           | 1.64502   | 0.0027   | 0.0347754  |
| TNIK       | 1:96789066-97194010   | 4.67764      | 11.98        | 1.35678           | 2.3166    | 0.0003   | 0.00696807 |
| BT.53231   | 1:111318105-111331833 | 61.2331      | 283.016      | 2.2085            | 3.02366   | 5.00E-05 | 0.00168949 |
| BT.87114   | 1:126040088-126704342 | 16.9666      | 5.86014      | -1.53369          | -2.90438  | 5.00E-05 | 0.00168949 |
| BT.29337   | 1:143990450-144062807 | 0.570298     | 10.4614      | 4.19722           | 4.70646   | 5.00E-05 | 0.00168949 |
| PDXK       | 1:146490838-146516831 | 123.627      | 307.743      | 1.31573           | 1.78018   | 0.0012   | 0.0192837  |
| -          | 1:146520988-146521461 | 268.872      | 5552.13      | 4.36805           | 702.841   | 0.0002   | 0.00512801 |
| MORC3      | 1:150307547-150349311 | 17.6329      | 41.3703      | 1.23033           | 1.86064   | 0.00235  | 0.03147    |
| ETS2       | 1:152878891-152890252 | 55.1795      | 285.781      | 2.37271           | 3.13069   | 5.00E-05 | 0.00168949 |
| UBL5       | 1:154150027-154150249 | 2957.38      | 8651.83      | 1.54868           | 196.485   | 5.00E-05 | 0.00168949 |
| IFNGR2     | 1:1376826-1407269     | 183.171      | 453.868      | 1.30908           | 2.0523    | 0.0004   | 0.00870551 |
| IFNAR1     | 1:1465889-1496325     | 49.0947      | 101.962      | 1.05439           | 1.74046   | 0.0043   | 0.0488299  |
| IL10RB     | 1:1563136-1591758     | 73.7979      | 192.634      | 1.38421           | 1.98545   | 0.0014   | 0.0216421  |
| IFNAR2     | 1:1593294-1657759     | 32.3036      | 111.834      | 1.79159           | 2.77507   | 5.00E-05 | 0.00168949 |
| BT.84482   | 1:6145642-6201220     | 30.2084      | 64.0289      | 1.08377           | 1.719     | 0.00225  | 0.0305452  |
| -          | 1:6288606-6342386     | 522.935      | 9457.15      | 4.1767            | 968.688   | 0.00205  | 0.0286751  |
| -          | 1:22033565-22042017   | 0            | 538.303      | inf               | nan       | 5.00E-05 | 0.00168949 |
| IMPG2      | 1:46088650-46161410   | 0.871064     | 2.47706      | 1.50778           | 2.01147   | 0.0009   | 0.015665   |
| ITGB5      | 1:69801843-69899676   | 36.5667      | 13.5528      | -1.43194          | -2.44891  | 0.0003   | 0.00696807 |
| BDH1       | 1:72572940-72608859   | 5.76093      | 21.3341      | 1.88879           | 2.70615   | 5.00E-05 | 0.00168949 |
| BT.28708   | 1:77197969-77343645   | 82.9014      | 430.358      | 2.37607           | 3.00658   | 5.00E-05 | 0.00168949 |
| -          | 1:80012048-80017294   | 37.9102      | 273.638      | 2.85161           | 97.347    | 0.00255  | 0.0334038  |
| BT.24813   | 1:80502600-80506904   | 10.3819      | 3.63666      | -1.51339          | -2.61675  | 0.0001   | 0.00298488 |
| SENP2      | 1:81992397-82210749   | 16.9318      | 51.5206      | 1.60541           | 2.41953   | 5.00E-05 | 0.00168949 |

|                |                       |          |         |           |          |          |            |
|----------------|-----------------------|----------|---------|-----------|----------|----------|------------|
| SKIL           | 1:97824478-97846046   | 16.3757  | 45.0824 | 1.46101   | 2.0394   | 0.0004   | 0.00870551 |
| BT.85209       | 1:110945723-111211551 | 65.5016  | 578.31  | 3.14224   | 3.58878  | 5.00E-05 | 0.00168949 |
| TIPARP         | 1:111830979-111856952 | 22.8993  | 60.048  | 1.39081   | 2.41491  | 5.00E-05 | 0.00168949 |
| HPS3           | 1:119940430-119985509 | 12.3803  | 5.98319 | -1.04906  | -1.90647 | 0.00215  | 0.029713   |
| CPA3           | 1:120236685-120268840 | 7.01174  | 2.43752 | -1.52436  | -1.99372 | 0.00185  | 0.0267998  |
| RASA2          | 1:128345231-128468291 | 8.89595  | 31.4818 | 1.82329   | 3.13812  | 5.00E-05 | 0.00168949 |
| -              | 1:146880467-146883339 | 1.6054   | 13.4508 | 3.06669   | 2.07809  | 0.0044   | 0.0493571  |
| S100B          | 1:148009650-148016981 | 58.0157  | 178.347 | 1.62017   | 3.07307  | 0.00015  | 0.00417103 |
| -              | 1:153127638-153129724 | 43.9477  | 575.668 | 3.71138   | 91.1663  | 5.00E-05 | 0.00168949 |
| -              | 1:153129915-153167211 | 47.4205  | 198.431 | 2.06506   | 2.36718  | 0.0001   | 0.00298488 |
| BT.32278       | 10:1467375-1761414    | 1.43494  | 5.50036 | 1.93853   | 2.2792   | 0.0002   | 0.00512801 |
| PIAS1          | 10:14878654-15004134  | 33.5941  | 78.8643 | 1.23117   | 2.32541  | 0.00065  | 0.0121886  |
| -              | 10:17380194-17382508  | 1450.75  | 10301   | 2.82791   | 417.204  | 5.00E-05 | 0.00168949 |
| CD276          | 10:20323739-20354234  | 18.6098  | 9.40093 | -0.985185 | -1.68035 | 0.00255  | 0.0334038  |
| OSGEP          | 10:26709551-26716112  | 16.9498  | 41.8611 | 1.30434   | 2.3563   | 5.00E-05 | 0.00168949 |
| -              | 10:36877987-36886550  | 98.4437  | 363.633 | 1.88511   | 2.99658  | 0.0042   | 0.0479306  |
| NUSAP1         | 10:36886725-36936265  | 5.45173  | 13.8445 | 1.34453   | 1.94308  | 0.00065  | 0.0121886  |
| RORA           | 10:48949617-49760867  | 2.82003  | 8.19765 | 1.5395    | 1.85512  | 0.0013   | 0.0203927  |
| DMXL2          | 10:58841641-59070013  | 28.7653  | 239.645 | 3.05849   | 3.44835  | 0.0007   | 0.0128987  |
| SNAPC1         | 10:74148206-74195030  | 8.67273  | 51.5388 | 2.5711    | 3.62278  | 5.00E-05 | 0.00168949 |
| SYNE2          | 10:76362022-76699213  | 1.93033  | 5.92385 | 1.61769   | 1.94162  | 0.00115  | 0.0186976  |
| KIAA0247       | 10:81708508-81800132  | 32.9369  | 144.132 | 2.12962   | 3.36381  | 5.00E-05 | 0.00168949 |
| SFRS5          | 10:81859999-81897756  | 96.5031  | 233.935 | 1.27746   | 2.84713  | 0.00115  | 0.0186976  |
| PSEN1          | 10:85006225-85073421  | 37.1254  | 77.8046 | 1.06745   | 1.91609  | 0.00195  | 0.0276684  |
| BATF           | 10:87110562-87152139  | 16.1509  | 44.5939 | 1.46523   | 2.01164  | 0.00045  | 0.00945137 |
| TRIM36         | 10:3921476-3973147    | 3.91243  | 17.1284 | 2.13025   | 3.43758  | 5.00E-05 | 0.00168949 |
| FEM1C          | 10:4264878-4335023    | 40.5924  | 101.774 | 1.32608   | 1.92159  | 0.00295  | 0.0369284  |
| HRH2           | 10:5380605-5410760    | 31.572   | 84.2876 | 1.41668   | 2.21104  | 0.00025  | 0.0060614  |
| TLE3           | 10:16901654-16949786  | 38.3436  | 113.903 | 1.57074   | 2.06096  | 0.0002   | 0.00512801 |
| ENSBTAG0000003 | 10:17200007-17319000  | 132.63   | 1683.71 | 3.66616   | 11.6106  | 5.00E-05 | 0.00168949 |
| BT.92462       | 10:20820963-20825886  | 66.2764  | 162.785 | 1.2964    | 1.79463  | 0.0012   | 0.0192837  |
| REM2           | 10:21779536-21783181  | 1.69902  | 6.58893 | 1.95534   | 1.8406   | 0.0015   | 0.0228053  |
| RNASE10        | 10:26631718-26634462  | 5.76082  | 32.896  | 2.51356   | 2.96233  | 5.00E-05 | 0.00168949 |
| PLCB2          | 10:36024407-36044699  | 21.5506  | 10.0947 | -1.09414  | -1.89221 | 0.00055  | 0.0109367  |
| C15ORF52       | 10:36066051-36074651  | 2.87274  | 0.95282 | -1.59215  | -1.61436 | 0.0014   | 0.0216421  |
| NIN            | 10:43640453-43744573  | 16.178   | 59.9273 | 1.88918   | 2.70395  | 5.00E-05 | 0.00168949 |
| TLN2           | 10:47303875-47796327  | 0.723805 | 3.77858 | 2.38417   | 3.01846  | 5.00E-05 | 0.00168949 |
| CGNL1          | 10:52835255-53002835  | 1.12041  | 3.66047 | 1.708     | 1.68256  | 0.00285  | 0.0362346  |
| bta-mir-147    | 10:65143402-65246881  | 206.594  | 886.53  | 2.10137   | 4.22649  | 5.00E-05 | 0.00168949 |
| GCH1           | 10:67576389-67631089  | 45.2047  | 97.6776 | 1.11155   | 2.98611  | 0.0012   | 0.0192837  |
| -              | 10:70824703-70838469  | 80.3434  | 333.051 | 2.05149   | 1.93413  | 0.0002   | 0.00512801 |

|                |                        |           |          |          |          |          |            |
|----------------|------------------------|-----------|----------|----------|----------|----------|------------|
| RAB15          | 10:77387905-77408370   | 2.74191   | 6.74335  | 1.29829  | 1.85012  | 0.00065  | 0.0121886  |
| MAX            | 10:77515538-77541594   | 103.506   | 224.195  | 1.11504  | 1.81797  | 0.00115  | 0.0186976  |
| TMEM229B       | 10:79685491-79733149   | 3.492     | 10.897   | 1.64181  | 2.41932  | 5.00E-05 | 0.00168949 |
| LTBP2          | 10:86186697-86294121   | 35.1811   | 12.6346  | -1.47742 | -2.2535  | 5.00E-05 | 0.00168949 |
| BT.63066       | 10:92624409-92637043   | 3.61263   | 31.0218  | 3.10216  | 2.35221  | 0.00355  | 0.042367   |
| -              | 11:816451-900420       | 1061.64   | 3449.68  | 1.70017  | 10.5488  | 0.0011   | 0.0181408  |
| ITPRIPL1       | 11:2393541-2396426     | 39.674    | 18.621   | -1.09126 | -1.93965 | 0.0007   | 0.0128987  |
| BT.45843       | 11:2526151-2537850     | 33.6271   | 151.436  | 2.17101  | 3.02287  | 5.00E-05 | 0.00168949 |
| ENSBTAG0000004 | 11:5754348-5776837     | 0.650275  | 2.83894  | 2.12623  | 1.96437  | 0.00165  | 0.0243622  |
| IL1R2          | 11:6717052-6757777     | 18.1152   | 72.4062  | 1.99892  | 2.8472   | 5.00E-05 | 0.00168949 |
| IL1R1          | 11:6813884-6929909     | 10.3678   | 20.7968  | 1.00425  | 1.79432  | 0.00265  | 0.0342912  |
| MGC152281      | 11:10196558-10203502   | 1.58698   | 0.328873 | -2.27068 | -2.65486 | 0.0028   | 0.0357634  |
| SLC4A5         | 11:10283281-10405985   | 1.27172   | 0.283439 | -2.16567 | -2.1537  | 0.0005   | 0.0101767  |
| GALM           | 11:21040424-21095033   | 37.3208   | 90.5313  | 1.27843  | 2.08142  | 0.0007   | 0.0128987  |
| EPAS1          | 11:28576346-28668899   | 4.48623   | 12.606   | 1.49054  | 2.53588  | 5.00E-05 | 0.00168949 |
| PAPOLG         | 11:43378848-43411492   | 6.08336   | 11.9415  | 0.97305  | 1.72487  | 0.00375  | 0.044144   |
| REL            | 11:43490257-43527753   | 25.3442   | 66.5215  | 1.39217  | 2.2892   | 0.0002   | 0.00512801 |
| IL1F6          | 11:46559622-46573057   | 2.7836    | 18.3092  | 2.71754  | 2.5194   | 5.00E-05 | 0.00168949 |
| IL1RN          | 11:46699020-46706152   | 618.23    | 5188.33  | 3.06905  | 2.60823  | 0.00015  | 0.00417103 |
| -              | 11:47089160-47089725   | 0         | 766.238  | inf      | nan      | 5.00E-05 | 0.00168949 |
| IGKC           | 11:47104434-47174623   | 4.1556    | 22.6329  | 2.44529  | 3.02072  | 0.0006   | 0.0116461  |
| UGP2           | 11:62243589-62299938   | 92.999    | 188.888  | 1.02224  | 1.77095  | 0.00335  | 0.0404341  |
| AFTPH          | 11:62876981-62951512   | 10.0311   | 22.8142  | 1.18544  | 2.14807  | 0.00025  | 0.0060614  |
| PLEK           | 11:66762700-66788487   | 181.487   | 962.358  | 2.4067   | 4.26818  | 5.00E-05 | 0.00168949 |
| CGREF1         | 11:72508483-72524704   | 12.3963   | 5.76487  | -1.10455 | -1.62963 | 0.0032   | 0.0392405  |
| -              | 11:78953335-78962365   | 0.699344  | 2.86215  | 2.03303  | 2.66066  | 0.0015   | 0.0228053  |
| ODC1           | 11:87175495-87182503   | 36.5694   | 82.645   | 1.17629  | 2.1163   | 0.00055  | 0.0109367  |
| ADAM17         | 11:87898073-87953717   | 45.8762   | 119.212  | 1.37771  | 2.13195  | 0.00355  | 0.042367   |
| BT.100456      | 11:92577650-92665089   | 0.770555  | 2.90043  | 1.91229  | 2.23528  | 0.00065  | 0.0121886  |
| BT.61865       | 11:98793227-98797809   | 46.2323   | 116.768  | 1.33667  | 1.64315  | 0.0039   | 0.045599   |
| -              | 11:106807826-106808485 | 340.17    | 5859.1   | 4.10635  | 389.212  | 5.00E-05 | 0.00168949 |
| BT.88795       | 11:107260652-107261718 | 957.573   | 2641.33  | 1.46381  | 3.87147  | 0.0013   | 0.0203927  |
| BCL2L11        | 11:1153682-1201980     | 80.7619   | 236.489  | 1.55003  | 2.36565  | 5.00E-05 | 0.00168949 |
| -              | 11:4023050-4138408     | 0.616004  | 3.30445  | 2.4234   | 2.10386  | 0.0011   | 0.0181408  |
| RNF149         | 11:6213472-6238791     | 17.8463   | 80.6642  | 2.52597  | 3.78579  | 5.00E-05 | 0.00168949 |
| -              | 11:9239395-9240691     | 484.404   | 1552.52  | 1.68033  | 1.75305  | 0.0016   | 0.023879   |
| XDH            | 11:14176297-14281717   | 201.708   | 366.863  | 1.81219  | 0.81841  | 0.00265  | 0.0342912  |
| CYP1B1         | 11:20493492-20499001   | 0.0851473 | 0.788314 | 3.21074  | 2.97429  | 0.00295  | 0.0369284  |
| HAAO           | 11:25187251-25202495   | 2.45438   | 7.16617  | 1.54584  | 1.77781  | 0.00185  | 0.0267998  |
| ZFP36L2        | 11:25574616-25587785   | 153.174   | 77.9413  | -0.97471 | -1.61935 | 0.004    | 0.0464538  |
| RANBP2         | 11:44509063-44570848   | 16.3921   | 39.2754  | 1.26062  | 1.9768   | 0.00185  | 0.0267998  |

|             |                        |           |          |          |          |          |            |
|-------------|------------------------|-----------|----------|----------|----------|----------|------------|
| CKAP2L      | 11:46318612-46340841   | 2.58416   | 9.11624  | 1.81874  | 2.20434  | 0.0002   | 0.00512801 |
| IL1A        | 11:46348925-46360429   | 23.2509   | 150.376  | 2.69322  | 3.60696  | 5.00E-05 | 0.00168949 |
| IL1B        | 11:46410276-46418787   | 98.0976   | 982.577  | 3.32428  | 4.1798   | 5.00E-05 | 0.00168949 |
| -           | 11:46697800-46698925   | 223.823   | 1956.54  | 3.12788  | 420.872  | 0.0007   | 0.0128987  |
| KDM3A       | 11:48248719-48305015   | 21.5532   | 70.5791  | 1.71134  | 2.46137  | 5.00E-05 | 0.00168949 |
| PELI1,VPS54 | 11:62301308-62528075   | 24.5806   | 112.728  | 2.19726  | 3.04426  | 5.00E-05 | 0.00168949 |
| -           | 11:63224599-63235473   | 0         | 1274.44  | inf      | nan      | 5.00E-05 | 0.00168949 |
| -           | 11:68326084-68383016   | 54.6393   | 385.003  | 2.81686  | 15.9219  | 5.00E-05 | 0.00168949 |
| MGC139254   | 11:68632155-68661371   | 0.59646   | 5.87141  | 3.29921  | 3.32858  | 5.00E-05 | 0.00168949 |
| PLB1        | 11:71116626-71242763   | 1.56065   | 8.98791  | 2.52583  | 3.05505  | 5.00E-05 | 0.00168949 |
| FOSL2       | 11:71329771-71349193   | 125.332   | 381.189  | 1.60475  | 2.28972  | 0.00105  | 0.0176318  |
| BT.49091    | 11:72223039-72224689   | 11.9985   | 34.3193  | 1.51617  | 3.61197  | 0.0001   | 0.00298488 |
| GRHL1       | 11:87565730-87616670   | 3.13087   | 7.70164  | 1.2986   | 1.94742  | 0.00055  | 0.0109367  |
| BT.43222    | 11:94010160-94064822   | 7.64477   | 17.5846  | 1.20177  | 2.02352  | 0.00065  | 0.0121886  |
| PTGES       | 11:100143652-100155090 | 1.22859   | 6.95201  | 2.50043  | 3.32617  | 0.0035   | 0.0418788  |
| C9ORF59     | 11:101477075-101489693 | 99.7524   | 46.7529  | -1.09329 | -1.80451 | 0.00125  | 0.0198792  |
| BT.19921    | 11:102813512-102949457 | 7.31109   | 2.74491  | -1.41333 | -1.61336 | 0.00395  | 0.045989   |
| -           | 11:104182455-104182738 | 21068.7   | 40748.3  | 0.951637 | 213.393  | 0.00275  | 0.0352551  |
| BT.25025    | 11:104417538-104424788 | 16.0871   | 41.0796  | 1.35252  | 2.22222  | 0.00035  | 0.00778905 |
| VAV2        | 11:104646645-104796229 | 1.21447   | 4.10809  | 1.75814  | 2.16023  | 0.00065  | 0.0121886  |
| UAP1L1      | 11:106156868-106161862 | 68.1865   | 30.152   | -1.17723 | -2.56001 | 0.0003   | 0.00696807 |
| C8G         | 11:106284926-106287011 | 17.6382   | 37.1687  | 1.07538  | 1.6224   | 0.00325  | 0.0397126  |
| TRAF2       | 11:106296536-106311429 | 16.3179   | 33.158   | 1.0229   | 2.11084  | 0.0027   | 0.0347754  |
| -           | 11:106803193-106806277 | 2.28578   | 18.0307  | 2.9797   | 5.69556  | 0.00065  | 0.0121886  |
| IFITM2      | 11:107191849-107203683 | 1179.34   | 4430.35  | 1.90944  | 4.28324  | 0.00165  | 0.0243622  |
| HSPH1       | 12:29820753-29844224   | 37.1616   | 117.099  | 1.65584  | 2.4326   | 5.00E-05 | 0.00168949 |
| FLT1        | 12:31648164-31850535   | 1.10485   | 16.4218  | 3.89369  | 4.13466  | 5.00E-05 | 0.00168949 |
| CRYL1       | 12:36187099-36243551   | 62.542    | 31.6911  | -0.98075 | -2.3375  | 0.00235  | 0.03147    |
| GJB2        | 12:36327360-36340957   | 2.44      | 16.9612  | 2.79729  | 3.95987  | 5.00E-05 | 0.00168949 |
| -           | 12:52158803-52174820   | 110.955   | 1163.05  | 3.38986  | 4.41717  | 0.0006   | 0.0116461  |
| IRG1        | 12:52416049-52424159   | 81.7015   | 315.736  | 1.95029  | 2.84318  | 5.00E-05 | 0.00168949 |
| SLAIN1      | 12:53188739-53240147   | 3.7406    | 10.1871  | 1.44539  | 1.88169  | 0.00115  | 0.0186976  |
| BT.25129    | 12:54923988-54993756   | 12.953    | 24.3184  | 0.908764 | 2.03369  | 0.00435  | 0.0491152  |
| BT.63792    | 12:72065147-72204484   | 10.4682   | 33.7308  | 1.68806  | 2.08063  | 0.0007   | 0.0128987  |
| BT.39059    | 12:83016758-83093936   | 10.4555   | 39.8471  | 1.93022  | 3.00788  | 5.00E-05 | 0.00168949 |
| OLFM4       | 12:10667342-10690088   | 11.3302   | 56.2798  | 2.31245  | 3.19895  | 5.00E-05 | 0.00168949 |
| KIAA0226L   | 12:16418105-16458705   | 91.6475   | 497.91   | 2.44172  | 2.82869  | 5.00E-05 | 0.00168949 |
| C12H13orf33 | 12:30021742-30039901   | 0.0887106 | 0.731772 | 3.04422  | 2.62626  | 0.00315  | 0.0387649  |
| USPL1       | 12:30210023-30234724   | 5.79873   | 12.7498  | 1.13666  | 1.93194  | 0.0011   | 0.0181408  |
| -           | 12:72208218-72227848   | 14.4785   | 49.5882  | 1.77608  | 2.60394  | 0.00065  | 0.0121886  |
| -           | 12:76666283-76681652   | 0         | 40.7776  | inf      | nan      | 0.0005   | 0.0101767  |

|              |                      |          |          |          |          |          |            |
|--------------|----------------------|----------|----------|----------|----------|----------|------------|
| -            | 12:76683161-76706797 | 0        | 1.35725  | inf      | nan      | 0.00025  | 0.0060614  |
| -            | 12:76711292-76740082 | 0        | 1.40433  | inf      | nan      | 5.00E-05 | 0.00168949 |
| DOCK9        | 12:79676458-79910003 | 0.86916  | 6.72993  | 2.9529   | 3.46766  | 5.00E-05 | 0.00168949 |
| -            | 12:83710340-83711599 | 0        | 673.956  | inf      | nan      | 5.00E-05 | 0.00168949 |
| BT.32410     | 12:88876124-89009422 | 2.87372  | 0.956971 | -1.58637 | -2.10271 | 0.0002   | 0.00512801 |
| RAB20        | 12:89182099-89212365 | 39.543   | 165.733  | 2.06736  | 4.94085  | 5.00E-05 | 0.00168949 |
| -            | 12:90591989-90595035 | 245.205  | 1593.42  | 2.70006  | 17.234   | 0.00065  | 0.0121886  |
| GRTP1        | 12:90622563-90639777 | 3.07338  | 9.73555  | 1.66344  | 1.80064  | 0.003    | 0.0373514  |
| GAS6         | 12:90821802-90850163 | 59.1286  | 23.4085  | -1.33682 | -2.68538 | 5.00E-05 | 0.00168949 |
| BT.87961     | 13:11087843-11446718 | 10.5454  | 63.9412  | 2.60013  | 11.7721  | 0.0012   | 0.0192837  |
| PRKCQ        | 13:17032506-17185063 | 1.29486  | 4.07165  | 1.65282  | 2.36565  | 0.0003   | 0.00696807 |
| PARD3        | 13:18851193-19337608 | 7.64791  | 28.0864  | 1.87674  | 2.47413  | 5.00E-05 | 0.00168949 |
| -            | 13:24682955-24812099 | 0        | 4.07129  | inf      | nan      | 5.00E-05 | 0.00168949 |
| MAP3K8       | 13:35599897-35626614 | 40.8843  | 100.004  | 1.29044  | 2.2163   | 0.0004   | 0.00870551 |
| GZF1         | 13:42406044-42414234 | 10.0152  | 34.6097  | 1.78898  | 2.89499  | 5.00E-05 | 0.00168949 |
| SYNDIG1      | 13:42791537-42894170 | 5.44819  | 14.8316  | 1.44483  | 1.96742  | 0.0005   | 0.0101767  |
| DIP2C        | 13:46886172-47177126 | 13.9411  | 6.328    | -1.13953 | -2.03386 | 0.0005   | 0.0101767  |
| CDS2         | 13:47799923-47856833 | 40.3414  | 97.7469  | 1.27679  | 2.10643  | 0.00065  | 0.0121886  |
| C13H20orf196 | 13:48206275-48394530 | 3.47375  | 13.4697  | 1.95516  | 4.44578  | 0.00065  | 0.0121886  |
| SIGLEC1      | 13:51939066-51962376 | 1.38795  | 0.476408 | -1.54268 | -1.77575 | 0.00255  | 0.0334038  |
| -            | 13:53329636-53344124 | 0        | 239.959  | inf      | nan      | 0.0005   | 0.0101767  |
| EEF1A2       | 13:54623916-54631595 | 79.2399  | 24.6397  | -1.68524 | -2.86599 | 5.00E-05 | 0.00168949 |
| LAMA5        | 13:55379958-55433278 | 6.45353  | 2.4698   | -1.38569 | -2.32481 | 5.00E-05 | 0.00168949 |
| BT.44996     | 13:62106256-62151619 | 147.162  | 518.044  | 1.81567  | 2.27142  | 0.0001   | 0.00298488 |
| MAP1LC3A     | 13:64497253-64498905 | 43.2589  | 104.736  | 1.2757   | 1.88457  | 0.00045  | 0.00945137 |
| ACSS2        | 13:64794727-64841518 | 39.3637  | 134.513  | 1.7728   | 2.62633  | 0.0001   | 0.00298488 |
| BT.24181     | 13:67874473-67910095 | 7.87428  | 17.2298  | 1.12969  | 1.72977  | 0.00405  | 0.0467594  |
| PPP1R16B     | 13:68258137-68366080 | 4.34409  | 17.8893  | 2.04197  | 2.69314  | 5.00E-05 | 0.00168949 |
| SYS1         | 13:74429640-74433440 | 40.5584  | 99.3349  | 1.2923   | 2.23392  | 5.00E-05 | 0.00168949 |
| MMP9         | 13:75436197-75473824 | 25.2257  | 106.373  | 2.07617  | 2.57922  | 0.0002   | 0.00512801 |
| BT.42498     | 13:75563517-75574215 | 25.2902  | 60.8523  | 1.26673  | 2.07172  | 0.00045  | 0.00945137 |
| EYA2         | 13:76221594-76487993 | 0.700564 | 3.04166  | 2.11827  | 2.22229  | 0.00035  | 0.00778905 |
| PTPN1        | 13:79263517-79324185 | 24.3366  | 70.8174  | 1.54098  | 3.01436  | 5.00E-05 | 0.00168949 |
| BCAS4        | 13:79479043-79536892 | 9.11293  | 29.0723  | 1.67366  | 3.4622   | 0.00045  | 0.00945137 |
| GATA3        | 13:15984601-16003439 | 5.17488  | 16.2523  | 1.65105  | 2.24808  | 5.00E-05 | 0.00168949 |
| RBM17        | 13:17486171-17509050 | 19.5174  | 41.4969  | 1.08824  | 2.01368  | 0.0007   | 0.0128987  |
| ENKUR        | 13:26050238-26115031 | 1.77965  | 9.2857   | 2.38342  | 2.79646  | 5.00E-05 | 0.00168949 |
| BT.87967     | 13:29501667-29578090 | 16.4522  | 45.3815  | 1.46382  | 2.41202  | 5.00E-05 | 0.00168949 |
| BAMBI        | 13:36326193-36333080 | 0.263439 | 1.12572  | 2.09531  | 2.33418  | 0.00255  | 0.0334038  |
| -            | 13:40553020-40555682 | 971.74   | 3273.69  | 1.75228  | 296.192  | 0.0042   | 0.0479306  |
| THBD         | 13:42217370-42221004 | 40.4903  | 373.785  | 3.20656  | 3.93068  | 5.00E-05 | 0.00168949 |

|                 |                      |         |          |          |          |          |            |
|-----------------|----------------------|---------|----------|----------|----------|----------|------------|
| GPCPD1          | 13:48075962-48150177 | 33.8051 | 102.603  | 1.60176  | 2.5563   | 0.0001   | 0.00298488 |
| TGM3            | 13:53261634-53304213 | 689.782 | 3563.33  | 2.36901  | 2.11361  | 0.00325  | 0.0397126  |
| SLCO4A1         | 13:55149363-55172499 | 26.8434 | 168.247  | 2.64794  | 3.90543  | 5.00E-05 | 0.00168949 |
| -               | 13:55172877-55209941 | 132.049 | 1172.44  | 3.15037  | 27.814   | 0.0006   | 0.0116461  |
| CASS4           | 13:60037044-60073828 | 8.55352 | 40.2887  | 2.23578  | 3.014    | 5.00E-05 | 0.00168949 |
| C13H20ORF108    | 13:60109035-60119697 | 61.6261 | 29.0173  | -1.08663 | -2.22222 | 0.0022   | 0.0300732  |
| FAM110A         | 13:60798591-60812321 | 2.99938 | 7.63399  | 1.34777  | 1.84739  | 0.0025   | 0.0331256  |
| BT.24663,ENSBTA | 13:61924321-61938236 | 9.34654 | 47.9062  | 2.35771  | 3.14927  | 5.00E-05 | 0.00168949 |
| GSS             | 13:64842137-64867355 | 16.1062 | 37.1869  | 1.20718  | 2.01172  | 0.0002   | 0.00512801 |
| -               | 13:65205393-65205638 | 119.568 | 0        | -inf     | nan      | 0.00255  | 0.0334038  |
| TGM2            | 13:67663137-67697607 | 18.2356 | 41.536   | 1.18761  | 1.94434  | 0.0019   | 0.0272104  |
| BT.72701        | 13:74484051-74486972 | 110.615 | 290.311  | 1.39205  | 7.3391   | 0.00045  | 0.00945137 |
| C20ORF123       | 13:75966597-75972943 | 15.448  | 44.1384  | 1.51462  | 2.41911  | 5.00E-05 | 0.00168949 |
| TP53RK          | 13:76083308-76087372 | 14.7074 | 29.3742  | 0.998011 | 2.20605  | 0.0025   | 0.0331256  |
| ATP9A           | 13:80167667-80263734 | 6.13504 | 24.3388  | 1.98811  | 2.7226   | 5.00E-05 | 0.00168949 |
| BT.29499        | 13:82162090-82259990 | 1.3597  | 5.31884  | 1.96783  | 2.34509  | 0.0002   | 0.00512801 |
| SLC45A4         | 14:3711836-3740304   | 15.6302 | 48.4783  | 1.633    | 2.4701   | 5.00E-05 | 0.00168949 |
| NDRG1           | 14:9109761-9165926   | 89.3046 | 243.064  | 1.44453  | 2.10961  | 0.00035  | 0.00778905 |
| SLA             | 14:9261889-9508938   | 44.4494 | 234.983  | 2.40232  | 3.58259  | 5.00E-05 | 0.00168949 |
| ANXA13          | 14:17758445-17791429 | 3.66137 | 0.302569 | -3.59705 | -2.93127 | 0.0004   | 0.00870551 |
| LYN             | 14:24847256-24932198 | 123.182 | 301.562  | 1.29166  | 1.7676   | 0.0023   | 0.0310714  |
| -               | 14:39432342-39448143 | 0       | 249.861  | inf      | nan      | 5.00E-05 | 0.00168949 |
| BT.101967       | 14:63951757-63957275 | 47.2443 | 146.417  | 1.63187  | 2.36815  | 0.0001   | 0.00298488 |
| NIPAL2          | 14:68251837-68342901 | 9.88155 | 28.484   | 1.52734  | 2.41915  | 0.00025  | 0.0060614  |
| LY6E            | 14:2624757-2628462   | 7.05044 | 17.7753  | 1.33409  | 2.581    | 0.00185  | 0.0267998  |
| DENND3          | 14:3750705-3800766   | 11.5745 | 60.7282  | 2.39142  | 3.4392   | 5.00E-05 | 0.00168949 |
| -               | 14:16161543-16181355 | 0       | 2.29486  | inf      | nan      | 5.00E-05 | 0.00168949 |
| TRIB1           | 14:16353387-16361545 | 68.6046 | 335.007  | 2.28781  | 2.94717  | 5.00E-05 | 0.00168949 |
| BT.49772        | 14:16424534-16666229 | 13.5221 | 51.0473  | 1.91652  | 2.6096   | 5.00E-05 | 0.00168949 |
| PCMTD1          | 14:22639959-22717584 | 26.6125 | 63.5154  | 1.255    | 2.02732  | 0.0009   | 0.015665   |
| CA8             | 14:27637560-27719848 | 3.72747 | 10.795   | 1.53409  | 2.0488   | 0.0015   | 0.0228053  |
| UBE2W           | 14:39233173-39295068 | 13.1742 | 33.7806  | 1.35849  | 3.40225  | 5.00E-05 | 0.00168949 |
| FABP4           | 14:46833664-46838053 | 2187.12 | 637.799  | -1.77786 | -5.04272 | 5.00E-05 | 0.00168949 |
| MED30           | 14:48940215-48959150 | 10.3438 | 24.2082  | 1.22673  | 1.74674  | 0.0029   | 0.0365009  |
| TM7SF4          | 14:62215197-62463870 | 7.83209 | 23.6413  | 1.59384  | 1.97673  | 0.002    | 0.0280894  |
| SDC2            | 14:69930852-70050653 | 17.4843 | 47.249   | 1.43422  | 2.91513  | 0.0003   | 0.00696807 |
| ESRP1           | 14:71945028-72003342 | 2.52382 | 6.31395  | 1.32294  | 1.91956  | 0.00225  | 0.0305452  |
| SNTB1           | 14:84253918-84504093 | 13.1233 | 32.9735  | 1.32918  | 1.68116  | 0.00165  | 0.0243622  |
| CASP4           | 15:3474663-3505710   | 67.4208 | 274.3    | 2.02449  | 3.05505  | 5.00E-05 | 0.00168949 |
| BT.18504        | 15:6007067-6034291   | 5.46639 | 44.6974  | 3.03153  | 3.55604  | 5.00E-05 | 0.00168949 |
| BT.102365       | 15:14156931-14556383 | 13.0641 | 29.5803  | 1.17903  | 1.58714  | 0.00175  | 0.0256741  |

|             |                      |          |         |          |          |          |            |
|-------------|----------------------|----------|---------|----------|----------|----------|------------|
| ZC3H12C     | 15:20455454-20526349 | 15.1015  | 30.9479 | 1.03515  | 1.75781  | 0.00225  | 0.0305452  |
| DIXDC1      | 15:22583431-22659906 | 10.689   | 27      | 1.33684  | 1.95086  | 0.00065  | 0.0121886  |
| UBE4A       | 15:29476789-29516720 | 88.8848  | 212.716 | 1.25892  | 1.71138  | 0.00375  | 0.044144   |
| BLR1        | 15:30007425-30018517 | 0.224292 | 2.93263 | 3.70875  | 3.68616  | 0.0034   | 0.0408591  |
| NLRX1       | 15:30278099-30296544 | 20.4209  | 10.0482 | -1.02312 | -2.08967 | 0.0019   | 0.0272104  |
| DENND5A     | 15:43965777-44058881 | 46.3787  | 178.817 | 1.94695  | 2.88152  | 5.00E-05 | 0.00168949 |
| ST5         | 15:44334646-44460360 | 1.55439  | 6.70573 | 2.10904  | 2.69949  | 5.00E-05 | 0.00168949 |
| RRP8        | 15:47082235-47095486 | 3.37758  | 11.777  | 1.80192  | 2.21888  | 5.00E-05 | 0.00168949 |
| NUP98       | 15:52097534-52183246 | 20.3112  | 43.7192 | 1.10599  | 1.80302  | 0.00335  | 0.0404341  |
| FOLR2       | 15:52602039-52605536 | 618.101  | 217.407 | -1.50744 | -2.09964 | 5.00E-05 | 0.00168949 |
| SLCO2B1     | 15:55151084-55203571 | 5.93568  | 2.72943 | -1.12082 | -1.86494 | 0.00155  | 0.0233854  |
| DGAT2,UVRAG | 15:55940756-56317353 | 30.9865  | 113.024 | 1.86691  | 2.9637   | 5.00E-05 | 0.00168949 |
| EHF         | 15:65991131-66030964 | 23.0578  | 63.9014 | 1.47059  | 2.07242  | 0.0002   | 0.00512801 |
| BT.19824    | 15:67661944-67741048 | 40.7654  | 101.447 | 1.31531  | 1.99307  | 0.00025  | 0.0060614  |
| CD82        | 15:75506623-75575746 | 165.478  | 532.368 | 1.68579  | 2.2749   | 0.00035  | 0.00778905 |
| -           | 15:78923225-79039276 | 235.203  | 957.103 | 2.02477  | 17.3197  | 5.00E-05 | 0.00168949 |
| PTPRJ       | 15:79039376-79097403 | 153.325  | 368.149 | 1.26369  | 1.90692  | 0.0022   | 0.0300732  |
| BT.22969    | 15:82158927-82172143 | 7.28837  | 17.0432 | 1.22553  | 1.7377   | 0.003    | 0.0373514  |
| FAM111A     | 15:83600424-83605727 | 3.8866   | 11.7879 | 1.60073  | 2.2222   | 0.00015  | 0.00417103 |
| BT.53744    | 15:84615939-84630983 | 0.445909 | 12.5933 | 4.81976  | 5.58751  | 5.00E-05 | 0.00168949 |
| BIRC2,BIRC3 | 15:6472731-6654015   | 57.4062  | 415.308 | 2.8549   | 3.88673  | 5.00E-05 | 0.00168949 |
| ENDOD1      | 15:15585022-15619671 | 18.0515  | 8.8306  | -1.03154 | -1.97556 | 0.0012   | 0.0192837  |
| POU2AF1     | 15:21951909-21976900 | 0.156081 | 3.20336 | 4.35921  | 4.01976  | 0.0002   | 0.00512801 |
| CADM1       | 15:26101410-26451509 | 372.011  | 159.799 | -1.21909 | -1.78016 | 0.00075  | 0.0136024  |
| PVRL1       | 15:30743666-30811477 | 14.0955  | 6.60289 | -1.09407 | -1.65933 | 0.00245  | 0.0325567  |
| STARD10     | 15:53087562-53121538 | 5.00234  | 11.9789 | 1.25983  | 1.6489   | 0.0044   | 0.0493571  |
| MUC15       | 15:57913543-58130615 | 13.1522  | 49.639  | 1.91617  | 2.67843  | 5.00E-05 | 0.00168949 |
| ELF5        | 15:65824441-65856722 | 189.273  | 557.087 | 1.55743  | 1.88651  | 0.0016   | 0.023879   |
| -           | 15:78428920-78432377 | 304.494  | 2437.52 | 3.00093  | 264.837  | 0.0001   | 0.00298488 |
| FNBP4       | 15:78675011-78717851 | 37.0068  | 140.372 | 1.92339  | 2.36602  | 0.00035  | 0.00778905 |
| -           | 15:78833189-78837562 | 0        | 690.418 | inf      | nan      | 0.00015  | 0.00417103 |
| -           | 15:79099117-79099666 | 813.524  | 2162.04 | 1.41013  | 43.1692  | 0.00015  | 0.00417103 |
| SLC43A3     | 15:81978439-81996848 | 11.3382  | 1.98865 | -2.51133 | -3.23994 | 5.00E-05 | 0.00168949 |
| -           | 15:83560843-83563249 | 0        | 300.764 | inf      | nan      | 0.00135  | 0.0210576  |
| TCN1        | 15:84361363-84434956 | 87.2315  | 406.706 | 2.22106  | 3.48621  | 5.00E-05 | 0.00168949 |
| BTG2        | 16:890071-892370     | 47.8072  | 189.566 | 1.9874   | 4.76067  | 5.00E-05 | 0.00168949 |
| SOX13       | 16:1684509-1728817   | 2.34564  | 6.14454 | 1.38932  | 1.63624  | 0.00405  | 0.0467594  |
| PCTK3       | 16:3082101-3108506   | 0.772759 | 2.26608 | 1.55211  | 1.73254  | 0.0031   | 0.0382177  |
| MFSD4       | 16:3168634-3193846   | 6.63812  | 18.0838 | 1.44585  | 2.06295  | 0.00045  | 0.00945137 |
| BT.22323    | 16:4144348-4218744   | 18.2881  | 38.1547 | 1.06095  | 1.67309  | 0.0037   | 0.0437791  |
| FAIM3       | 16:4586506-4606760   | 1.66214  | 12.0039 | 2.85239  | 2.95918  | 5.00E-05 | 0.00168949 |

|            |                      |          |         |           |          |          |            |
|------------|----------------------|----------|---------|-----------|----------|----------|------------|
| BT.30402   | 16:4998444-5005553   | 60.2519  | 24.242  | -1.3135   | -3.83006 | 0.0008   | 0.0143027  |
| 1-Mar      | 16:24976174-24998620 | 32.9421  | 90.5815 | 1.45928   | 1.93203  | 0.00075  | 0.0136024  |
| CHML       | 16:35948786-35950742 | 8.23726  | 17.6815 | 1.102     | 2.24607  | 0.00215  | 0.029713   |
| DFFA       | 16:43994267-44004665 | 48.7764  | 25.5639 | -0.932074 | -1.66952 | 0.00435  | 0.0491152  |
| BT.39199   | 16:52388691-52397907 | 32.728   | 129.706 | 1.98665   | 2.85767  | 5.00E-05 | 0.00168949 |
| SCNN1D     | 16:52595745-52599094 | 3.31947  | 50.9992 | 3.94145   | 5.85576  | 5.00E-05 | 0.00168949 |
| FLJ20584   | 16:52625533-52651239 | 2.80042  | 9.89973 | 1.82174   | 2.37601  | 5.00E-05 | 0.00168949 |
| RNF223     | 16:52655445-52657700 | 1.45885  | 5.68836 | 1.96318   | 1.77321  | 0.00285  | 0.0362346  |
| HES4       | 16:52724338-52728224 | 1.24555  | 7.05563 | 2.502     | 2.32944  | 0.0002   | 0.00512801 |
| AXDND1     | 16:62138402-62217021 | 0.835901 | 4.43292 | 2.40685   | 1.90465  | 0.0021   | 0.0292856  |
| IER5       | 16:63689679-63690654 | 140.712  | 414.765 | 1.55955   | 1.9647   | 0.00025  | 0.0060614  |
| NPL        | 16:65330450-65369036 | 14.9051  | 6.05561 | -1.29946  | -2.06246 | 0.00095  | 0.0163093  |
| C16H1ORF26 | 16:67653940-67759357 | 3.08322  | 6.33541 | 1.039     | 1.70944  | 0.00435  | 0.0491152  |
| BT.42411   | 16:72740020-72753761 | 53.329   | 261.37  | 2.2931    | 2.95517  | 5.00E-05 | 0.00168949 |
| IRF6       | 16:75401018-75417466 | 3.0106   | 9.51534 | 1.6602    | 2.22069  | 0.0003   | 0.00696807 |
| LAMB3      | 16:75564703-75610920 | 5.14543  | 187.315 | 5.18604   | 11.3608  | 5.00E-05 | 0.00168949 |
| SLC45A3    | 16:3244644-3250256   | 2.2034   | 0.58932 | -1.90261  | -2.41692 | 0.0029   | 0.0365009  |
| BT.105276  | 16:4533504-4552472   | 31.7055  | 84.5899 | 1.41575   | 1.80701  | 0.0019   | 0.0272104  |
| BT.91089   | 16:5099067-5125304   | 89.1882  | 254.956 | 1.51532   | 1.91624  | 0.001    | 0.0169155  |
| HHIPL2     | 16:26713224-26741364 | 8.4169   | 26.4181 | 1.65016   | 2.47131  | 0.00015  | 0.00417103 |
| TP53BP2    | 16:27841999-27897611 | 1.95239  | 5.15082 | 1.39956   | 1.86854  | 0.0013   | 0.0203927  |
| C16H1ORF55 | 16:29750648-29773642 | 14.7227  | 30.0644 | 1.03001   | 1.68851  | 0.0018   | 0.026296   |
| KMO        | 16:35975650-36045361 | 3.00594  | 22.7909 | 2.92257   | 1.65106  | 0.00075  | 0.0136024  |
| SELP       | 16:38049258-38080862 | 0.15102  | 1.62656 | 3.42901   | 2.64906  | 0.0003   | 0.00696807 |
| SELL       | 16:38148941-38173226 | 106.595  | 289.107 | 1.43946   | 2.07976  | 0.00065  | 0.0121886  |
| TNFRSF1B   | 16:42376257-42409768 | 190.236  | 495.213 | 1.38026   | 1.96108  | 0.0029   | 0.0365009  |
| BT.58035   | 16:44775431-44797198 | 14.873   | 7.26855 | -1.03295  | -1.66844 | 0.0022   | 0.0300732  |
| CA6        | 16:45289117-45314106 | 0.678377 | 5.67925 | 3.06554   | 3.2379   | 0.00015  | 0.00417103 |
| ARHGEF16   | 16:50811141-50834864 | 3.45648  | 8.27649 | 1.25972   | 1.87548  | 0.0033   | 0.0400404  |
| PRKCZ      | 16:51848097-51947503 | 2.17674  | 5.84563 | 1.42519   | 1.78954  | 0.00265  | 0.0342912  |
| PRDM2      | 16:55058853-55189768 | 9.72717  | 19.0261 | 0.967889  | 1.57509  | 0.0038   | 0.0446185  |
| SNORD24    | 16:56691109-56694789 | 31.5834  | 72.2906 | 1.19464   | 1.838    | 0.002    | 0.0280894  |
| STX6       | 16:63578806-63628883 | 38.5973  | 97.855  | 1.34215   | 2.02721  | 0.00085  | 0.0150217  |
| FAM129A    | 16:67296089-67499532 | 32.8325  | 121.252 | 1.88481   | 2.75981  | 5.00E-05 | 0.00168949 |
| BT.104982  | 16:69263775-69271738 | 38.3253  | 119.263 | 1.63777   | 1.94077  | 0.00215  | 0.029713   |
| FAM71A     | 16:72811910-72814133 | 2.75928  | 7.09077 | 1.36165   | 2.04728  | 0.0011   | 0.0181408  |
| ATF3       | 16:72820025-72832974 | 70.9472  | 166.644 | 1.23196   | 2.4078   | 0.00035  | 0.00778905 |
| -          | 16:72880561-72883275 | 2.2046   | 15.2683 | 2.79195   | 1.42958  | 0.00405  | 0.0467594  |
| -          | 16:72929651-72968111 | 2.74107  | 17.8763 | 2.70524   | 2.40052  | 0.00015  | 0.00417103 |
| -          | 16:73840005-73859002 | 0        | 4.16662 | inf       | nan      | 5.00E-05 | 0.00168949 |
| BT.48370   | 16:75423472-75453476 | 8.43326  | 45.8855 | 2.44388   | 3.24442  | 5.00E-05 | 0.00168949 |



|                |                      |           |          |          |          |          |            |
|----------------|----------------------|-----------|----------|----------|----------|----------|------------|
| HSD11B1        | 16:75463611-75508770 | 0.698542  | 12.7707  | 4.19235  | 6.23047  | 5.00E-05 | 0.00168949 |
| G0S2           | 16:75539495-75540425 | 112.46    | 1499.32  | 3.73682  | 3.87784  | 5.00E-05 | 0.00168949 |
| FGG            | 17:2823020-2830960   | 3.20083   | 9.47145  | 1.56514  | 2.17686  | 0.0008   | 0.0143027  |
| -              | 17:4950509-5036228   | 82.8104   | 749.083  | 3.17724  | 2.68889  | 5.00E-05 | 0.00168949 |
| LRBA           | 17:6786744-7542666   | 9.57596   | 25.6412  | 1.42097  | 1.82507  | 0.00385  | 0.0451289  |
| NR3C2          | 17:9726045-10173282  | 1.21582   | 4.39882  | 1.85518  | 2.17985  | 0.00035  | 0.00778905 |
| RILPL2         | 17:54425951-54457510 | 57.7779   | 179.552  | 1.63581  | 2.53253  | 5.00E-05 | 0.00168949 |
| ENSBTAG0000004 | 17:55053666-55054749 | 167.692   | 1507.66  | 3.16843  | 5.91217  | 5.00E-05 | 0.00168949 |
| NOS1           | 17:60047140-60131472 | 0.207751  | 0.948924 | 2.19144  | 2.07054  | 0.0043   | 0.0488299  |
| DTX1           | 17:63358581-63396162 | 0.456428  | 2.01796  | 2.14444  | 2.4517   | 0.00075  | 0.0136024  |
| TPCN1          | 17:63498279-63558939 | 27.049    | 12.9299  | -1.06487 | -1.92937 | 0.00165  | 0.0243622  |
| CMLKR1         | 17:66787278-66828139 | 96.7471   | 44.9737  | -1.10514 | -2.0406  | 0.00105  | 0.0176318  |
| TCN2           | 17:71711448-71727449 | 125.754   | 55.8961  | -1.16979 | -1.78285 | 0.00065  | 0.0121886  |
| BT.48450       | 17:72142467-72196937 | 49.7721   | 162.908  | 1.71064  | 2.31245  | 5.00E-05 | 0.00168949 |
| SGLT1          | 17:72690557-72740066 | 0.949698  | 3.89839  | 2.03734  | 2.89988  | 0.00045  | 0.00945137 |
| BT.53247       | 17:73408366-73415618 | 0.370228  | 1.68318  | 2.18471  | 2.23776  | 0.00075  | 0.0136024  |
| SNAP29         | 17:74261018-74271390 | 24.1421   | 52.9004  | 1.13173  | 2.53899  | 0.00055  | 0.0109367  |
| CRKL           | 17:74282224-74297800 | 111.229   | 332.383  | 1.57931  | 2.33627  | 0.0001   | 0.00298488 |
| KLHL22         | 17:74498663-74519770 | 7.12525   | 19.5959  | 1.45954  | 2.37024  | 5.00E-05 | 0.00168949 |
| TRIM2          | 17:4308228-4436144   | 3.98057   | 12.0532  | 1.59837  | 2.46979  | 0.0001   | 0.00298488 |
| -              | 17:4949309-4950258   | 0         | 445.462  | inf      | nan      | 0.00035  | 0.00778905 |
| TNIP3          | 17:40818366-40861705 | 2.18163   | 9.87257  | 2.17802  | 1.93339  | 0.0014   | 0.0216421  |
| HIP1R          | 17:54915865-54946127 | 41.9662   | 252.898  | 2.59125  | 2.7765   | 5.00E-05 | 0.00168949 |
| MLXIP          | 17:55468195-55528501 | 67.1663   | 842.614  | 3.64906  | 10.7203  | 5.00E-05 | 0.00168949 |
| TMEM120B       | 17:55759605-55815637 | 17.6698   | 50.9932  | 1.52902  | 1.81091  | 0.0028   | 0.0357634  |
| -              | 17:58033708-58079333 | 0         | 17.5805  | inf      | nan      | 0.00015  | 0.00417103 |
| HSPB8          | 17:58405436-58418688 | 1.13129   | 5.56719  | 2.29898  | 3.15954  | 5.00E-05 | 0.00168949 |
| SDSL           | 17:63278103-63292006 | 6.3555    | 21.627   | 1.76676  | 2.68032  | 0.0001   | 0.00298488 |
| RASAL1         | 17:63397790-63429841 | 4.86149   | 12.5545  | 1.36873  | 1.91671  | 0.0014   | 0.0216421  |
| RPH3A          | 17:63682757-63748775 | 0.0649211 | 0.648501 | 3.32035  | 2.08957  | 0.0013   | 0.0203927  |
| PXN            | 17:64817806-64859142 | 36.6398   | 139.242  | 1.92611  | 2.6126   | 5.00E-05 | 0.00168949 |
| BT.45038       | 17:71434156-71437432 | 110.403   | 922.234  | 3.06235  | 3.4106   | 5.00E-05 | 0.00168949 |
| BT.30373       | 17:72064669-72068000 | 52.4596   | 151.457  | 1.52963  | 2.10573  | 0.00015  | 0.00417103 |
| GGT5           | 17:73425745-73434932 | 13.8731   | 65.2119  | 2.23285  | 3.34356  | 5.00E-05 | 0.00168949 |
| UPB1           | 17:73500518-73527334 | 3.32742   | 13.9052  | 2.06315  | 2.53515  | 0.0005   | 0.0101767  |
| BT.56667       | 17:73576017-73590296 | 14.6529   | 69.7517  | 2.25104  | 3.51527  | 5.00E-05 | 0.00168949 |
| SLC7A4         | 17:74366169-74373743 | 8.50752   | 25.9044  | 1.60638  | 2.55916  | 5.00E-05 | 0.00168949 |
| VAT1L          | 18:5045211-5211278   | 8.24172   | 20.4525  | 1.31126  | 1.86016  | 0.0033   | 0.0400404  |
| BT.8228        | 18:10610404-10689343 | 17.9452   | 63.3691  | 1.82018  | 2.66695  | 5.00E-05 | 0.00168949 |
| CRISPLD2       | 18:10985131-11050904 | 16.4636   | 76.7594  | 2.22106  | 3.51687  | 5.00E-05 | 0.00168949 |
| BANP           | 18:13425298-13493366 | 6.95382   | 15.8414  | 1.18782  | 1.77633  | 0.0011   | 0.0181408  |

|          |                      |          |         |          |          |          |            |
|----------|----------------------|----------|---------|----------|----------|----------|------------|
| NOD2     | 18:19177561-19212607 | 10.0754  | 21.0875 | 1.06555  | 1.78834  | 0.00255  | 0.0334038  |
| CYLD     | 18:19224225-19293983 | 15.8509  | 50.5206 | 1.67231  | 2.71307  | 5.00E-05 | 0.00168949 |
| SLC6A2   | 18:23962441-24002080 | 0.341387 | 1.662   | 2.28344  | 2.44589  | 0.0004   | 0.00870551 |
| RSPRY1   | 18:25295238-25333181 | 40.5528  | 87.1788 | 1.10418  | 1.78904  | 0.0029   | 0.0365009  |
| POLR2C   | 18:25539094-25555198 | 43.7846  | 85.1248 | 0.959155 | 2.07015  | 0.0037   | 0.0437791  |
| GPR97    | 18:25726848-25753920 | 9.88627  | 28.7418 | 1.53965  | 1.79593  | 0.00205  | 0.0286751  |
| NDRG4    | 18:26340550-26383749 | 3.26721  | 7.98826 | 1.28982  | 1.70742  | 0.00395  | 0.045989   |
| PDP2     | 18:34707448-34711484 | 8.72318  | 17.4775 | 1.00257  | 1.63238  | 0.0031   | 0.0382177  |
| PLA2G15  | 18:35747166-35760966 | 47.6315  | 20.0707 | -1.24682 | -2.18705 | 0.00035  | 0.00778905 |
| ZNF507   | 18:43030188-43068295 | 0.682247 | 4.04816 | 2.5689   | 2.8242   | 5.00E-05 | 0.00168949 |
| GRAMD1A  | 18:45932690-45957100 | 17.8452  | 38.9524 | 1.12618  | 1.73452  | 0.0015   | 0.0228053  |
| HPN      | 18:45971858-45991833 | 7.27942  | 22.4263 | 1.6233   | 2.53354  | 5.00E-05 | 0.00168949 |
| CD22     | 18:46225970-46239044 | 0.454231 | 4.62128 | 3.34679  | 3.12641  | 5.00E-05 | 0.00168949 |
| GPR41    | 18:46244899-46249752 | 0.578894 | 3.6337  | 2.65007  | 1.90977  | 0.00375  | 0.044144   |
| GPR43    | 18:46312177-46314341 | 9.83095  | 107.848 | 3.45552  | 5.06679  | 5.00E-05 | 0.00168949 |
| -        | 18:46334572-46335974 | 0        | 160.479 | inf      | nan      | 0.0007   | 0.0128987  |
| RYR1     | 18:48502351-48631056 | 25.7845  | 106.285 | 2.04336  | 2.47449  | 0.00195  | 0.0276684  |
| BT.20178 | 18:48880854-48891485 | 30.3269  | 68.8094 | 1.18201  | 2.73011  | 0.00035  | 0.00778905 |
| -        | 18:49321024-49321294 | 4552.26  | 11234.4 | 1.30327  | 255.005  | 0.0005   | 0.0101767  |
| ZFP36    | 18:49335051-49375317 | 352.082  | 1304.01 | 1.88897  | 1.81213  | 0.0016   | 0.023879   |
| LTBP4    | 18:50173267-50202104 | 25.4926  | 9.90964 | -1.36318 | -2.18824 | 5.00E-05 | 0.00168949 |
| DEDD2    | 18:51380782-51395993 | 51.1612  | 173.449 | 1.76139  | 2.38913  | 5.00E-05 | 0.00168949 |
| POU2F2   | 18:51467222-51497957 | 4.12551  | 12.8829 | 1.64281  | 2.10388  | 0.0003   | 0.00696807 |
| -        | 18:52760834-52764323 | 1665.61  | 11850.2 | 2.83079  | 403.418  | 5.00E-05 | 0.00168949 |
| -        | 18:52764490-52839691 | 33.2209  | 156.6   | 2.23692  | 2.94934  | 5.00E-05 | 0.00168949 |
| BCL3     | 18:52922333-52931384 | 45.0998  | 245.254 | 2.44308  | 4.29997  | 5.00E-05 | 0.00168949 |
| RELB     | 18:53099824-53127762 | 25.2406  | 100.266 | 1.99001  | 3.00301  | 5.00E-05 | 0.00168949 |
| ARHGAP35 | 18:54425389-54497692 | 6.19956  | 25.1922 | 2.02274  | 2.43369  | 5.00E-05 | 0.00168949 |
| BT.59327 | 18:55925890-55929294 | 96.4494  | 561.708 | 2.54198  | 3.22943  | 5.00E-05 | 0.00168949 |
| BT.26763 | 18:57573529-57583637 | 3.36888  | 18.902  | 2.48819  | 3.33484  | 5.00E-05 | 0.00168949 |
| NLRP12   | 18:61091347-61147226 | 1.6886   | 36.9354 | 4.45111  | 4.54067  | 5.00E-05 | 0.00168949 |
| FCAR     | 18:62838409-62864521 | 39.5079  | 249.78  | 2.66044  | 5.31625  | 5.00E-05 | 0.00168949 |
| BT.97257 | 18:62895454-62900546 | 64.6083  | 369.537 | 2.51593  | 3.05688  | 5.00E-05 | 0.00168949 |
| NLRP2    | 18:62918863-62932174 | 0.283986 | 2.15306 | 2.92249  | 3.27877  | 0.0002   | 0.00512801 |
| -        | 18:63374717-63375764 | 36.1471  | 199.313 | 2.46309  | 8.98422  | 5.00E-05 | 0.00168949 |
| -        | 18:63375878-63376836 | 79.0895  | 401.113 | 2.34245  | 10.3679  | 5.00E-05 | 0.00168949 |
| LENG1    | 18:63421901-63425192 | 13.5699  | 28.6879 | 1.08003  | 2.45845  | 0.0041   | 0.0471398  |
| OSCAR    | 18:63466549-63475792 | 28.8916  | 69.9316 | 1.27529  | 1.83756  | 0.00165  | 0.0243622  |
| TARM1    | 18:63479270-63491214 | 32.2687  | 118.036 | 1.87101  | 2.49203  | 5.00E-05 | 0.00168949 |
| MAF      | 18:6537199-6553041   | 92.3871  | 37.4449 | -1.30292 | -2.26799 | 5.00E-05 | 0.00168949 |
| N4BP1    | 18:17033278-17085940 | 13.8096  | 40.3834 | 1.54809  | 2.71575  | 5.00E-05 | 0.00168949 |

|                |                      |          |         |           |          |          |            |
|----------------|----------------------|----------|---------|-----------|----------|----------|------------|
| IRX3           | 18:22692065-22694550 | 8.02602  | 17.756  | 1.14555   | 1.9415   | 0.0037   | 0.0437791  |
| MT1A           | 18:24106721-24108521 | 34.0218  | 125.854 | 1.88722   | 12.6528  | 0.0005   | 0.0101767  |
| BT.72155       | 18:24338465-24519487 | 1.50192  | 7.38029 | 2.29687   | 2.44242  | 0.0005   | 0.0101767  |
| RRAD           | 18:34746054-34749250 | 3.6132   | 11.7135 | 1.69682   | 2.92105  | 0.0007   | 0.0128987  |
| BT.38851       | 18:43574290-43644737 | 1.62285  | 5.64824 | 1.79927   | 2.70893  | 0.0002   | 0.00512801 |
| NFKBID         | 18:46768503-46776805 | 18.7379  | 61.6146 | 1.71731   | 2.6509   | 5.00E-05 | 0.00168949 |
| CD79A          | 18:51679283-51682971 | 1.07288  | 14.0956 | 3.71568   | 3.37418  | 5.00E-05 | 0.00168949 |
| KCNN4          | 18:52303108-52316896 | 43.6017  | 21.5488 | -1.01678  | -1.75218 | 0.00245  | 0.0325567  |
| GPR4           | 18:53615948-53617690 | 1.92858  | 11.4775 | 2.57319   | 3.74051  | 5.00E-05 | 0.00168949 |
| EML2           | 18:53634882-53659483 | 40.3383  | 20.6967 | -0.962748 | -1.79599 | 0.00295  | 0.0369284  |
| bta-mir-2897   | 18:54224456-54256892 | 6.43893  | 13.2667 | 1.04292   | 1.66647  | 0.00375  | 0.044144   |
| PLEKHA4        | 18:55899437-55923522 | 7.8773   | 2.69248 | -1.54876  | -2.19122 | 5.00E-05 | 0.00168949 |
| RRAS           | 18:56497093-56501119 | 11.5872  | 28.7721 | 1.31215   | 3.04896  | 0.001    | 0.0169155  |
| SIGLEC10       | 18:57835593-57843038 | 4.64401  | 2.00903 | -1.20887  | -1.60707 | 0.0041   | 0.0471398  |
| BT.88266       | 18:57861546-57868646 | 27.2204  | 121.06  | 2.15296   | 3.2969   | 5.00E-05 | 0.00168949 |
| BT.37782       | 18:61040308-61053660 | 17.7364  | 55.424  | 1.64379   | 2.57708  | 5.00E-05 | 0.00168949 |
| EPS8L1         | 18:62760765-62773059 | 1.15976  | 3.44391 | 1.57022   | 1.70335  | 0.0019   | 0.0272104  |
| ENSBTAG0000004 | 18:62872481-62888462 | 0.354959 | 2.0362  | 2.52015   | 2.54526  | 0.00015  | 0.00417103 |
| ENSBTAG0000003 | 18:63009835-63020867 | 38.4027  | 239.874 | 2.643     | 4.06296  | 5.00E-05 | 0.00168949 |
| BT.42415       | 19:5221506-5283308   | 6.96572  | 15.7156 | 1.17385   | 1.67266  | 0.00255  | 0.0334038  |
| BT.39657       | 19:5696509-5747138   | 4.85514  | 18.3362 | 1.91711   | 2.02549  | 0.0005   | 0.0101767  |
| MSI2           | 19:8321234-8723158   | 9.18452  | 37.2731 | 2.02086   | 8.21415  | 0.0001   | 0.00298488 |
| DYNLL2         | 19:9118007-9125251   | 31.3699  | 61.408  | 0.969044  | 2.22105  | 0.0034   | 0.0408591  |
| LPO            | 19:9441747-9471498   | 22.1052  | 84.7498 | 1.93883   | 2.623    | 5.00E-05 | 0.00168949 |
| VMP1           | 19:10903715-11070633 | 154.883  | 467.022 | 1.59231   | 2.44725  | 0.00115  | 0.0186976  |
| USP32          | 19:12880202-13085137 | 12.838   | 34.5712 | 1.42916   | 2.49772  | 0.0001   | 0.00298488 |
| DHRS11         | 19:13237730-13247622 | 18.9084  | 48.8983 | 1.37076   | 2.17633  | 0.0001   | 0.00298488 |
| CCL3           | 19:14673889-14704986 | 266.402  | 2242.25 | 3.07327   | 7.80432  | 5.00E-05 | 0.00168949 |
| CCL5           | 19:14823469-14831157 | 67.0941  | 421.399 | 2.65093   | 6.95089  | 5.00E-05 | 0.00168949 |
| KSR1           | 19:19457616-19618012 | 4.68607  | 12.8599 | 1.45642   | 2.14389  | 0.0001   | 0.00298488 |
| CPD            | 19:22025795-22086708 | 22.8103  | 52.0375 | 1.18986   | 2.21159  | 0.00105  | 0.0176318  |
| GOSR1          | 19:22108501-22140940 | 38.2378  | 78.7931 | 1.04307   | 1.7588   | 0.0022   | 0.0300732  |
| NXN            | 19:22457711-22621493 | 2.7568   | 7.04885 | 1.35439   | 2.27765  | 0.00085  | 0.0150217  |
| HIC1           | 19:23655530-23659389 | 0.853697 | 3.25958 | 1.93289   | 1.96124  | 0.0024   | 0.0320774  |
| SLC13A5        | 19:25791869-25815845 | 25.1944  | 67.0807 | 1.4128    | 2.27043  | 0.00015  | 0.00417103 |
| BT.2598        | 19:27331074-27339653 | 20.7484  | 78.5851 | 1.92126   | 2.52129  | 5.00E-05 | 0.00168949 |
| KDM6B          | 19:28135157-28155513 | 29.2845  | 166.639 | 2.50851   | 2.58006  | 5.00E-05 | 0.00168949 |
| TMEM88         | 19:28155991-28157769 | 7.96238  | 64.7659 | 3.02396   | 3.79589  | 5.00E-05 | 0.00168949 |
| NDEL1          | 19:28596037-28672316 | 44.9654  | 147.648 | 1.71527   | 2.59206  | 0.00015  | 0.00417103 |
| BT.20969       | 19:35385652-35420462 | 15.0784  | 34.0668 | 1.17588   | 1.66236  | 0.0036   | 0.0428158  |
| FLCN           | 19:35520010-35536118 | 32.9219  | 77.3527 | 1.23241   | 1.96939  | 0.0011   | 0.0181408  |

|                |                      |          |         |          |          |          |            |
|----------------|----------------------|----------|---------|----------|----------|----------|------------|
| KCNJ12         | 19:35955795-35991013 | 0.163498 | 2.40575 | 3.87915  | 2.88777  | 0.0018   | 0.026296   |
| CSF3           | 19:40981662-40983998 | 1.40717  | 85.4209 | 5.92372  | 6.19913  | 5.00E-05 | 0.00168949 |
| STAT5A         | 19:43033596-43054075 | 29.9721  | 62.7132 | 1.06515  | 2.01283  | 0.0015   | 0.0228053  |
| HSD17B1        | 19:43268325-43270819 | 1.58061  | 8.0717  | 2.35239  | 3.37955  | 0.00015  | 0.00417103 |
| RUNDC1         | 19:43653716-43669111 | 7.20294  | 14.4118 | 1.0006   | 1.64657  | 0.0031   | 0.0382177  |
| INTB3          | 19:46968836-47027388 | 86.4174  | 42.8243 | -1.01289 | -2.00656 | 0.0043   | 0.0488299  |
| MAFG           | 19:51576539-51582086 | 36.0408  | 81.6446 | 1.17973  | 1.94446  | 0.00105  | 0.0176318  |
| SOCS3          | 19:54458148-54459555 | 52.6686  | 520.667 | 3.30535  | 4.4466   | 5.00E-05 | 0.00168949 |
| GRB2           | 19:56754111-56842004 | 167.525  | 371.33  | 1.14833  | 1.74712  | 0.00225  | 0.0305452  |
| MIF4GD,SLC25A1 | 19:56842312-56862920 | 88.7206  | 265.3   | 1.58028  | 2.84028  | 0.0006   | 0.0116461  |
| C19H17orf28    | 19:57076158-57097117 | 3.46356  | 9.07356 | 1.38941  | 1.89016  | 0.0011   | 0.0181408  |
| FADS6          | 19:57141971-57157895 | 63.6273  | 31.3104 | -1.02301 | -2.22869 | 0.0032   | 0.0392405  |
| CD300LF        | 19:57287915-57398998 | 9.04825  | 22.3977 | 1.30764  | 1.74968  | 0.0017   | 0.0250202  |
| CD300E         | 19:57430804-57439771 | 55.9102  | 22.16   | -1.33515 | -2.1119  | 0.00035  | 0.00778905 |
| ABCA6          | 19:62014854-62094302 | 10.8618  | 24.8414 | 1.19349  | 2.0032   | 0.001    | 0.0169155  |
| BT.103824      | 19:62348240-62404525 | 11.5844  | 28.8472 | 1.31625  | 1.96872  | 0.0002   | 0.00512801 |
| -              | 19:62405286-62405609 | 0        | 117.139 | inf      | nan      | 0.0006   | 0.0116461  |
| BT.89318       | 19:62424506-62457703 | 26.5099  | 52.6598 | 0.990168 | 1.64793  | 0.00285  | 0.0362346  |
| SLC16A6        | 19:62477671-62496100 | 7.7655   | 24.0881 | 1.63317  | 2.43498  | 0.0001   | 0.00298488 |
| BT.62349       | 19:8900989-8974286   | 5.68031  | 13.8069 | 1.28135  | 2.11523  | 0.00035  | 0.00778905 |
| MPO            | 19:9473000-9484197   | 6.98125  | 2.56572 | -1.44412 | -2.06673 | 0.00075  | 0.0136024  |
| 4-Sep          | 19:9697826-9709821   | 10.739   | 29.3776 | 1.45185  | 2.14273  | 0.0002   | 0.00512801 |
| BT.88312       | 19:13752491-13996058 | 10.8715  | 32.5807 | 1.58347  | 2.10406  | 0.00065  | 0.0121886  |
| CCL4           | 19:14653466-14655028 | 195.691  | 637.395 | 1.70361  | 4.89432  | 5.00E-05 | 0.00168949 |
| CCL8           | 19:16137673-16139707 | 61.8739  | 26.5122 | -1.22267 | -2.94629 | 0.0033   | 0.0400404  |
| BT.23126       | 19:19758763-19958246 | 62.6171  | 356.261 | 2.5083   | 3.01782  | 5.00E-05 | 0.00168949 |
| FLOT2          | 19:20810486-20817364 | 63.7243  | 128.297 | 1.00957  | 1.62553  | 0.0044   | 0.0493571  |
| DHRS13         | 19:20828076-20832961 | 2.76936  | 8.20489 | 1.56693  | 2.57775  | 0.0006   | 0.0116461  |
| PHF12          | 19:20835679-20875590 | 26.0598  | 111.362 | 2.09536  | 2.67938  | 5.00E-05 | 0.00168949 |
| CORO6          | 19:21426532-21434772 | 0.4911   | 2.7863  | 2.50426  | 2.55457  | 0.00025  | 0.0060614  |
| SSH2           | 19:21439741-21574647 | 11.9684  | 49.4653 | 2.04719  | 2.91125  | 5.00E-05 | 0.00168949 |
| -              | 19:22099346-22104985 | 59.1023  | 168.11  | 1.50812  | 5.25832  | 0.0001   | 0.00298488 |
| bta-mir-22     | 19:23381003-23384680 | 39.4131  | 118.77  | 1.59143  | 1.65095  | 0.00255  | 0.0334038  |
| BT.62377       | 19:25163840-25198117 | 26.2347  | 12.9721 | -1.01606 | -1.79003 | 0.00185  | 0.0267998  |
| VAMP2          | 19:28408301-28410747 | 28.9534  | 61.93   | 1.09691  | 3.14465  | 0.00095  | 0.0163093  |
| MYH10          | 19:28680824-28800880 | 1.36658  | 3.85826 | 1.49739  | 2.29413  | 0.00025  | 0.0060614  |
| PIK3R6         | 19:28900067-28961797 | 0.843944 | 4.77604 | 2.5006   | 2.69297  | 5.00E-05 | 0.00168949 |
| PIK3R5         | 19:28975558-29048771 | 20.4782  | 60.5074 | 1.56302  | 2.21901  | 5.00E-05 | 0.00168949 |
| TRPV2          | 19:33816539-33834916 | 141.009  | 63.6928 | -1.14659 | -2.14502 | 0.00195  | 0.0276684  |
| SPATA20        | 19:36799922-36807919 | 4.27927  | 1.60215 | -1.41736 | -1.88208 | 0.0026   | 0.0338024  |
| SGCA           | 19:37113476-37122940 | 44.1798  | 13.2662 | -1.73563 | -2.92095 | 5.00E-05 | 0.00168949 |

|                |                       |          |          |           |          |          |            |
|----------------|-----------------------|----------|----------|-----------|----------|----------|------------|
| NPEPPS         | 19:39460691-39564822  | 25.9224  | 54.7233  | 1.07795   | 1.95602  | 0.00155  | 0.0233854  |
| BT.62405       | 19:40779126-40864311  | 0.261614 | 2.80588  | 3.42294   | 2.59516  | 0.0002   | 0.00512801 |
| STAT3          | 19:43056659-43132624  | 46.7739  | 138.042  | 1.56133   | 2.27748  | 0.0002   | 0.00512801 |
| PTRF           | 19:43148012-43162165  | 3.98895  | 16.5889  | 2.05614   | 3.02797  | 5.00E-05 | 0.00168949 |
| EZH1           | 19:43395929-43428273  | 11.3138  | 23.2832  | 1.04121   | 1.84736  | 0.0023   | 0.0310714  |
| ICAM2          | 19:48857449-48889758  | 29.927   | 208.868  | 2.80307   | 6.5829   | 5.00E-05 | 0.00168949 |
| SPHK1          | 19:55978950-55984461  | 89.8876  | 45.7256  | -0.975121 | -1.75133 | 0.00235  | 0.03147    |
| CD300A         | 19:57604424-57626900  | 37.8624  | 132.261  | 1.80455   | 2.23289  | 5.00E-05 | 0.00168949 |
| KCNJ2          | 19:61185602-61195897  | 3.4858   | 13.2259  | 1.9238    | 3.36226  | 5.00E-05 | 0.00168949 |
| NIPA1          | 2:916139-963773       | 30.5565  | 6.66787  | -2.19618  | -2.93924 | 5.00E-05 | 0.00168949 |
| BT.54746       | 2:5350653-5407851     | 39.4993  | 16.1594  | -1.28945  | -2.17159 | 5.00E-05 | 0.00168949 |
| MSTN           | 2:6213565-6220196     | 0.396802 | 2.35712  | 2.57054   | 3.11253  | 0.00045  | 0.00945137 |
| CALCRL         | 2:8901431-9030989     | 2.57219  | 0.856903 | -1.58579  | -2.47087 | 0.00055  | 0.0109367  |
| NCKAP1         | 2:13575101-13664827   | 2.40557  | 5.68327  | 1.24034   | 2.02584  | 0.00175  | 0.0256741  |
| CCDC141        | 2:17791921-18014475   | 1.31365  | 0.299433 | -2.13328  | -2.06684 | 0.0014   | 0.0216421  |
| BT.17324       | 2:19659539-19692048   | 85.6696  | 247.252  | 1.52913   | 2.06604  | 0.00165  | 0.0243622  |
| COBLL1         | 2:31530968-31687456   | 5.51732  | 16.9907  | 1.62271   | 2.01469  | 0.00055  | 0.0109367  |
| ENSBTAG0000004 | 2:31688428-31699171   | 6.16121  | 18.9204  | 1.61866   | 2.74028  | 0.00025  | 0.0060614  |
| IFIH1          | 2:34217172-34272473   | 24.404   | 65.8497  | 1.43206   | 2.26587  | 0.00125  | 0.0198792  |
| FAP            | 2:34297725-34376828   | 0.110047 | 2.1433   | 4.28365   | 2.83736  | 0.0006   | 0.0116461  |
| CYTIP          | 2:38629903-38726669   | 59.5053  | 198.967  | 1.74144   | 5.05059  | 5.00E-05 | 0.00168949 |
| NR4A2          | 2:39999712-40017015   | 8.59459  | 21.0387  | 1.29155   | 2.08854  | 0.0002   | 0.00512801 |
| BT.58902       | 2:44146495-44166620   | 19.2721  | 40.9884  | 1.0887    | 1.9613   | 0.0009   | 0.015665   |
| BT.87159       | 2:44930494-44950481   | 49.1652  | 147.553  | 1.58552   | 2.67926  | 5.00E-05 | 0.00168949 |
| GYPC           | 2:79255579-79304396   | 3.28339  | 11.9227  | 1.86046   | 2.09866  | 0.0004   | 0.00870551 |
| OBFC2A         | 2:80641182-80657684   | 9.67298  | 24.0841  | 1.31605   | 1.87597  | 0.0016   | 0.023879   |
| BT.30256       | 2:86410859-86427846   | 17.3128  | 45.9052  | 1.40682   | 2.54078  | 0.00025  | 0.0060614  |
| BT.45005       | 2:89517810-89589090   | 0.488098 | 4.44979  | 3.1885    | 1.89501  | 0.0004   | 0.00870551 |
| FLIP           | 2:90139394-90174381   | 33.3455  | 75.5853  | 1.18061   | 1.97245  | 0.0009   | 0.015665   |
| CREB1          | 2:96278068-96330452   | 9.83135  | 31.2214  | 1.66708   | 2.63991  | 5.00E-05 | 0.00168949 |
| CYP27A1        | 2:107462686-107504968 | 390.742  | 162.146  | -1.26893  | -2.15721 | 0.00195  | 0.0276684  |
| SLC4A3         | 2:108272275-108286884 | 2.57844  | 1.14861  | -1.16661  | -1.60551 | 0.00355  | 0.042367   |
| CCL20          | 2:116759407-116762490 | 38.8515  | 343.828  | 3.14564   | 25.3777  | 5.00E-05 | 0.00168949 |
| ENSBTAG0000003 | 2:119171758-119263577 | 48.5108  | 155.848  | 1.68377   | 1.98045  | 0.00215  | 0.029713   |
| ITM2C          | 2:119476495-119490380 | 51.4439  | 150.703  | 1.55063   | 2.55095  | 0.00015  | 0.00417103 |
| RNF19B         | 2:121552617-121576145 | 44.7118  | 115.922  | 1.37442   | 2.05773  | 0.00085  | 0.0150217  |
| FABP3          | 2:122723224-122783830 | 1847.12  | 6910.39  | 1.90349   | 3.42573  | 0.0022   | 0.0300732  |
| IFI6           | 2:126246560-126250182 | 220.823  | 98.6574  | -1.16239  | -2.10113 | 0.0002   | 0.00512801 |
| FGR            | 2:126273135-126291824 | 72.6518  | 217.15   | 1.57962   | 2.11567  | 0.00025  | 0.0060614  |
| SLC30A2        | 2:127638450-127645772 | 4.76879  | 18.0842  | 1.92304   | 2.48986  | 5.00E-05 | 0.00168949 |
| FUCA1          | 2:129652474-129675550 | 42.2806  | 22.0104  | -0.941811 | -1.71521 | 0.00395  | 0.045989   |

|                 |                       |           |          |           |          |          |            |
|-----------------|-----------------------|-----------|----------|-----------|----------|----------|------------|
| E2F2            | 2:129925613-129944755 | 6.04698   | 27.6724  | 2.19416   | 2.57777  | 5.00E-05 | 0.00168949 |
| ECE1            | 2:131935440-132060210 | 63.1217   | 274.607  | 2.12116   | 2.31851  | 0.00015  | 0.00417103 |
| BT.37581        | 2:133149364-133157295 | 1.1267    | 4.40165  | 1.96594   | 1.83315  | 0.00195  | 0.0276684  |
| UBL5            | 2:23299146-23299368   | 1157.46   | 3463.2   | 1.58115   | 159.042  | 0.00035  | 0.00778905 |
| BT.17865        | 2:27317637-27380521   | 2.55279   | 14.8777  | 2.543     | 3.20046  | 5.00E-05 | 0.00168949 |
| TANK            | 2:35247177-35343029   | 14.4749   | 56.5776  | 1.96668   | 3.33286  | 5.00E-05 | 0.00168949 |
| TANC1           | 2:37239776-37490228   | 8.09077   | 3.8651   | -1.06577  | -1.82532 | 0.00095  | 0.0163093  |
| TSG-6           | 2:44850891-44867293   | 19.1207   | 91.5586  | 2.25956   | 5.23312  | 5.00E-05 | 0.00168949 |
| HNMT            | 2:59376268-59462595   | 21.4154   | 10.8051  | -0.986942 | -1.83009 | 0.0037   | 0.0437791  |
| BT.36236        | 2:84773342-85028103   | 0.0581793 | 0.825637 | 3.82693   | 3.15199  | 5.00E-05 | 0.00168949 |
| CLK1            | 2:89920585-89927845   | 25.8362   | 61.3993  | 1.24883   | 2.08003  | 0.00125  | 0.0198792  |
| KLF7            | 2:95781393-95903616   | 9.17489   | 22.3341  | 1.28349   | 2.06877  | 0.00015  | 0.00417103 |
| C2ORF80         | 2:96867886-96890885   | 265.017   | 801.135  | 1.59596   | 2.21287  | 5.00E-05 | 0.00168949 |
| TUBA4A          | 2:107921713-107925511 | 6.20249   | 15.9184  | 1.35978   | 2.61007  | 0.0007   | 0.0128987  |
| KIAA1522        | 2:121713354-121740725 | 28.5358   | 12.2016  | -1.22571  | -1.73397 | 0.0029   | 0.0365009  |
| FAM167B         | 2:122115659-122117248 | 4.16693   | 15.0059  | 1.84847   | 3.40526  | 0.00015  | 0.00417103 |
| HCRTR1          | 2:122641986-122650109 | 127.724   | 46.1982  | -1.46712  | -2.59076 | 5.00E-05 | 0.00168949 |
| TINAGL1         | 2:122685822-122696171 | 599.896   | 209.758  | -1.51599  | -2.10761 | 0.00065  | 0.0121886  |
| SESN2           | 2:125698150-125714128 | 26.6914   | 85.8893  | 1.6861    | 2.59694  | 5.00E-05 | 0.00168949 |
| C1ORF38         | 2:126030986-126070741 | 27.0659   | 148.884  | 2.45964   | 2.2035   | 5.00E-05 | 0.00168949 |
| MAN1C1          | 2:127888645-128008111 | 29.9744   | 14.5712  | -1.04062  | -1.76638 | 0.0016   | 0.023879   |
| C1QC            | 2:130783986-130788357 | 72.7381   | 35.8999  | -1.01873  | -2.50173 | 0.00125  | 0.0198792  |
| C1QA            | 2:130792854-130795743 | 91.2384   | 46.2557  | -0.98001  | -1.59357 | 0.0021   | 0.0292856  |
| CDA             | 2:132636461-132657392 | 8.11341   | 173.069  | 4.4149    | 8.23804  | 5.00E-05 | 0.00168949 |
| BT.84824        | 2:133224530-133246491 | 1.66903   | 17.7136  | 3.40777   | 3.07353  | 5.00E-05 | 0.00168949 |
| NBL1            | 2:133632741-133644722 | 27.3125   | 9.55105  | -1.51583  | -2.05697 | 0.0002   | 0.00512801 |
| BT.102307,C5ORF | 20:4684718-4767975    | 16.0306   | 52.9277  | 1.72319   | 2.02242  | 0.0013   | 0.0203927  |
| BT.22214        | 20:12352170-12366624  | 14.2167   | 5.62801  | -1.33689  | -1.99213 | 0.00045  | 0.00945137 |
| BT.78334        | 20:33688290-33721667  | 10.1466   | 27.8435  | 1.45635   | 2.39412  | 0.0003   | 0.00696807 |
| TTC33           | 20:33721921-33747493  | 4.0923    | 11.0698  | 1.43565   | 1.95101  | 0.00085  | 0.0150217  |
| FYB             | 20:35176988-35347535  | 39.9647   | 156.717  | 1.97136   | 2.56416  | 5.00E-05 | 0.00168949 |
| RICTOR          | 20:35376523-35514741  | 2.94918   | 12.2292  | 2.05194   | 3.26677  | 5.00E-05 | 0.00168949 |
| PRLR            | 20:38951596-39137480  | 2.05629   | 5.24064  | 1.3497    | 1.6757   | 0.00275  | 0.0352551  |
| FAM134B         | 20:56644738-56758641  | 18.6791   | 48.0854  | 1.36417   | 2.06311  | 0.0003   | 0.00696807 |
| BT.85182        | 20:4449108-4452189    | 270.029   | 805.805  | 1.57732   | 2.03439  | 0.00385  | 0.0451289  |
| NAIP            | 20:10071639-10111995  | 39.1062   | 182.074  | 2.21906   | 2.89529  | 5.00E-05 | 0.00168949 |
| GPBP1           | 20:22033856-22098163  | 29.2868   | 95.2023  | 1.70074   | 2.71597  | 5.00E-05 | 0.00168949 |
| -               | 20:22098359-22099742  | 1548.47   | 5931.97  | 1.93767   | 306.047  | 0.00015  | 0.00417103 |
| SNX18           | 20:24564479-24596518  | 42.8861   | 111.729  | 1.38142   | 2.09451  | 0.0008   | 0.0143027  |
| BT.83070        | 20:26116746-26227530  | 0.123854  | 0.603381 | 2.28443   | 1.91197  | 0.00335  | 0.0404341  |
| RAI14           | 20:39352840-39515205  | 4.56029   | 9.34475  | 1.03503   | 1.70162  | 0.00205  | 0.0286751  |

|                |                      |          |         |          |          |          |            |
|----------------|----------------------|----------|---------|----------|----------|----------|------------|
| TARS           | 20:40349624-40373143 | 122.501  | 345.948 | 1.49776  | 2.12344  | 0.0006   | 0.0116461  |
| -              | 20:40431781-40435815 | 213.015  | 1439.23 | 2.75628  | 174.778  | 0.00275  | 0.0352551  |
| -              | 20:55809586-55828320 | 32.9865  | 705.575 | 4.41885  | 1.1121   | 0.0005   | 0.0101767  |
| ENSBTAG0000003 | 20:55967803-56022210 | 18.9132  | 79.4717 | 2.07105  | 2.77167  | 5.00E-05 | 0.00168949 |
| ANKRD33B       | 20:62725183-62820226 | 2.55644  | 13.309  | 2.38019  | 2.6032   | 5.00E-05 | 0.00168949 |
| -              | 20:67244934-67250973 | 0        | 1717.26 | inf      | nan      | 5.00E-05 | 0.00168949 |
| ENSBTAG0000002 | 21:15998169-16090486 | 52.9718  | 135.912 | 1.35938  | 2.24114  | 0.0002   | 0.00512801 |
| AKAP13         | 21:16597559-16910889 | 35.8422  | 92.6302 | 1.36983  | 1.72527  | 0.003    | 0.0373514  |
| -              | 21:16911027-16912312 | 2421.78  | 9734.4  | 2.00703  | 338.055  | 5.00E-05 | 0.00168949 |
| ISG20          | 21:20013718-20031094 | 156.946  | 704.374 | 2.16607  | 2.94471  | 5.00E-05 | 0.00168949 |
| ALPK3,BT.25251 | 21:22822424-22935573 | 8.50595  | 16.8396 | 0.985316 | 1.63671  | 0.00265  | 0.0342912  |
| BT.42063       | 21:22949799-23048041 | 0.904286 | 3.77136 | 2.06024  | 2.01875  | 0.0003   | 0.00696807 |
| WHAMM          | 21:23546101-23564527 | 8.41899  | 23.771  | 1.49748  | 2.42646  | 5.00E-05 | 0.00168949 |
| SEMA7A         | 21:34625076-34651240 | 92.359   | 241.054 | 1.38403  | 1.8823   | 0.0005   | 0.0101767  |
| -              | 21:45607102-45618802 | 141.698  | 334.992 | 1.24131  | 14.6653  | 0.00145  | 0.0222656  |
| TRAF3          | 21:69204550-69254153 | 9.64528  | 28.3698 | 1.55646  | 2.58879  | 5.00E-05 | 0.00168949 |
| BT.101554      | 21:71507508-71509649 | 0        | 2.05153 | inf      | nan      | 5.00E-05 | 0.00168949 |
| -              | 21:8842360-8855164   | 0        | 6.77656 | inf      | nan      | 0.00035  | 0.00778905 |
| ARRDC4         | 21:8924762-8939028   | 58.8675  | 223.382 | 1.92397  | 2.57712  | 0.0001   | 0.00298488 |
| BT.28177       | 21:12839570-13098203 | 4.90536  | 18.6853 | 1.92947  | 2.97502  | 5.00E-05 | 0.00168949 |
| MFGE8          | 21:20889912-20920858 | 146.079  | 562.677 | 1.94556  | 2.25298  | 0.0003   | 0.00696807 |
| FES            | 21:22192639-22204117 | 67.1714  | 32.8479 | -1.03204 | -1.66954 | 0.0022   | 0.0300732  |
| NMB            | 21:22740675-22744781 | 3.53129  | 36.9031 | 3.38548  | 3.09415  | 5.00E-05 | 0.00168949 |
| FSD2           | 21:23501905-23545813 | 0.675516 | 3.26161 | 2.27152  | 2.61206  | 5.00E-05 | 0.00168949 |
| HOMER2         | 21:23577845-23668524 | 4.26841  | 12.253  | 1.52137  | 2.13583  | 0.0002   | 0.00512801 |
| MTHFS          | 21:26449625-26466916 | 19.2039  | 41.6916 | 1.11836  | 2.36584  | 0.00165  | 0.0243622  |
| BCL2A1         | 21:26473688-26501188 | 108.181  | 519.176 | 2.26278  | 4.03461  | 5.00E-05 | 0.00168949 |
| BT.29712       | 21:28934157-29047006 | 1.78273  | 4.58573 | 1.36306  | 1.92346  | 0.0005   | 0.0101767  |
| CLK3           | 21:34438145-34452179 | 27.0093  | 54.9207 | 1.0239   | 1.70459  | 0.002    | 0.0280894  |
| EGLN3          | 21:44805297-44834310 | 19.9327  | 47.7345 | 1.25989  | 2.44648  | 0.00075  | 0.0136024  |
| SPTSSA         | 21:45295074-45341768 | 35.7369  | 88.0364 | 1.30069  | 2.64798  | 0.0001   | 0.00298488 |
| BAZ1A          | 21:45536723-45586839 | 27.8725  | 74.9414 | 1.42692  | 2.17541  | 0.0003   | 0.00696807 |
| GPR68          | 21:56588075-56625811 | 3.77724  | 11.2363 | 1.57277  | 2.29079  | 5.00E-05 | 0.00168949 |
| CLMN           | 21:61602704-61653533 | 6.99807  | 21.1029 | 1.59241  | 2.12429  | 5.00E-05 | 0.00168949 |
| -              | 21:68592146-68594450 | 54.5489  | 390.14  | 2.83837  | 66.2846  | 0.0042   | 0.0479306  |
| -              | 21:71450537-71450964 | 0        | 1305.76 | inf      | nan      | 5.00E-05 | 0.00168949 |
| VOPPI          | 22:495505-677104     | 10.8222  | 3.43426 | -1.65592 | -2.83063 | 0.00015  | 0.00417103 |
| CMTM8          | 22:6789384-6891230   | 12.6345  | 35.1977 | 1.47811  | 1.99032  | 0.0012   | 0.0192837  |
| TRANK1         | 22:10626377-10722545 | 19.9386  | 66.2319 | 1.73196  | 1.84577  | 0.00255  | 0.0334038  |
| BT.48995       | 22:11646790-11652092 | 140.038  | 451.43  | 1.68868  | 2.06616  | 0.0005   | 0.0101767  |
| OXSR1          | 22:11674126-11758890 | 37.5602  | 121.203 | 1.69015  | 2.75835  | 5.00E-05 | 0.00168949 |

|                 |                      |          |         |           |          |          |            |
|-----------------|----------------------|----------|---------|-----------|----------|----------|------------|
| SLC22A13,SLC22/ | 22:11766154-11801567 | 1.20556  | 15.0628 | 3.64322   | 4.1032   | 5.00E-05 | 0.00168949 |
| BT.46336        | 22:15280707-15312566 | 1.40511  | 4.77741 | 1.76555   | 2.03936  | 0.0009   | 0.015665   |
| PRRT3,TMEM111   | 22:16833932-16863951 | 157.743  | 410.619 | 1.38023   | 4.81773  | 5.00E-05 | 0.00168949 |
| RYBP            | 22:29300025-29392548 | 54.648   | 155.965 | 1.51298   | 2.58556  | 5.00E-05 | 0.00168949 |
| TMF1            | 22:32610464-32640830 | 12.7621  | 34.0471 | 1.41567   | 2.34387  | 5.00E-05 | 0.00168949 |
| ATP5E           | 22:35335189-35335581 | 52.3379  | 198.22  | 1.92117   | 14.147   | 0.0001   | 0.00298488 |
| MAGI1           | 22:35874897-36134917 | 2.83555  | 11.3109 | 1.99601   | 2.38658  | 5.00E-05 | 0.00168949 |
| MGC143103       | 22:43324031-43357321 | 8.73739  | 29.6518 | 1.76285   | 2.11396  | 0.00065  | 0.0121886  |
| SELK            | 22:47582814-47590574 | 46.6716  | 97.6341 | 1.06484   | 2.99465  | 0.0013   | 0.0203927  |
| CISH            | 22:50320204-50325617 | 6.23608  | 29.552  | 2.24454   | 3.39833  | 5.00E-05 | 0.00168949 |
| BT.56096        | 22:50577798-50586504 | 23.6589  | 51.2837 | 1.11611   | 1.887    | 0.00155  | 0.0233854  |
| LTF             | 22:53521699-53556089 | 38.5217  | 96.9638 | 1.33178   | 1.94796  | 0.00165  | 0.0243622  |
| BT.106550       | 22:53900594-53945136 | 3.84546  | 24.925  | 2.69636   | 3.34723  | 5.00E-05 | 0.00168949 |
| NUP210          | 22:59167625-59244943 | 1.43523  | 4.07961 | 1.50715   | 2.11404  | 0.00015  | 0.00417103 |
| IQSEC1          | 22:59455350-59549010 | 14.0545  | 32.9491 | 1.22921   | 1.78635  | 0.00115  | 0.0186976  |
| GLB1            | 22:7413787-7517634   | 73.9925  | 35.7381 | -1.04992  | -2.09497 | 0.00195  | 0.0276684  |
| BT.102977       | 22:12520392-12532806 | 28.7189  | 195.16  | 2.76458   | 4.6248   | 5.00E-05 | 0.00168949 |
| TATDN2          | 22:16672484-16691395 | 8.21526  | 19.7671 | 1.26672   | 2.09339  | 0.0002   | 0.00512801 |
| IRAK2           | 22:16694677-16750676 | 16.3619  | 56.6356 | 1.79137   | 2.90062  | 5.00E-05 | 0.00168949 |
| BHLHE40         | 22:21491413-21498539 | 75.7539  | 526.218 | 2.79627   | 3.21012  | 5.00E-05 | 0.00168949 |
| BT.22305        | 22:21615592-21969823 | 3.32292  | 8.06241 | 1.27876   | 1.78452  | 0.0044   | 0.0493571  |
| -               | 22:37556747-37583311 | 2.95221  | 9.66965 | 1.71167   | 1.57307  | 0.0034   | 0.0408591  |
| ATXN7           | 22:37585223-37676023 | 7.29649  | 16.8506 | 1.20753   | 1.92032  | 0.00065  | 0.0121886  |
| PXK,RPP14       | 22:43467863-43561145 | 31.7731  | 81.1086 | 1.35205   | 2.63189  | 0.0001   | 0.00298488 |
| SEMA3B          | 22:50655647-50662413 | 0.356174 | 1.46116 | 2.03646   | 1.87239  | 0.00305  | 0.0378715  |
| SLC38A3         | 22:50702768-50717581 | 2.95491  | 10.2233 | 1.79067   | 2.17874  | 0.0003   | 0.00696807 |
| SEMA3F          | 22:50733156-50769905 | 1.73456  | 4.15864 | 1.26155   | 1.68298  | 0.0044   | 0.0493571  |
| BT.88492        | 22:51187153-51219800 | 19.1723  | 10.0079 | -0.937877 | -1.55562 | 0.0036   | 0.0428158  |
| CCRL2           | 22:53567796-53584659 | 87.707   | 514.813 | 2.55329   | 3.05966  | 5.00E-05 | 0.00168949 |
| -               | 22:53872979-53888393 | 0        | 250.275 | inf       | nan      | 0.0008   | 0.0143027  |
| BT.35872        | 22:59089633-59103701 | 8.69716  | 28.32   | 1.7032    | 1.66614  | 0.0019   | 0.0272104  |
| ABTB1           | 22:60502718-60507378 | 90.7028  | 204.796 | 1.17497   | 1.85086  | 0.00295  | 0.0369284  |
| BT.20328        | 23:7528758-7534103   | 29.7187  | 101.564 | 1.77295   | 2.72152  | 5.00E-05 | 0.00168949 |
| PPARD           | 23:9269505-9355959   | 57.3349  | 140.326 | 1.2913    | 1.99357  | 0.00125  | 0.0198792  |
| ARMC12          | 23:9683249-9694015   | 0.345135 | 2.19249 | 2.66734   | 1.99405  | 0.00245  | 0.0325567  |
| MAPK13          | 23:10036665-10045045 | 19.4818  | 42.198  | 1.11505   | 1.73307  | 0.0027   | 0.0347754  |
| CDKN1A          | 23:10560498-10568780 | 82.9026  | 273.608 | 1.72262   | 2.68832  | 5.00E-05 | 0.00168949 |
| ZFAND3          | 23:11712801-12040961 | 25.1038  | 48.8965 | 0.961824  | 1.58601  | 0.0042   | 0.0479306  |
| DAAM2           | 23:13775148-13829110 | 1.02609  | 4.23346 | 2.04468   | 2.89873  | 5.00E-05 | 0.00168949 |
| VEGFA           | 23:17255946-17269998 | 91.8886  | 707.084 | 2.94392   | 3.03603  | 5.00E-05 | 0.00168949 |
| BT.68975        | 23:25030302-25051787 | 25.0357  | 56.3117 | 1.16945   | 1.97492  | 0.00075  | 0.0136024  |



|                |                      |          |         |           |          |          |            |
|----------------|----------------------|----------|---------|-----------|----------|----------|------------|
| NOTCH4         | 23:26973190-27001754 | 121.874  | 266.834 | 1.13055   | 1.71227  | 0.00215  | 0.029713   |
| AGER           | 23:27008830-27011946 | 5.23582  | 13.4005 | 1.3558    | 1.78135  | 0.00115  | 0.0186976  |
| LTB            | 23:27529855-27531864 | 31.1021  | 121.785 | 1.96925   | 2.93205  | 5.00E-05 | 0.00168949 |
| MGC126945      | 23:27600054-27604052 | 7.18723  | 33.4533 | 2.21864   | 3.16528  | 5.00E-05 | 0.00168949 |
| IER3           | 23:28088455-28089722 | 134.047  | 494.857 | 1.88428   | 3.53864  | 5.00E-05 | 0.00168949 |
| BT.49039       | 23:28918427-28920742 | 22.4537  | 69.406  | 1.62811   | 3.04301  | 0.00055  | 0.0109367  |
| H2B            | 23:31589470-31607791 | 22.0064  | 66.6308 | 1.59827   | 4.16821  | 5.00E-05 | 0.00168949 |
| H4             | 23:31665561-31667068 | 3.60817  | 10.337  | 1.51848   | 2.73037  | 0.0011   | 0.0181408  |
| FAM65B         | 23:32553222-32763526 | 16.5792  | 88.2493 | 2.41221   | 2.77064  | 5.00E-05 | 0.00168949 |
| MBOAT1         | 23:37498571-37614367 | 10.3093  | 26.939  | 1.38575   | 2.51935  | 5.00E-05 | 0.00168949 |
| C23H6ORF105    | 23:44468218-44536868 | 31.2483  | 13.6856 | -1.19112  | -1.96723 | 0.0011   | 0.0181408  |
| TUBB2B         | 23:50354842-50366294 | 44.8068  | 19.114  | -1.22909  | -2.04494 | 0.0005   | 0.0101767  |
| BT.105119      | 23:50390116-50394279 | 106.356  | 53.4964 | -0.991382 | -1.67609 | 0.00325  | 0.0397126  |
| LRRC1          | 23:6528071-6666274   | 4.80931  | 12.118  | 1.33325   | 1.80755  | 0.0023   | 0.0310714  |
| BOLA-DOB       | 23:7054418-7063641   | 2.0521   | 7.25815 | 1.8225    | 2.9571   | 0.0035   | 0.0418788  |
| C6ORF106       | 23:8586131-8688924   | 2228.72  | 8652.87 | 1.95697   | 83.1638  | 5.00E-05 | 0.00168949 |
| PIM1           | 23:11051543-11055416 | 135.188  | 443.198 | 1.71299   | 2.42221  | 5.00E-05 | 0.00168949 |
| ENSBTAG0000004 | 23:11093688-11132861 | 0.451254 | 5.05859 | 3.48672   | 4.04541  | 0.0013   | 0.0203927  |
| MOCS1          | 23:13829694-13866950 | 56.2156  | 126.297 | 1.16777   | 1.69854  | 0.00235  | 0.03147    |
| TREML1         | 23:15081866-15086287 | 26.3903  | 12.0755 | -1.12792  | -1.77849 | 0.00235  | 0.03147    |
| TREM2          | 23:15090106-15094760 | 378.726  | 175.742 | -1.10769  | -1.69491 | 0.0016   | 0.023879   |
| TREM1          | 23:15148076-15163188 | 141.057  | 327.119 | 1.21354   | 2.23638  | 0.00435  | 0.0491152  |
| NFKBIE,SLC35B2 | 23:17874862-17887291 | 42.1645  | 90.4392 | 1.10092   | 1.74098  | 0.00425  | 0.0484612  |
| GPR110         | 23:20206357-20252189 | 0.49074  | 2.08205 | 2.08497   | 2.21481  | 0.00025  | 0.0060614  |
| -              | 23:22055460-22061477 | 0        | 2.03322 | inf       | nan      | 0.0001   | 0.00298488 |
| BT.49282       | 23:22162641-22189911 | 3.19899  | 9.15832 | 1.51747   | 2.20768  | 0.0006   | 0.0116461  |
| BT.105154      | 23:27175688-27196793 | 0.557602 | 1.4949  | 1.42275   | 1.81612  | 0.0031   | 0.0382177  |
| SNORD52        | 23:27325037-27326174 | 375.885  | 1012.7  | 1.42984   | 1.38956  | 0.0022   | 0.0300732  |
| -              | 23:27524517-27527023 | 435.114  | 1337.84 | 1.62044   | 2.27642  | 5.00E-05 | 0.00168949 |
| HIST1H2AA      | 23:31577045-31589230 | 25.3955  | 74.4166 | 1.55106   | 2.50342  | 5.00E-05 | 0.00168949 |
| BT.66635       | 23:38952209-39043167 | 3.41219  | 9.00418 | 1.3999    | 2.47519  | 0.0001   | 0.00298488 |
| MYLIP          | 23:40770025-40790973 | 5.39096  | 21.6646 | 2.00673   | 3.12284  | 5.00E-05 | 0.00168949 |
| DSP            | 23:47670502-47714288 | 2.70869  | 9.76164 | 1.84953   | 2.54724  | 5.00E-05 | 0.00168949 |
| -              | 24:2485656-2558122   | 383.474  | 854.401 | 1.15578   | 1.7345   | 0.0017   | 0.0250202  |
| MBP            | 24:2558225-2590450   | 12.9491  | 29.2685 | 1.1765    | 1.8162   | 0.0011   | 0.0181408  |
| CYB5A          | 24:4413367-4445873   | 22.3443  | 45.0193 | 1.01064   | 2.49212  | 0.0036   | 0.0428158  |
| B4GALT6        | 24:25770342-25836730 | 37.2011  | 17.8238 | -1.06154  | -1.96397 | 0.00295  | 0.0369284  |
| TGIF1          | 24:37940261-37948732 | 24.479   | 51.607  | 1.07602   | 1.77042  | 0.0019   | 0.0272104  |
| CCDC165        | 24:41543248-41689810 | 4.89953  | 2.19972 | -1.15533  | -1.84059 | 0.0008   | 0.0143027  |
| BT.64758       | 24:42230549-42305185 | 76.4619  | 160.01  | 1.06535   | 1.72396  | 0.0033   | 0.0400404  |
| BT.101003      | 24:43111843-43163936 | 4.6312   | 11.3052 | 1.28753   | 1.9768   | 0.00055  | 0.0109367  |

|            |                      |          |          |           |          |          |            |
|------------|----------------------|----------|----------|-----------|----------|----------|------------|
| MAPK4      | 24:50684777-50745042 | 0.428852 | 2.34062  | 2.44834   | 2.35621  | 0.00095  | 0.0163093  |
| SERPIN8    | 24:12694118-12736163 | 2.44484  | 13.8834  | 2.50555   | 2.98544  | 5.00E-05 | 0.00168949 |
| BT.58893   | 24:12741839-12765329 | 41.6475  | 276.374  | 2.73032   | 3.67831  | 5.00E-05 | 0.00168949 |
| TTR        | 24:25854674-25863535 | 292.728  | 125.629  | -1.22039  | -4.09682 | 0.00115  | 0.0186976  |
| TTC39C     | 24:32921537-33024956 | 3.11533  | 8.44833  | 1.43928   | 2.18614  | 0.00085  | 0.0150217  |
| RIOK3      | 24:33523339-33545584 | 21.9341  | 47.8711  | 1.12598   | 2.14798  | 0.00155  | 0.0233854  |
| COLEC12    | 24:35630928-35816269 | 0.437313 | 2.46351  | 2.49398   | 2.98448  | 5.00E-05 | 0.00168949 |
| CIDEA      | 24:43231406-43233297 | 49.1139  | 140.444  | 1.51579   | 2.13964  | 5.00E-05 | 0.00168949 |
| EPG5       | 24:46046954-46174502 | 12.8867  | 54.1563  | 2.07125   | 2.52308  | 0.00085  | 0.0150217  |
| PSTPIP2    | 24:46196112-46290465 | 40.2482  | 236.697  | 2.55605   | 3.71552  | 5.00E-05 | 0.00168949 |
| DECR2      | 25:387896-395807     | 27.5008  | 13.768   | -0.998154 | -1.74125 | 0.0013   | 0.0203927  |
| -          | 25:2492719-2520168   | 27.6851  | 1404.86  | 5.66517   | 37.2722  | 5.00E-05 | 0.00168949 |
| -          | 25:2711184-2731711   | 0        | 83.4413  | inf       | nan      | 0.0016   | 0.023879   |
| ZNF263     | 25:2733262-2740470   | 4.32897  | 24.0471  | 2.47377   | 3.56663  | 5.00E-05 | 0.00168949 |
| SNN        | 25:10417664-10425321 | 41.3008  | 162.295  | 1.97438   | 5.02886  | 5.00E-05 | 0.00168949 |
| TMC5       | 25:17123540-17201663 | 0.749722 | 2.67412  | 1.83464   | 2.0588   | 0.0011   | 0.0181408  |
| OTOA       | 25:20377459-20446664 | 0.236953 | 0.914436 | 1.94828   | 1.83112  | 0.00275  | 0.0352551  |
| IL4R       | 25:25139349-25189373 | 34.0334  | 84.1056  | 1.30525   | 1.89343  | 0.00055  | 0.0109367  |
| BT.85344   | 25:26451071-26454431 | 61.097   | 121.612  | 0.993108  | 1.63114  | 0.0029   | 0.0365009  |
| FBRS       | 25:27046296-27051971 | 22.5796  | 47.7063  | 1.07916   | 1.69769  | 0.0022   | 0.0300732  |
| STX4       | 25:27412844-27418925 | 67.8188  | 153.506  | 1.17854   | 1.94572  | 0.0009   | 0.015665   |
| BT.77188   | 25:27475330-27485029 | 47.2029  | 183.757  | 1.96085   | 2.83831  | 5.00E-05 | 0.00168949 |
| BT.35761   | 25:28461991-28481944 | 6.029    | 20.0752  | 1.73542   | 1.93655  | 0.00035  | 0.00778905 |
| RABGEF1    | 25:28482573-28534880 | 36.7718  | 201.964  | 2.45742   | 3.15576  | 5.00E-05 | 0.00168949 |
| CLDN3      | 25:34018455-34019669 | 20.1543  | 44.7833  | 1.15188   | 2.57074  | 0.0016   | 0.023879   |
| BT.56703   | 25:34634470-34642547 | 31.0461  | 65.0301  | 1.0667    | 1.70107  | 0.00245  | 0.0325567  |
| PILRA      | 25:36844018-36855872 | 7.71025  | 1.88077  | -2.03545  | -2.22086 | 0.00045  | 0.00945137 |
| -          | 25:37059881-37064822 | 0        | 146.135  | inf       | nan      | 0.0003   | 0.00696807 |
| BT.105147  | 25:38200226-38280018 | 2.44127  | 7.04337  | 1.52863   | 1.94216  | 0.0011   | 0.0181408  |
| C25H7ORF50 | 25:42234802-42303133 | 20.4439  | 104.138  | 2.34876   | 1.96723  | 0.0004   | 0.00870551 |
| -          | 25:42303860-42305224 | 187.94   | 1851.13  | 3.30006   | 315.004  | 0.0002   | 0.00512801 |
| COX19      | 25:42306359-42321964 | 10.9405  | 26.4573  | 1.27399   | 2.20141  | 0.00035  | 0.00778905 |
| CCSMST1    | 25:1116676-1117657   | 28.1674  | 84.0227  | 1.57675   | 2.47244  | 5.00E-05 | 0.00168949 |
| BT.45760   | 25:2214196-2217438   | 8.0259   | 33.6676  | 2.06863   | 2.51195  | 5.00E-05 | 0.00168949 |
| BT.106170  | 25:2230776-2232712   | 3.54506  | 28.9622  | 3.03029   | 6.22317  | 5.00E-05 | 0.00168949 |
| MEFV       | 25:2691853-2704324   | 77.757   | 471.349  | 2.59975   | 2.89321  | 5.00E-05 | 0.00168949 |
| CREBBP     | 25:3050213-3169185   | 19.8919  | 47.1856  | 1.24616   | 1.85066  | 0.0008   | 0.0143027  |
| -          | 25:10092567-10142825 | 5.58722  | 34.4501  | 2.62431   | 3.44812  | 5.00E-05 | 0.00168949 |
| -          | 25:10144534-10145862 | 100.303  | 1629.27  | 4.0218    | 278.9    | 0.00095  | 0.0163093  |
| -          | 25:10145933-10150975 | 1.7056   | 14.6596  | 3.1035    | 2.45538  | 0.00025  | 0.0060614  |
| BT.99178   | 25:10151095-10222019 | 1.35746  | 10.4857  | 2.94944   | 2.69789  | 5.00E-05 | 0.00168949 |

|                 |                      |          |         |          |          |          |            |
|-----------------|----------------------|----------|---------|----------|----------|----------|------------|
| -               | 25:10224617-10242623 | 0.530158 | 4.37137 | 3.04359  | 2.35543  | 0.00035  | 0.00778905 |
| CPPED1          | 25:11462166-11602915 | 101.229  | 39.0786 | -1.37317 | -2.22956 | 5.00E-05 | 0.00168949 |
| GPRC5B          | 25:17588927-17608885 | 5.99052  | 19.1589 | 1.67726  | 3.26565  | 0.0001   | 0.00298488 |
| BT.67549        | 25:18102958-18122387 | 34.8781  | 84.2006 | 1.27151  | 1.71005  | 0.0026   | 0.0338024  |
| CDR2            | 25:20218557-20288197 | 5.87379  | 11.9598 | 1.02583  | 1.96735  | 0.003    | 0.0373514  |
| IGSF6           | 25:20308648-20357065 | 142.782  | 591.797 | 2.05129  | 2.70076  | 5.00E-05 | 0.00168949 |
| XPO6            | 25:25881960-25987735 | 83.7227  | 294.321 | 1.8137   | 2.26107  | 0.0005   | 0.0101767  |
| CD19            | 25:26158903-26169956 | 2.61686  | 8.46962 | 1.69446  | 2.02821  | 0.00045  | 0.00945137 |
| STX1B           | 25:27381159-27412828 | 1.94758  | 28.6206 | 3.8773   | 3.92466  | 5.00E-05 | 0.00168949 |
| BT.46193,PRSS36 | 25:27485085-27501201 | 6.74756  | 17.1881 | 1.34898  | 2.51117  | 0.0002   | 0.00512801 |
| GUSB            | 25:28162568-28174955 | 144.022  | 65.5451 | -1.13573 | -2.10155 | 0.00165  | 0.0243622  |
| ASL             | 25:28247948-28294982 | 48.252   | 20.3999 | -1.24203 | -2.32906 | 0.00075  | 0.0136024  |
| -               | 25:28579921-28580641 | 0        | 752.567 | inf      | nan      | 0.0006   | 0.0116461  |
| NCF1            | 25:33267457-33282335 | 268.15   | 784.974 | 1.5496   | 2.51536  | 0.00035  | 0.00778905 |
| SH2B2           | 25:35183877-35217130 | 4.40785  | 13.3143 | 1.59483  | 2.24763  | 5.00E-05 | 0.00168949 |
| SERPINE1        | 25:36198559-36206859 | 19.0645  | 92.0294 | 2.27121  | 3.82672  | 5.00E-05 | 0.00168949 |
| BT.27151        | 25:36650860-36691626 | 60.5714  | 29.919  | -1.01758 | -1.6415  | 0.0026   | 0.0338024  |
| AZGP1           | 25:36981868-36986566 | 34.3965  | 96.5326 | 1.48876  | 2.24967  | 5.00E-05 | 0.00168949 |
| BT.88669,CYP3A5 | 25:37103039-37242576 | 28.4015  | 172.168 | 2.59977  | 3.94521  | 5.00E-05 | 0.00168949 |
| LMTK2           | 25:38347324-38420461 | 8.9637   | 20.0046 | 1.15816  | 1.83087  | 0.0009   | 0.015665   |
| DAGLB           | 25:38842843-38866581 | 68.1367  | 198.956 | 1.54594  | 1.85066  | 0.00095  | 0.0163093  |
| GPR146          | 25:42234802-42303133 | 19.3853  | 77.0689 | 1.99119  | 2.3293   | 0.0039   | 0.045599   |
| LIPM            | 26:10504439-10540469 | 2.84085  | 9.26148 | 1.70492  | 2.85616  | 0.00145  | 0.0222656  |
| FAS             | 26:10662361-10748014 | 23.8251  | 142.382 | 2.57921  | 2.67583  | 5.00E-05 | 0.00168949 |
| PCGF5           | 26:12876929-12931310 | 10.7843  | 20.9695 | 0.959358 | 1.86626  | 0.00435  | 0.0491152  |
| C10ORF28        | 26:19126366-19197680 | 6.77045  | 14.9565 | 1.14345  | 1.94071  | 0.00105  | 0.0176318  |
| SCD             | 26:21132134-21133969 | 85.0961  | 235.597 | 1.46915  | 2.21318  | 0.001    | 0.0169155  |
| SFXN3           | 26:21731731-21738756 | 21.2085  | 8.64907 | -1.29403 | -2.18438 | 0.0001   | 0.00298488 |
| BT.25271        | 26:22001749-22172725 | 9.83226  | 32.0212 | 1.70343  | 2.47845  | 5.00E-05 | 0.00168949 |
| BT.20288        | 26:22890245-22898307 | 66.3023  | 352.745 | 2.41149  | 3.0443   | 5.00E-05 | 0.00168949 |
| DUSP5           | 26:31326728-31338433 | 10.4244  | 24.8024 | 1.25051  | 1.87999  | 0.0015   | 0.0228053  |
| TECTB           | 26:33093935-33113586 | 1.71556  | 5.66792 | 1.72414  | 2.23149  | 0.0007   | 0.0128987  |
| BT.69011        | 26:39633698-39651266 | 17.866   | 50.5933 | 1.50173  | 2.57903  | 0.0001   | 0.00298488 |
| -               | 26:47843183-47843353 | 18587.5  | 0       | -inf     | nan      | 5.00E-05 | 0.00168949 |
| ANKRD22         | 26:10542378-10570091 | 39.2857  | 121.994 | 1.63473  | 3.22266  | 0.0001   | 0.00298488 |
| SLC16A12        | 26:11141010-11169619 | 3.83669  | 15.4009 | 2.00508  | 2.524    | 0.0001   | 0.00298488 |
| PIK3API,TM9SF3  | 26:17712945-17891473 | 78.6712  | 255.848 | 1.70138  | 2.15046  | 0.00025  | 0.0060614  |
| -               | 26:17891701-17901997 | 990.123  | 3601.68 | 1.86299  | 262.511  | 0.0008   | 0.0143027  |
| BT.65021        | 26:21141591-21149319 | 79.7945  | 249.551 | 1.64497  | 2.34742  | 0.00025  | 0.0060614  |
| GPAM            | 26:32963413-33005262 | 19.0842  | 74.1183 | 1.95745  | 1.82635  | 0.002    | 0.0280894  |
| C10ORF118       | 26:34884593-34927054 | 5.80584  | 14.7856 | 1.34862  | 2.18775  | 5.00E-05 | 0.00168949 |

|          |                      |           |          |          |          |          |            |
|----------|----------------------|-----------|----------|----------|----------|----------|------------|
| ABLIM1   | 26:35198880-35385824 | 1.20487   | 3.90465  | 1.69632  | 1.75843  | 0.00175  | 0.0256741  |
| LAP      | 27:5124122-5125987   | 41.6822   | 131.42   | 1.65669  | 11.0393  | 0.0026   | 0.0338024  |
| BT.25659 | 27:5788619-5790534   | 9.17016   | 41.7429  | 2.18651  | 1.90365  | 0.00235  | 0.03147    |
| ANKRD37  | 27:14706020-14708632 | 28.2777   | 72.6671  | 1.36164  | 2.17352  | 0.00045  | 0.00945137 |
| MSR1     | 27:19976213-20056927 | 166.38    | 69.6058  | -1.2572  | -2.33596 | 0.00035  | 0.00778905 |
| -        | 27:24255146-24256902 | 503.707   | 9675.05  | 4.26361  | 3.22587  | 5.00E-05 | 0.00168949 |
| -        | 27:24279515-24280598 | 0         | 521.407  | inf      | nan      | 5.00E-05 | 0.00168949 |
| IDO2     | 27:34707900-34774452 | 0.0564024 | 0.999064 | 4.14675  | 1.40781  | 0.0013   | 0.0203927  |
| GOLGA7   | 27:36108111-36125175 | 40.3493   | 81.067   | 1.00657  | 1.76863  | 0.00335  | 0.0404341  |
| -        | 27:36198088-36211950 | 2441.94   | 11383.6  | 2.22086  | 336.543  | 5.00E-05 | 0.00168949 |
| AGPAT6   | 27:36212254-36229009 | 67.5437   | 225.722  | 1.74066  | 3.1339   | 5.00E-05 | 0.00168949 |
| AP3M2    | 27:36716828-36734481 | 0.367138  | 2.20608  | 2.58709  | 2.49321  | 0.0001   | 0.00298488 |
| IKBKB    | 27:36813158-36865778 | 25.9089   | 75.4165  | 1.54144  | 2.38255  | 5.00E-05 | 0.00168949 |
| POLB     | 27:36877979-36902798 | 15.8787   | 69.9165  | 2.13854  | 3.7271   | 5.00E-05 | 0.00168949 |
| VDAC5P   | 27:36921285-36933273 | 70.6691   | 153.943  | 1.12325  | 1.9732   | 0.0009   | 0.015665   |
| TAP      | 27:4788446-4992414   | 16.7175   | 462.378  | 4.78965  | 4.84963  | 5.00E-05 | 0.00168949 |
| DEFB4A   | 27:5425377-5427298   | 1417.4    | 656.6    | -1.11016 | -6.22335 | 0.00155  | 0.0233854  |
| EBD      | 27:5483407-5539158   | 74.0001   | 35.7847  | -1.04819 | -2.75905 | 0.0017   | 0.0250202  |
| BT.26980 | 27:6194469-6196146   | 866.614   | 4034.61  | 2.21897  | 282.514  | 0.0011   | 0.0181408  |
| CASP3    | 27:14084621-14110610 | 7.09539   | 20.9018  | 1.55867  | 2.92809  | 5.00E-05 | 0.00168949 |
| FAT1     | 27:15477548-15604015 | 3.10772   | 1.23503  | -1.33131 | -1.97942 | 0.00065  | 0.0121886  |
| VPS37A   | 27:18914042-19052353 | 13.1589   | 40.8576  | 1.63457  | 3.6707   | 5.00E-05 | 0.00168949 |
| ZDHHC2   | 27:19073727-19136692 | 12.0063   | 25.0989  | 1.06383  | 1.91665  | 0.00305  | 0.0378715  |
| BT.63339 | 27:20419471-20636849 | 0.771459  | 2.81938  | 1.86972  | 1.8895   | 0.0031   | 0.0382177  |
| PPP1R3B  | 27:24316622-24323722 | 26.4524   | 100.731  | 1.92903  | 2.96381  | 5.00E-05 | 0.00168949 |
| BT.35049 | 27:28450184-28459083 | 22.2742   | 57.9567  | 1.3796   | 2.41036  | 0.0015   | 0.00417103 |
| RET      | 28:13562992-13615888 | 0.130085  | 0.700372 | 2.42866  | 1.86932  | 0.0026   | 0.0338024  |
| ARID5B   | 28:18003693-18191994 | 16.6306   | 43.872   | 1.39946  | 2.12213  | 0.00025  | 0.0060614  |
| SIRT1    | 28:24556214-24582756 | 4.81953   | 10.8543  | 1.1713   | 2.02367  | 0.00135  | 0.0210576  |
| CHST3    | 28:28223870-28259688 | 1.15455   | 4.08207  | 1.82197  | 1.79636  | 0.0018   | 0.026296   |
| DDIT4    | 28:28483402-28485410 | 174.706   | 1033.39  | 2.56439  | 3.98569  | 5.00E-05 | 0.00168949 |
| PLAU     | 28:29962495-29971029 | 262.214   | 1023.29  | 1.96439  | 2.04927  | 0.00025  | 0.0060614  |
| PPIF     | 28:35167544-35173642 | 44.7104   | 96.4041  | 1.10848  | 3.66613  | 0.00095  | 0.0163093  |
| RHOA     | 28:2167763-2177307   | 10.467    | 24.3344  | 1.21715  | 2.24734  | 0.00085  | 0.0150217  |
| -        | 28:3153786-3155107   | 240.903   | 1611.85  | 2.74219  | 243.423  | 0.0016   | 0.023879   |
| ARID4B   | 28:7972873-8110783   | 14.7204   | 34.7053  | 1.23735  | 2.02944  | 0.0005   | 0.0101767  |
| GNG4     | 28:8340142-8408990   | 0.284556  | 1.92655  | 2.75923  | 2.64633  | 0.0001   | 0.00298488 |
| LYST     | 28:8417602-8598463   | 109.283   | 2580.93  | 4.56175  | 17.1264  | 5.00E-05 | 0.00168949 |
| RASGEF1A | 28:13680210-13725902 | 33.3966   | 15.9282  | -1.06812 | -1.71569 | 0.0021   | 0.0292856  |
| ANK3     | 28:15818094-16073196 | 1.3926    | 5.76192  | 2.04877  | 2.5825   | 5.00E-05 | 0.00168949 |
| DNAJC12  | 28:24397287-24447263 | 72.0636   | 272.015  | 1.91634  | 2.60965  | 5.00E-05 | 0.00168949 |

|                 |                      |          |          |           |          |          |            |
|-----------------|----------------------|----------|----------|-----------|----------|----------|------------|
| PPA1            | 28:26576201-26614511 | 41.9588  | 93.0322  | 1.14876   | 2.72094  | 0.00075  | 0.0136024  |
| PCBD1           | 28:27226794-27231724 | 23.3222  | 50.1968  | 1.10589   | 2.7096   | 0.00255  | 0.0334038  |
| MMRN2           | 28:41886523-41901491 | 3.90257  | 1.44975  | -1.42862  | -2.14246 | 0.0011   | 0.0181408  |
| NCOA4           | 28:44419335-44441664 | 59.3973  | 151.769  | 1.35341   | 2.13594  | 0.00035  | 0.00778905 |
| ALOX5           | 28:44729722-44776997 | 19.7517  | 8.84569  | -1.15893  | -2.02295 | 0.0006   | 0.0116461  |
| BT.43006        | 29:9806834-9927317   | 5.37127  | 17.8121  | 1.72952   | 2.29624  | 5.00E-05 | 0.00168949 |
| GAB2            | 29:17544438-17887917 | 61.4085  | 151.042  | 1.29844   | 1.75125  | 0.0009   | 0.015665   |
| VWA5A           | 29:27193398-27221915 | 40.1204  | 11.5239  | -1.79971  | -2.8159  | 5.00E-05 | 0.00168949 |
| BT.25683        | 29:40648858-40657395 | 0        | 0.681571 | inf       | nan      | 5.00E-05 | 0.00168949 |
| SCGB1D          | 29:41378326-41381132 | 218.52   | 805.455  | 1.88204   | 11.6068  | 5.00E-05 | 0.00168949 |
| SCGB2A2         | 29:41396638-41400056 | 9.99629  | 32.7601  | 1.71247   | 5.67471  | 0.002    | 0.0280894  |
| -               | 29:43742805-43746517 | 1664.58  | 6244.28  | 1.90738   | 295.74   | 5.00E-05 | 0.00168949 |
| -               | 29:44297409-44299689 | 34.3817  | 199.625  | 2.53758   | 2.22385  | 0.0001   | 0.00298488 |
| -               | 29:46717120-46717697 | 0        | 321.372  | inf       | nan      | 5.00E-05 | 0.00168949 |
| -               | 29:50151791-50152665 | 0        | 11.3485  | inf       | nan      | 5.00E-05 | 0.00168949 |
| IFITM3          | 29:51367008-51368065 | 1069.79  | 3229.75  | 1.5941    | 4.36828  | 0.0012   | 0.0192837  |
| SAA3            | 29:26668046-26671801 | 90.7206  | 202.129  | 1.15577   | 1.78881  | 0.00125  | 0.0198792  |
| BT.44411        | 29:43589926-43605003 | 4.94028  | 16.6741  | 1.75495   | 2.55802  | 5.00E-05 | 0.00168949 |
| EHD1            | 29:43703965-43708218 | 55.8439  | 145.352  | 1.38008   | 2.27656  | 0.0001   | 0.00298488 |
| CLCF1           | 29:45910396-45912701 | 42.7934  | 13.9557  | -1.61653  | -4.42683 | 0.00015  | 0.00417103 |
| ALDH3B2         | 29:46143362-46150328 | 5.42169  | 20.0908  | 1.88972   | 2.40047  | 0.0001   | 0.00298488 |
| CHKA            | 29:46225619-46281621 | 19.9998  | 43.9109  | 1.13459   | 1.86044  | 0.00245  | 0.0325567  |
| BT.30964        | 29:46315559-46381073 | 19.0286  | 39.2332  | 1.04391   | 1.87443  | 0.00145  | 0.0222656  |
| ENSBTAG0000004  | 29:46967273-46972900 | 5.84403  | 21.1834  | 1.8579    | 2.35303  | 0.00015  | 0.00417103 |
| BT.27443        | 29:49332571-49353894 | 12.1019  | 3.35616  | -1.85035  | -2.47554 | 0.0001   | 0.00298488 |
| BT.51424        | 29:49842960-49860405 | 385.035  | 838.992  | 1.12367   | 1.74179  | 0.00285  | 0.0362346  |
| -               | 29:50864722-50869844 | 407.469  | 2282.14  | 2.48562   | 6.08985  | 0.00025  | 0.0060614  |
| FCGR3A          | 3:7996470-8005228    | 18.3677  | 64.1614  | 1.80454   | 2.3862   | 0.0001   | 0.00298488 |
| BT.45096        | 3:8879269-8892720    | 53.6248  | 27.2759  | -0.975274 | -1.68388 | 0.0031   | 0.0382177  |
| CD48            | 3:9022903-9053379    | 116.227  | 365.441  | 1.65269   | 4.16791  | 5.00E-05 | 0.00168949 |
| SLAMF1          | 3:9090440-9129487    | 0.878879 | 10.3207  | 3.55373   | 3.9305   | 5.00E-05 | 0.00168949 |
| MUC1            | 3:15482821-15486936  | 27.3614  | 96.9395  | 1.82494   | 2.43995  | 5.00E-05 | 0.00168949 |
| RAB13           | 3:16511099-16515182  | 8.76312  | 19.2619  | 1.13623   | 2.34224  | 0.0031   | 0.0382177  |
| CRTC2           | 3:16535365-16544863  | 22.1664  | 52.9445  | 1.25611   | 1.96764  | 0.0002   | 0.00512801 |
| S100A8          | 3:17146917-17147898  | 972.78   | 2326.91  | 1.25823   | 10.3822  | 0.0016   | 0.023879   |
| -               | 3:20199631-20227547  | 7.4962   | 66.1753  | 3.14206   | 2.531    | 0.0001   | 0.00298488 |
| BT.76892        | 3:20656592-20712080  | 1.50758  | 4.31465  | 1.51701   | 2.04242  | 0.00065  | 0.0121886  |
| AMPD1           | 3:28756907-28768496  | 0.110819 | 0.958916 | 3.1132    | 2.79402  | 0.003    | 0.0373514  |
| BCL2L15         | 3:29643175-29648016  | 39.5217  | 84.2742  | 1.09245   | 3.01496  | 0.0026   | 0.0338024  |
| ADORA3          | 3:31900283-31991118  | 37.8899  | 13.6808  | -1.46966  | -2.91047 | 5.00E-05 | 0.00168949 |
| BT.101639,OVGP1 | 3:32020913-32059347  | 10.6238  | 25.7844  | 1.2792    | 2.28168  | 0.0007   | 0.0128987  |

|                |                       |          |          |          |          |          |            |
|----------------|-----------------------|----------|----------|----------|----------|----------|------------|
| AKNAD1         | 3:34631047-34675858   | 0.497744 | 0.101475 | -2.29427 | -1.6172  | 0.0029   | 0.0365009  |
| F3             | 3:49110155-49121034   | 3.7666   | 25.4723  | 2.7576   | 3.66877  | 5.00E-05 | 0.00168949 |
| GBP5           | 3:54253031-54269514   | 9.5705   | 63.2799  | 2.72508  | 3.53377  | 5.00E-05 | 0.00168949 |
| BT.24012       | 3:55063829-55085745   | 17.2741  | 46.24    | 1.42053  | 2.1337   | 0.0004   | 0.00870551 |
| BT.39806       | 3:55179368-55210377   | 35.0266  | 187.193  | 2.418    | 5.34424  | 5.00E-05 | 0.00168949 |
| MCOLN2         | 3:59286294-59351124   | 1.57793  | 6.03272  | 1.93478  | 2.69139  | 0.00015  | 0.00417103 |
| LPAR3          | 3:59377051-59459794   | 0.713947 | 2.8697   | 2.00701  | 2.09144  | 0.00305  | 0.0378715  |
| WLS            | 3:77396242-77511241   | 73.5993  | 300.872  | 2.03138  | 2.67751  | 5.00E-05 | 0.00168949 |
| BT.67031       | 3:80775671-80915019   | 92.5053  | 212.516  | 1.19996  | 1.71989  | 0.00435  | 0.0491152  |
| BT.45850       | 3:92411759-92576787   | 4.28582  | 9.40613  | 1.13403  | 1.59371  | 0.0043   | 0.0488299  |
| BT.42861       | 3:98370382-98536867   | 7.71231  | 16.231   | 1.07352  | 1.70512  | 0.0029   | 0.0365009  |
| BT.21055       | 3:100126200-100172587 | 58.48    | 224.331  | 1.93962  | 2.63955  | 0.0001   | 0.00298488 |
| SLC6A9         | 3:102623350-102659082 | 43.9821  | 174.937  | 1.99185  | 2.86782  | 5.00E-05 | 0.00168949 |
| C3H1ORF210     | 3:103318856-103327560 | 10.8587  | 30.1359  | 1.47264  | 1.8327   | 0.00235  | 0.03147    |
| SLC2A1         | 3:103902889-103931096 | 79.5945  | 179.865  | 1.17618  | 2.09116  | 0.00375  | 0.044144   |
| HIVEP3         | 3:105213589-105268006 | 8.27296  | 18.6467  | 1.17245  | 1.64313  | 0.0014   | 0.0216421  |
| CSF3R          | 3:109993814-110014737 | 224.922  | 942.911  | 2.0677   | 1.75534  | 0.001    | 0.0169155  |
| MRPS15,OSCP1   | 3:110014937-110055110 | 55.3985  | 160.747  | 1.53687  | 3.70252  | 5.00E-05 | 0.00168949 |
| COL8A2         | 3:110280034-110302198 | 4.90771  | 1.45267  | -1.75634 | -2.0014  | 0.00045  | 0.00945137 |
| EFHD1          | 3:113006124-113050192 | 24.1458  | 57.5827  | 1.25386  | 2.15249  | 0.00195  | 0.0276684  |
| BT.66090       | 3:115132606-115232304 | 16.6915  | 40.274   | 1.27073  | 1.70021  | 0.00195  | 0.0276684  |
| CXCR7          | 3:116650277-116662501 | 0.870015 | 6.52345  | 2.90652  | 4.29571  | 5.00E-05 | 0.00168949 |
| BT.29245       | 3:117584072-117637812 | 1.06293  | 5.98188  | 2.49256  | 2.90914  | 5.00E-05 | 0.00168949 |
| CSF2RA         | 3:119457276-119467374 | 61.1222  | 164.205  | 1.42573  | 2.0585   | 0.0003   | 0.00696807 |
| FCRLA          | 3:7898359-7904866     | 0.868531 | 5.96619  | 2.78016  | 2.11712  | 0.0006   | 0.0116461  |
| ENSBTAG0000003 | 3:12170092-12189927   | 13.3965  | 3.76722  | -1.83029 | -2.56621 | 0.00025  | 0.0060614  |
| -              | 3:13100571-13104482   | 387.64   | 0        | -inf     | nan      | 0.0027   | 0.0347754  |
| RAB25          | 3:14755581-14762653   | 13.9815  | 37.3553  | 1.41779  | 2.17479  | 0.0003   | 0.00696807 |
| RXFP4          | 3:14871053-14872623   | 4.26849  | 11.7757  | 1.46401  | 2.84704  | 0.00215  | 0.029713   |
| BT.68623       | 3:16176558-16231747   | 22.1779  | 45.8208  | 1.04688  | 1.59338  | 0.0033   | 0.0400404  |
| -              | 3:17742181-17743044   | 0        | 5646.02  | inf      | nan      | 5.00E-05 | 0.00168949 |
| -              | 3:17753430-17754283   | 0        | 4461.32  | inf      | nan      | 0.0014   | 0.0216421  |
| CGN            | 3:19290675-19315945   | 1.53575  | 4.87507  | 1.66648  | 2.18713  | 0.00015  | 0.00417103 |
| PIP5K1A        | 3:19613994-19653222   | 11.2226  | 21.7448  | 0.954263 | 1.71428  | 0.0044   | 0.0493571  |
| C1ORF51        | 3:20400968-20404346   | 1.66625  | 10.7965  | 2.69589  | 2.99051  | 5.00E-05 | 0.00168949 |
| FAM46C         | 3:25703049-25722965   | 4.91403  | 14.4345  | 1.55455  | 2.08278  | 0.00055  | 0.0109367  |
| CD101          | 3:26317280-26364621   | 6.40275  | 27.8797  | 2.12245  | 3.15957  | 5.00E-05 | 0.00168949 |
| -              | 3:28590778-28595584   | 0        | 2.87886  | inf      | nan      | 0.0002   | 0.00512801 |
| ENSBTAG0000003 | 3:28623390-28623702   | 20.036   | 0        | -inf     | nan      | 5.00E-05 | 0.00168949 |
| -              | 3:31991617-31996063   | 1361.03  | 7264.46  | 2.41616  | 10.2308  | 5.00E-05 | 0.00168949 |
| CSF1           | 3:33603162-33621087   | 106.026  | 715.149  | 2.75382  | 2.64922  | 5.00E-05 | 0.00168949 |

|           |                       |          |          |          |          |          |            |
|-----------|-----------------------|----------|----------|----------|----------|----------|------------|
| GSTM4     | 3:33874018-33880598   | 2.54832  | 11.3171  | 2.15089  | 2.22985  | 0.00025  | 0.0060614  |
| BT.105016 | 3:34246148-34270501   | 1.32986  | 4.43294  | 1.73699  | 2.53093  | 5.00E-05 | 0.00168949 |
| KIAA1324  | 3:34313871-34387455   | 1.47726  | 4.84525  | 1.71365  | 2.27857  | 0.0001   | 0.00298488 |
| LPHN2     | 3:62643352-62946195   | 0.576852 | 1.89348  | 1.71477  | 2.04446  | 0.0008   | 0.0143027  |
| IFI44     | 3:66277937-66299876   | 33.3444  | 12.433   | -1.42327 | -2.44698 | 5.00E-05 | 0.00168949 |
| GIPC2     | 3:66795566-66895377   | 4.20471  | 13.2667  | 1.65773  | 2.12755  | 0.0005   | 0.0101767  |
| -         | 3:68361329-68612507   | 0        | 46.2839  | inf      | nan      | 5.00E-05 | 0.00168949 |
| -         | 3:79233485-79257796   | 6.98653  | 35.3985  | 2.34104  | 2.74378  | 0.0001   | 0.00298488 |
| PDE4B     | 3:79274270-79823433   | 40.8141  | 243.597  | 2.57736  | 3.07491  | 5.00E-05 | 0.00168949 |
| INADL     | 3:84099475-84479712   | 3.20358  | 15.6028  | 2.28405  | 2.04484  | 0.00025  | 0.0060614  |
| HOOK1     | 3:86650797-86718972   | 2.86585  | 12.2355  | 2.09404  | 2.70297  | 5.00E-05 | 0.00168949 |
| BT.104733 | 3:102526630-102599425 | 0.930431 | 12.3303  | 3.72817  | 3.2889   | 5.00E-05 | 0.00168949 |
| SIAT6     | 3:102718270-102769948 | 15.8997  | 46.1968  | 1.53879  | 2.75169  | 5.00E-05 | 0.00168949 |
| KDM4A     | 3:102799453-102966062 | 47.5373  | 137.098  | 1.52807  | 2.80999  | 0.00075  | 0.0136024  |
| TMEM125   | 3:103337707-103340965 | 5.54499  | 16.767   | 1.59636  | 2.20897  | 0.0005   | 0.0101767  |
| CTPS      | 3:105800996-105832415 | 2.6909   | 6.75115  | 1.32704  | 2.01299  | 0.0006   | 0.0116461  |
| RLF       | 3:106496804-106576048 | 10.5832  | 53.2491  | 2.33098  | 3.39426  | 5.00E-05 | 0.00168949 |
| ZC3H12A   | 3:108990073-108999454 | 19.2369  | 54.6344  | 1.50594  | 2.30958  | 0.0001   | 0.00298488 |
| IQCA1     | 3:116402593-116592405 | 3.0201   | 0.823245 | -1.8752  | -2.09725 | 0.00055  | 0.0109367  |
| ARL4A     | 4:20295728-20297969   | 12.8538  | 33.3567  | 1.37578  | 2.21834  | 0.00035  | 0.00778905 |
| TSPAN13   | 4:25213087-25251241   | 17.7358  | 39.1501  | 1.14235  | 2.62982  | 0.00025  | 0.0060614  |
| RUNDC3B   | 4:32691261-32858257   | 0.161744 | 0.737831 | 2.18958  | 2.10447  | 0.0012   | 0.0192837  |
| SEMA3A    | 4:36260451-36807404   | 12.5433  | 5.20262  | -1.26961 | -2.13237 | 0.00055  | 0.0109367  |
| PION      | 4:44045079-44198584   | 11.8665  | 47.6283  | 2.00493  | 3.60213  | 5.00E-05 | 0.00168949 |
| PRKAR2B   | 4:48434954-48535433   | 4.51203  | 14.0013  | 1.63372  | 2.97086  | 5.00E-05 | 0.00168949 |
| BT.64791  | 4:60940662-61125662   | 8.15833  | 20.9495  | 1.36057  | 1.93912  | 0.00145  | 0.0222656  |
| MYO1G     | 4:77317208-77333095   | 103.145  | 43.139   | -1.25761 | -2.25624 | 0.00045  | 0.00945137 |
| GCK       | 4:77820948-77857151   | 10.8812  | 34.6096  | 1.66934  | 2.59902  | 5.00E-05 | 0.00168949 |
| INHBA     | 4:79983847-79997754   | 4.02652  | 19.7514  | 2.29435  | 2.88823  | 5.00E-05 | 0.00168949 |
| TMEM140   | 4:99699887-99719088   | 25.3632  | 99.4392  | 1.97108  | 3.21509  | 0.0001   | 0.00298488 |
| MGAM      | 4:106115756-106206212 | 2.91976  | 6.68245  | 1.19453  | 1.89898  | 0.0011   | 0.0181408  |
| BT.18132  | 4:108440617-108471244 | 0.915216 | 2.3587   | 1.36581  | 1.6794   | 0.0023   | 0.0310714  |
| BT.20772  | 4:114075506-114086267 | 1.35707  | 5.08924  | 1.90696  | 1.99199  | 0.0013   | 0.0203927  |
| NUB1      | 4:114689766-114725191 | 39.2171  | 118.953  | 1.60084  | 2.84464  | 0.00025  | 0.0060614  |
| GALNT11   | 4:115306056-115360689 | 11.39    | 28.147   | 1.30521  | 2.43519  | 0.0002   | 0.00512801 |
| BT.20327  | 4:7528099-7556554     | 102.227  | 423.839  | 2.05174  | 2.86535  | 5.00E-05 | 0.00168949 |
| TFPI2     | 4:11035478-11039782   | 0.362472 | 2.74862  | 2.92277  | 3.31448  | 0.00135  | 0.0210576  |
| BT.66886  | 4:25258618-25271426   | 4.03185  | 13.6051  | 1.75464  | 2.02576  | 0.00225  | 0.0305452  |
| -         | 4:31643942-31651050   | 1210.02  | 4161.78  | 1.78217  | 262.992  | 0.001    | 0.0169155  |
| IGF2BP3   | 4:32077890-32223053   | 0.896321 | 0.243842 | -1.87807 | -1.7087  | 0.0031   | 0.0382177  |
| PNPLA8    | 4:49866429-49916582   | 11.6073  | 23.9517  | 1.04509  | 1.82461  | 0.00255  | 0.0334038  |

|                |                       |          |          |           |          |          |            |
|----------------|-----------------------|----------|----------|-----------|----------|----------|------------|
| C4H7orf41      | 4:66610954-66643765   | 3.34495  | 7.4616   | 1.1575    | 1.99003  | 0.002    | 0.0280894  |
| -              | 4:70011729-70037099   | 0        | 53.342   | inf       | nan      | 5.00E-05 | 0.00168949 |
| NFE2L3         | 4:70211379-70246125   | 8.23839  | 20.5565  | 1.31916   | 2.18721  | 0.00015  | 0.00417103 |
| STEAP4         | 4:72833496-72862043   | 16.4877  | 150.003  | 3.18553   | 6.60787  | 5.00E-05 | 0.00168949 |
| CADPS2         | 4:87522150-88100974   | 0.844281 | 2.42594  | 1.52275   | 1.95336  | 0.00145  | 0.0222656  |
| UBE2H          | 4:94467622-94565768   | 23.355   | 46.9812  | 1.00835   | 2.49335  | 0.0022   | 0.0300732  |
| JHDM1D         | 4:104370183-104520655 | 12.8615  | 29.2017  | 1.18299   | 2.01117  | 0.0008   | 0.0143027  |
| BRAF           | 4:104864931-105031570 | 7.42811  | 33.3321  | 2.16585   | 3.66228  | 5.00E-05 | 0.00168949 |
| BT.40997       | 4:107804451-107821622 | 0.351658 | 1.34833  | 1.93893   | 2.07548  | 0.00245  | 0.0325567  |
| EZH2           | 4:112815326-112870132 | 20.1015  | 64.7838  | 1.68833   | 2.78711  | 5.00E-05 | 0.00168949 |
| BT.104098      | 5:10731240-11118179   | 17.7523  | 9.02941  | -0.975306 | -1.72042 | 0.0041   | 0.0471398  |
| NFE2           | 5:25929034-25936083   | 38.1783  | 206.508  | 2.43538   | 2.77271  | 5.00E-05 | 0.00168949 |
| ITGB7          | 5:26957785-26973297   | 35.6545  | 80.4143  | 1.17337   | 1.64851  | 0.0041   | 0.0471398  |
| FMNL3          | 5:30320680-30372554   | 49.9197  | 146.758  | 1.55576   | 2.31753  | 5.00E-05 | 0.00168949 |
| RND1           | 5:31090624-31097555   | 1.46815  | 8.97678  | 2.6122    | 3.7591   | 5.00E-05 | 0.00168949 |
| BT.61413       | 5:31155390-31176231   | 1.90804  | 4.6695   | 1.29118   | 1.50622  | 0.00345  | 0.0413521  |
| CCNT1          | 5:31221135-31257293   | 11.8953  | 27.0443  | 1.18493   | 1.95948  | 0.0004   | 0.00870551 |
| BT.61412       | 5:32550520-32606144   | 38.2362  | 76.8998  | 1.00804   | 2.08289  | 0.0039   | 0.045599   |
| NELL2          | 5:35656888-36042694   | 3.65806  | 14.1894  | 1.95567   | 3.17432  | 5.00E-05 | 0.00168949 |
| BT.105308      | 5:41964154-42147586   | 0.422569 | 1.79845  | 2.08949   | 2.20409  | 0.00025  | 0.0060614  |
| AVIL           | 5:55983553-56002079   | 0.4844   | 3.79663  | 2.97045   | 2.309    | 0.0002   | 0.00512801 |
| BT.87427       | 5:57428165-57454003   | 43.3939  | 106.502  | 1.29532   | 2.24797  | 0.00025  | 0.0060614  |
| C12ORF63       | 5:61225294-61406864   | 0.417215 | 3.34151  | 3.00164   | 2.04899  | 0.00065  | 0.0121886  |
| CHST11         | 5:68385644-68645774   | 26.436   | 64.8806  | 1.29528   | 2.09491  | 0.0003   | 0.00696807 |
| TCP11L2        | 5:70013666-70054229   | 2.35396  | 5.32036  | 1.17644   | 2.14755  | 0.0013   | 0.0203927  |
| TIMP3          | 5:71475846-71926718   | 3.7093   | 11.8117  | 1.67101   | 2.60932  | 5.00E-05 | 0.00168949 |
| NCF4           | 5:75641216-75659769   | 66.0657  | 193.569  | 1.55087   | 3.01963  | 5.00E-05 | 0.00168949 |
| CSF2RB         | 5:75724562-75745890   | 85.077   | 382.565  | 2.16886   | 2.43314  | 5.00E-05 | 0.00168949 |
| CYTH4          | 5:76080278-76117408   | 72.9748  | 229.856  | 1.65526   | 1.91224  | 0.0004   | 0.00870551 |
| BT.70677       | 5:78552286-78637341   | 1.54387  | 3.78256  | 1.29281   | 1.8946   | 0.0044   | 0.0493571  |
| CAPRIN2        | 5:79165892-79258697   | 0.103577 | 0.490964 | 2.24492   | 1.67381  | 0.00095  | 0.0163093  |
| SLCO1A2        | 5:89199216-89311142   | 4.81932  | 12.9518  | 1.42625   | 2.64773  | 5.00E-05 | 0.00168949 |
| EPS8           | 5:94553809-94749093   | 15.5678  | 6.10635  | -1.35018  | -2.14475 | 0.00015  | 0.00417103 |
| BT.76070       | 5:99102506-99103394   | 8.00532  | 27.1814  | 1.76359   | 4.10419  | 0.00015  | 0.00417103 |
| -              | 5:100411693-100435325 | 1.61918  | 7.76671  | 2.26204   | 2.16977  | 0.001    | 0.0169155  |
| CD69,ENSBTAG00 | 5:100740573-100779160 | 44.9525  | 312.284  | 2.79639   | 3.36834  | 5.00E-05 | 0.00168949 |
| -              | 5:101930839-101948265 | 39.7164  | 187.216  | 2.2369    | 1.23941  | 0.0022   | 0.0300732  |
| -              | 5:101948941-101999566 | 143.661  | 1898.45  | 3.72408   | 3.04796  | 0.00375  | 0.044144   |
| NECAP1         | 5:102050907-102062664 | 19.2546  | 42.1257  | 1.1295    | 2.0751   | 0.00055  | 0.0109367  |
| ACRBP          | 5:104153957-104161646 | 12.4567  | 5.01527  | -1.31253  | -1.98591 | 0.00065  | 0.0121886  |
| LPAR5          | 5:104163206-104173568 | 5.70399  | 2.11464  | -1.43156  | -1.93102 | 0.00155  | 0.0233854  |



|                |                       |          |         |           |          |          |            |
|----------------|-----------------------|----------|---------|-----------|----------|----------|------------|
| SCNN1A         | 5:104364799-104396610 | 1.56689  | 5.6287  | 1.8449    | 2.3169   | 5.00E-05 | 0.00168949 |
| VWF            | 5:104603431-104727301 | 61.5836  | 27.1828 | -1.17985  | -1.8023  | 0.00235  | 0.03147    |
| EFCAB4B,PARP11 | 5:106604204-106765623 | 12.4325  | 29.4105 | 1.24222   | 1.95533  | 0.00145  | 0.0222656  |
| TSPAN11        | 5:106975936-107038059 | 34.828   | 17.9257 | -0.958218 | -1.65548 | 0.0038   | 0.0446185  |
| B4GALNT3       | 5:107901713-107934878 | 2.567    | 8.30987 | 1.69475   | 2.33887  | 5.00E-05 | 0.00168949 |
| GCAT           | 5:110125414-110132060 | 10.3007  | 30.0491 | 1.54458   | 2.22211  | 0.00025  | 0.0060614  |
| MAFF           | 5:110475505-110484826 | 13.9592  | 50.5179 | 1.85558   | 2.90226  | 5.00E-05 | 0.00168949 |
| GTPBP1         | 5:110846348-110870042 | 12.6834  | 37.6274 | 1.56884   | 2.41807  | 0.00015  | 0.00417103 |
| BT.48025       | 5:111044939-111048603 | 153.472  | 352.411 | 1.19928   | 1.78311  | 0.0019   | 0.0272104  |
| BT.76048       | 5:111462844-111464936 | 295.41   | 939.514 | 1.6692    | 2.07615  | 0.001    | 0.0169155  |
| BT.37218       | 5:116316366-116335303 | 40.1415  | 87.0492 | 1.11674   | 2.22575  | 0.00135  | 0.0210576  |
| PIM3           | 5:120970010-120973246 | 85.1392  | 212.187 | 1.31744   | 2.66726  | 0.0009   | 0.015665   |
| -              | 5:7310912-7311116     | 641.122  | 0       | -inf      | nan      | 0.0029   | 0.0365009  |
| DUSP6          | 5:19276347-19280070   | 137.788  | 353.58  | 1.35959   | 1.71874  | 0.00365  | 0.0433359  |
| BTG1           | 5:21900979-22088781   | 267.69   | 836.401 | 1.64363   | 2.03613  | 0.0009   | 0.015665   |
| BT.87397       | 5:24928041-25031318   | 1.74879  | 4.19289 | 1.26159   | 1.77083  | 0.00195  | 0.0276684  |
| ACVR1B         | 5:28038531-28070153   | 27.3856  | 135.411 | 2.30586   | 3.55431  | 5.00E-05 | 0.00168949 |
| BT.28710       | 5:28097836-28111514   | 2.47632  | 10.0237 | 2.01715   | 2.68814  | 5.00E-05 | 0.00168949 |
| GPD1           | 5:29958500-29964790   | 25.5566  | 69.2707 | 1.43855   | 2.12189  | 0.00115  | 0.0186976  |
| C5H12orf68     | 5:32277007-32278883   | 0.576109 | 6.54378 | 3.50571   | 4.06502  | 5.00E-05 | 0.00168949 |
| SLC48A1        | 5:32630915-32676306   | 43.857   | 18.5913 | -1.23818  | -1.78223 | 0.0032   | 0.0392405  |
| FAM113B        | 5:33141573-33339728   | 5.39753  | 40.21   | 2.89718   | 8.36808  | 5.00E-05 | 0.00168949 |
| LRRK2          | 5:40703504-40916225   | 7.39613  | 16.4933 | 1.15704   | 1.93202  | 0.002    | 0.0280894  |
| BT.51933       | 5:43746463-43881004   | 0.321379 | 3.22359 | 3.32632   | 3.5314   | 5.00E-05 | 0.00168949 |
| RAB3IP         | 5:43887152-43944943   | 70.3104  | 382.345 | 2.44306   | 2.80117  | 5.00E-05 | 0.00168949 |
| USP15          | 5:51380095-51510100   | 49.0257  | 143.333 | 1.54776   | 1.99142  | 0.001    | 0.0169155  |
| SLC16A7        | 5:53987908-54214799   | 0.590204 | 2.06833 | 1.80918   | 2.57686  | 0.00185  | 0.0267998  |
| IL23A          | 5:57333495-57335062   | 11.7603  | 30.7863 | 1.38837   | 1.68721  | 0.0018   | 0.026296   |
| PAH            | 5:66950500-67040705   | 27.345   | 99.2282 | 1.85947   | 3.06239  | 5.00E-05 | 0.00168949 |
| FOXRED2        | 5:75275059-75293236   | 9.8054   | 4.09599 | -1.25936  | -1.9684  | 0.00085  | 0.0150217  |
| IL2RB          | 5:75927871-75967613   | 2.26822  | 11.2079 | 2.30488   | 1.80597  | 0.00225  | 0.0305452  |
| BICD1          | 5:77857447-78101845   | 0.424358 | 4.13826 | 3.28567   | 3.33307  | 5.00E-05 | 0.00168949 |
| C5H12orf35     | 5:78299381-78326559   | 5.77867  | 14.9408 | 1.37045   | 2.21369  | 0.00045  | 0.00945137 |
| STK38L         | 5:82972062-83055318   | 13.6175  | 35.001  | 1.36193   | 1.96944  | 0.00105  | 0.0176318  |
| PIK3C2G        | 5:91835145-92300259   | 0.763995 | 2.58254 | 1.75716   | 1.87053  | 0.00205  | 0.0286751  |
| APOLD1         | 5:97520909-97526540   | 2.24114  | 6.00646 | 1.42228   | 2.31409  | 0.00045  | 0.00945137 |
| GABARAPL1      | 5:100205185-100215034 | 55.9096  | 189.588 | 1.7617    | 3.12453  | 5.00E-05 | 0.00168949 |
| -              | 5:100823210-100849800 | 0.803761 | 5.20564 | 2.69524   | 1.76035  | 0.0019   | 0.0272104  |
| SLC2A3         | 5:101896621-101909500 | 294.453  | 2349.74 | 2.99639   | 3.05253  | 0.00125  | 0.0198792  |
| BT.98677       | 5:104273437-104300410 | 10.8099  | 40.9548 | 1.92167   | 2.488    | 0.0001   | 0.00298488 |
| CCND2          | 5:106253906-106277822 | 7.67494  | 20.0356 | 1.38434   | 1.89118  | 0.00095  | 0.0163093  |

|                |                       |          |          |           |          |          |            |
|----------------|-----------------------|----------|----------|-----------|----------|----------|------------|
| KDM5A          | 5:107730639-107791602 | 8.83107  | 18.8661  | 1.09514   | 1.78279  | 0.00275  | 0.0352551  |
| -              | 5:109560948-109561719 | 0        | 355.271  | inf       | nan      | 5.00E-05 | 0.00168949 |
| SOX10          | 5:110261031-110280622 | 9.30459  | 20.6998  | 1.15361   | 1.73963  | 0.0042   | 0.0479306  |
| JOSD1          | 5:110829051-110840263 | 27.4446  | 58.0711  | 1.0813    | 1.7631   | 0.00185  | 0.0267998  |
| CYP2D14        | 5:113621621-113625976 | 33.5066  | 17.1783  | -0.963859 | -1.63661 | 0.00325  | 0.0397126  |
| NFAM1          | 5:113836090-113882202 | 82.0992  | 191.177  | 1.21947   | 1.71557  | 0.00095  | 0.0163093  |
| A4GALT         | 5:114071761-114096206 | 1.23054  | 5.50236  | 2.16075   | 2.19437  | 0.0005   | 0.0101767  |
| ENSBTAG000000C | 5:114966365-115060319 | 1.44654  | 7.46186  | 2.36693   | 2.79331  | 0.0002   | 0.00512801 |
| CPT1B          | 5:120098391-120106718 | 11.6131  | 3.43939  | -1.75553  | -2.81647 | 5.00E-05 | 0.00168949 |
| IL17REL        | 5:120992218-121010327 | 15.9534  | 48.2933  | 1.59796   | 2.30003  | 0.00025  | 0.0060614  |
| C4ORF3         | 6:7145413-7150482     | 95.2785  | 196.336  | 1.0431    | 2.52722  | 0.0027   | 0.0347754  |
| SLC39A8        | 6:23815386-23898886   | 36.4736  | 121.768  | 1.73921   | 3.07855  | 5.00E-05 | 0.00168949 |
| ABCG2          | 6:37903128-38030583   | 28.1404  | 94.3204  | 1.74493   | 2.55439  | 5.00E-05 | 0.00168949 |
| BT.61466       | 6:46724497-46749777   | 11.182   | 37.0524  | 1.72839   | 2.39099  | 5.00E-05 | 0.00168949 |
| BT.22022       | 6:58486539-58565108   | 2.65048  | 6.27487  | 1.24333   | 1.62689  | 0.0044   | 0.0493571  |
| BT.53393       | 6:60848685-60896785   | 4.86704  | 55.6961  | 3.51646   | 4.94107  | 5.00E-05 | 0.00168949 |
| IL-8           | 6:90559881-90563647   | 300.02   | 4877.96  | 4.02315   | 3.68843  | 0.00125  | 0.0198792  |
| CXCL6          | 6:90645963-90648076   | 211.714  | 793.884  | 1.90681   | 2.57572  | 0.004    | 0.0464538  |
| CXCL2          | 6:90695493-90697557   | 377.507  | 2735.45  | 2.8572    | 3.8648   | 5.00E-05 | 0.00168949 |
| CXCL2          | 6:90811061-90824841   | 560.282  | 2712.03  | 2.27515   | 2.3789   | 5.00E-05 | 0.00168949 |
| AGPAT9         | 6:100069875-100141603 | 18.897   | 56.9207  | 1.59079   | 2.76953  | 5.00E-05 | 0.00168949 |
| BT.64781       | 6:103321457-103511357 | 0.22933  | 0.835201 | 1.8647    | 1.75455  | 0.0015   | 0.0228053  |
| SH3BP2         | 6:108023959-108034760 | 109.975  | 263.689  | 1.26166   | 1.6842   | 0.00215  | 0.029713   |
| IDUA           | 6:109088590-109102713 | 27.1165  | 13.5102  | -1.00512  | -2.13029 | 0.0023   | 0.0310714  |
| TACC3          | 6:109631168-109645418 | 30.1561  | 82.0535  | 1.44411   | 1.68867  | 0.0014   | 0.0216421  |
| CC2D2A         | 6:115477254-115563715 | 0.115585 | 0.856633 | 2.88972   | 2.63017  | 0.0001   | 0.00298488 |
| ALPK1          | 6:14280382-14401676   | 7.06277  | 25.6464  | 1.86045   | 2.48822  | 0.00055  | 0.0109367  |
| TET2           | 6:21176965-21317621   | 14.3965  | 33.5877  | 1.22221   | 1.82066  | 0.0012   | 0.0192837  |
| BT.60919       | 6:23557310-23679508   | 42.4578  | 188.038  | 2.14692   | 2.95522  | 5.00E-05 | 0.00168949 |
| -              | 6:24101119-24336676   | 2.36434  | 8.92027  | 1.91565   | 2.13637  | 0.00065  | 0.0121886  |
| HERC5          | 6:37681999-37728536   | 13.0088  | 36.1938  | 1.47626   | 2.23403  | 0.00045  | 0.00945137 |
| HERC6          | 6:37736092-37793279   | 16.4902  | 67.0476  | 2.02358   | 3.04716  | 5.00E-05 | 0.00168949 |
| RELL1          | 6:58565924-58660258   | 20.2605  | 49.0854  | 1.27662   | 2.28396  | 0.0004   | 0.00870551 |
| BT.53706       | 6:59823315-59866460   | 61.0463  | 192.593  | 1.65758   | 2.30175  | 0.00055  | 0.0109367  |
| TEC            | 6:68468929-68635494   | 8.01373  | 22.1735  | 1.46829   | 2.59484  | 5.00E-05 | 0.00168949 |
| CHIC2          | 6:71186362-71245780   | 9.78968  | 22.1195  | 1.17599   | 2.6986   | 0.0004   | 0.00870551 |
| RASSF6         | 6:90373216-90429759   | 0.287099 | 1.60497  | 2.48293   | 1.80701  | 0.0019   | 0.0272104  |
| BTC            | 6:91430304-91480129   | 0.392117 | 1.72745  | 2.13929   | 2.30841  | 0.00095  | 0.0163093  |
| SCARB2         | 6:92797819-92879565   | 137.13   | 63.8962  | -1.10174  | -1.91855 | 0.0043   | 0.0488299  |
| ANKRD56        | 6:93486377-93488711   | 0.817476 | 2.95306  | 1.85296   | 2.22771  | 0.0024   | 0.0320774  |
| ANTXR2         | 6:96346731-96526016   | 52.6799  | 173.083  | 1.71614   | 2.15691  | 0.002    | 0.0280894  |

|                |                       |          |         |           |          |          |            |
|----------------|-----------------------|----------|---------|-----------|----------|----------|------------|
| PRKG2          | 6:97652568-97775756   | 1.87793  | 9.2521  | 2.30064   | 2.74131  | 0.0001   | 0.00298488 |
| RASGEF1B       | 6:97967085-98026691   | 44.4392  | 158.445 | 1.83408   | 2.97112  | 5.00E-05 | 0.00168949 |
| HPSE           | 6:99846840-99892778   | 4.21835  | 15.8005 | 1.90522   | 2.91465  | 5.00E-05 | 0.00168949 |
| KLHL8          | 6:103829607-103897375 | 46.6033  | 121.706 | 1.38489   | 2.48704  | 0.00035  | 0.00778905 |
| WFS1           | 6:104673700-104704644 | 35.4928  | 18.1871 | -0.964608 | -1.69357 | 0.0033   | 0.0400404  |
| SLC2A9         | 6:109884666-110062237 | 20.9652  | 55.3594 | 1.40083   | 1.59291  | 0.0042   | 0.0479306  |
| PROM1          | 6:115980288-116111860 | 2.73652  | 5.96531 | 1.12425   | 1.7655   | 0.00405  | 0.0467594  |
| TAPT1          | 6:116194012-116241336 | 12.9272  | 29.682  | 1.19918   | 2.02631  | 0.00185  | 0.0267998  |
| HOMER3         | 7:4207322-4215509     | 18.8261  | 9.12588 | -1.0447   | -1.65719 | 0.0025   | 0.0331256  |
| BT.3469        | 7:4586620-4667865     | 33.1519  | 94.8325 | 1.51629   | 2.19446  | 0.0001   | 0.00298488 |
| ISYNA1         | 7:4669405-4672648     | 4.22758  | 21.024  | 2.31413   | 3.50465  | 5.00E-05 | 0.00168949 |
| IL12RB1        | 7:5050174-5068855     | 0.211504 | 1.02559 | 2.2777    | 1.81356  | 0.0013   | 0.0203927  |
| CPAMD8         | 7:5991420-6095676     | 2.0733   | 0.74225 | -1.48195  | -1.76225 | 0.00165  | 0.0243622  |
| ENSBTAG000000C | 7:11603167-11942226   | 4.50731  | 11.0226 | 1.29013   | 2.0272   | 0.0026   | 0.0338024  |
| EMR3           | 7:12205984-12271032   | 51.374   | 165.254 | 1.68557   | 2.54728  | 5.00E-05 | 0.00168949 |
| DNAJB1         | 7:12366855-12370535   | 70.9362  | 505.158 | 2.83214   | 3.73422  | 5.00E-05 | 0.00168949 |
| HOOK2          | 7:13862727-13874728   | 4.97599  | 11.9271 | 1.26119   | 1.79162  | 0.00115  | 0.0186976  |
| ICAM1          | 7:16018201-16050247   | 64.0956  | 228.964 | 1.83682   | 2.79201  | 5.00E-05 | 0.00168949 |
| BT.34883       | 7:16054554-16061272   | 0.18267  | 3.71818 | 4.34728   | 3.38641  | 5.00E-05 | 0.00168949 |
| PDE4A          | 7:16176855-16215655   | 14.3286  | 7.1655  | -0.999764 | -1.67008 | 0.0028   | 0.0357634  |
| RETN           | 7:17737515-17738903   | 165.828  | 483.242 | 1.54306   | 5.12144  | 5.00E-05 | 0.00168949 |
| C19ORF59       | 7:17745296-17749750   | 58.1905  | 311.794 | 2.42174   | 3.13777  | 5.00E-05 | 0.00168949 |
| BT.64160       | 7:19076009-19080237   | 18.2257  | 87.3683 | 2.26113   | 3.20684  | 5.00E-05 | 0.00168949 |
| SAFB2          | 7:19908340-19936959   | 34.7149  | 87.2759 | 1.33003   | 2.10728  | 0.0005   | 0.0101767  |
| STAP2          | 7:20966850-20978542   | 14.3009  | 34.3806 | 1.26549   | 1.6258   | 0.00345  | 0.0413521  |
| IRF1           | 7:23235248-23313486   | 56.4242  | 246.456 | 2.12695   | 2.8149   | 0.0001   | 0.00298488 |
| FNIP1          | 7:23988065-24063506   | 15.5645  | 20.6686 | 1.35228   | 0.775844 | 0.0001   | 0.00298488 |
| CEP120         | 7:31688461-31774451   | 3.66722  | 9.48425 | 1.37085   | 2.27486  | 0.00015  | 0.00417103 |
| NLRP3          | 7:42026046-42075814   | 15.4536  | 67.8732 | 2.1349    | 1.94367  | 0.0002   | 0.00512801 |
| MIDN           | 7:45307480-45337403   | 52.3019  | 121.649 | 1.21779   | 1.74029  | 0.00115  | 0.0186976  |
| UBE2B          | 7:47528580-47545655   | 138.348  | 378.453 | 1.45181   | 2.42762  | 0.00015  | 0.00417103 |
| MGC128424      | 7:64133811-64153713   | 52.109   | 146.816 | 1.4944    | 3.01067  | 5.00E-05 | 0.00168949 |
| GPX3           | 7:64286947-64295116   | 15.7579  | 51.4593 | 1.70736   | 2.87412  | 5.00E-05 | 0.00168949 |
| GM2A           | 7:64499095-64511547   | 171.062  | 88.1338 | -0.956747 | -2.78639 | 0.0034   | 0.0408591  |
| CYFIP2         | 7:70982412-71115619   | 6.37722  | 19.4502 | 1.60879   | 2.41365  | 5.00E-05 | 0.00168949 |
| FAM129C        | 7:5494989-5514016     | 27.2309  | 12.4381 | -1.13048  | -1.71436 | 0.00215  | 0.029713   |
| SLC27A1        | 7:5529912-5571775     | 49.1028  | 23.7197 | -1.04972  | -1.75415 | 0.00395  | 0.045989   |
| -              | 7:6615879-6616787     | 270.056  | 666.6   | 1.30356   | 33.4416  | 0.0026   | 0.0338024  |
| HSH2D          | 7:7873254-7894542     | 19.1472  | 65.7581 | 1.78003   | 2.61515  | 5.00E-05 | 0.00168949 |
| NFIX           | 7:13592199-13685027   | 5.06189  | 16.2839 | 1.6857    | 2.22894  | 0.00025  | 0.0060614  |
| JUNB           | 7:13851130-13852933   | 246.255  | 773.292 | 1.65086   | 1.74101  | 0.001    | 0.0169155  |

|                |                       |          |          |           |          |          |            |
|----------------|-----------------------|----------|----------|-----------|----------|----------|------------|
| MUC16          | 7:14314679-14384939   | 1.07003  | 4.28096  | 2.00028   | 2.47381  | 5.00E-05 | 0.00168949 |
| ICAM3          | 7:16087158-16094419   | 72.917   | 220.62   | 1.59723   | 2.42975  | 0.0002   | 0.00512801 |
| AP1M2          | 7:16302065-16312824   | 9.45615  | 25.4637  | 1.42912   | 2.26956  | 0.0002   | 0.00512801 |
| CD320          | 7:18183236-18187953   | 9.7782   | 24.0392  | 1.29775   | 2.7821   | 0.0007   | 0.0128987  |
| EMR1,EMR4P     | 7:18709362-18834730   | 65.4482  | 332.892  | 2.34663   | 2.88726  | 5.00E-05 | 0.00168949 |
| VAV1           | 7:18866560-18937070   | 39.975   | 83.452   | 1.06185   | 1.78699  | 0.00315  | 0.0387649  |
| TRIP10         | 7:18967188-18970399   | 8.89999  | 19.5531  | 1.13552   | 2.44444  | 0.00415  | 0.047675   |
| TNFSF9         | 7:19187446-19190363   | 18.064   | 57.623   | 1.67353   | 3.48288  | 0.0001   | 0.00298488 |
| VMAC           | 7:19694192-19697346   | 12.4685  | 5.98343  | -1.05925  | -1.74304 | 0.00435  | 0.0491152  |
| CREB3L3        | 7:21088134-21099619   | 10.5991  | 3.4163   | -1.63344  | -2.01769 | 0.0001   | 0.00298488 |
| FZR1           | 7:21613838-21631261   | 19.6626  | 40.7975  | 1.05303   | 1.71825  | 0.0028   | 0.0357634  |
| S1PR4          | 7:21889525-21890683   | 9.32485  | 33.001   | 1.82336   | 3.78902  | 5.00E-05 | 0.00168949 |
| GADD45B        | 7:22411967-22414079   | 42.805   | 275.167  | 2.68445   | 4.80359  | 5.00E-05 | 0.00168949 |
| PDLIM4         | 7:23443527-23457942   | 119.639  | 59.8568  | -0.999095 | -1.64861 | 0.0033   | 0.0400404  |
| SLC27A6        | 7:26237928-26329594   | 4.09415  | 18.2944  | 2.15977   | 2.99538  | 5.00E-05 | 0.00168949 |
| CLK4           | 7:41100795-41122592   | 11.1355  | 31.6037  | 1.50493   | 2.73787  | 5.00E-05 | 0.00168949 |
| R3HDM4         | 7:45053756-45063670   | 26.3213  | 66.1827  | 1.33022   | 2.08244  | 0.0003   | 0.00696807 |
| SBNO2          | 7:45208809-45251042   | 39.0097  | 156.351  | 2.00288   | 2.57161  | 5.00E-05 | 0.00168949 |
| AFF4           | 7:46082729-46161911   | 20.295   | 51.327   | 1.3386    | 2.00448  | 0.00045  | 0.00945137 |
| -              | 7:62844074-62853642   | 6.18565  | 61.1909  | 3.30632   | 29.1344  | 0.0032   | 0.0392405  |
| BT.89338       | 7:64054327-64065549   | 29.9625  | 63.769   | 1.0897    | 1.76746  | 0.0019   | 0.0272104  |
| TNIP1          | 7:64295656-64339418   | 121.273  | 436.011  | 1.84611   | 2.18867  | 0.00015  | 0.00417103 |
| NMUR2          | 7:65631968-65649628   | 1.28805  | 10.9358  | 3.08579   | 2.68428  | 5.00E-05 | 0.00168949 |
| BT.44707       | 7:71158811-71250704   | 15.6359  | 47.4039  | 1.60014   | 2.09354  | 0.00045  | 0.00945137 |
| IL12B          | 7:73002515-73021185   | 1.87443  | 23.0994  | 3.62334   | 3.59821  | 5.00E-05 | 0.00168949 |
| ATP10B         | 7:74334044-74472502   | 0.136574 | 0.821254 | 2.58815   | 2.58228  | 0.0006   | 0.0116461  |
| HAPLN1         | 7:85845447-85924686   | 0.145062 | 0.922602 | 2.66904   | 1.90276  | 0.003    | 0.0373514  |
| BT.56524       | 7:92440984-92451738   | 12.4655  | 29.9532  | 1.26477   | 2.13346  | 0.00035  | 0.00778905 |
| ELL2           | 7:97620030-97694024   | 56.8899  | 165.77   | 1.54294   | 2.47731  | 5.00E-05 | 0.00168949 |
| CHD1           | 7:100492793-100566372 | 13.0515  | 32.6208  | 1.32158   | 2.07519  | 0.00075  | 0.0136024  |
| BT.17789       | 7:102456174-102555855 | 23.179   | 47.9145  | 1.04765   | 2.28185  | 0.0022   | 0.0300732  |
| -              | 8:16727673-16727979   | 0        | 257.643  | inf       | nan      | 0.0003   | 0.00696807 |
| BT.45949       | 8:23339674-23369117   | 19.8005  | 8.34343  | -1.24683  | -2.72956 | 0.00055  | 0.0109367  |
| BT.91925       | 8:29860275-30155742   | 13.6414  | 43.5198  | 1.67368   | 1.96618  | 0.0002   | 0.00512801 |
| ENSBTAG0000004 | 8:39364223-39483004   | 403.807  | 2525.7   | 2.64494   | 91.5451  | 5.00E-05 | 0.00168949 |
| BT.29711       | 8:45568974-45696886   | 4.04498  | 12.5481  | 1.63326   | 2.43483  | 5.00E-05 | 0.00168949 |
| FAM189A2       | 8:45739649-45816965   | 0.919911 | 3.43296  | 1.89989   | 1.96379  | 0.00125  | 0.0198792  |
| UNC13B         | 8:59797488-60010848   | 3.44469  | 12.8258  | 1.8966    | 3.10422  | 5.00E-05 | 0.00168949 |
| TDRD7          | 8:63071038-63173712   | 14.978   | 30.9042  | 1.04496   | 1.74651  | 0.0034   | 0.0408591  |
| NR4A3          | 8:65334777-65373695   | 46.4159  | 128.382  | 1.46776   | 2.07316  | 0.0002   | 0.00512801 |
| SLC39A14       | 8:70186538-70237645   | 2.92592  | 7.40614  | 1.33983   | 2.32806  | 5.00E-05 | 0.00168949 |

|                |                       |          |         |          |          |          |            |
|----------------|-----------------------|----------|---------|----------|----------|----------|------------|
| PPP3CC,SORBS3  | 8:70262315-70384759   | 40.7046  | 19.0582 | -1.09478 | -1.8133  | 0.0009   | 0.015665   |
| ENSBTAG0000003 | 8:70799931-70896918   | 39.4235  | 16.5573 | -1.25159 | -2.20631 | 0.0008   | 0.0143027  |
| SLC25A37       | 8:71477134-71588259   | 23.0108  | 54.6412 | 1.24768  | 1.75769  | 0.00115  | 0.0186976  |
| ADAM28,ADAMD   | 8:72394890-72522938   | 19.8213  | 6.22575 | -1.67073 | -2.86787 | 5.00E-05 | 0.00168949 |
| PTK2B          | 8:75713096-75850738   | 67.9267  | 181.533 | 1.41818  | 1.8607   | 0.0012   | 0.0192837  |
| UBAP1          | 8:76920746-76988252   | 44.1538  | 145.018 | 1.71562  | 2.71545  | 5.00E-05 | 0.00168949 |
| FGD3           | 8:85810471-85852096   | 25.2887  | 56.9018 | 1.16998  | 1.67335  | 0.00255  | 0.0334038  |
| WNK2           | 8:85984691-86130645   | 1.19982  | 2.94483 | 1.29536  | 1.50442  | 0.00405  | 0.0467594  |
| NFIL3          | 8:87876586-87893182   | 81.8851  | 429.694 | 2.39164  | 3.30733  | 5.00E-05 | 0.00168949 |
| SEMA4D         | 8:90136711-90262973   | 74.2767  | 175.767 | 1.24268  | 1.96894  | 0.00345  | 0.0413521  |
| BT.75887       | 8:101280065-101406330 | 1.65084  | 3.8576  | 1.22451  | 1.72097  | 0.00335  | 0.0404341  |
| BSPRY          | 8:104306682-104329562 | 6.66916  | 15.7011 | 1.23529  | 1.70952  | 0.00405  | 0.0467594  |
| ZNF618         | 8:104797237-104995986 | 6.44479  | 2.44347 | -1.3992  | -2.08043 | 0.0002   | 0.00512801 |
| PAPPA          | 8:107114698-107380389 | 5.70408  | 2.4673  | -1.20906 | -1.86519 | 0.001    | 0.0169155  |
| TLR4           | 8:108828898-108839910 | 107.894  | 325.639 | 1.59365  | 1.92713  | 0.0033   | 0.0400404  |
| BLK            | 8:7658876-7710709     | 0.242379 | 1.70988 | 2.81856  | 2.61767  | 0.00235  | 0.03147    |
| PD-L1          | 8:39494264-39514666   | 47.3818  | 308.978 | 2.7051   | 3.12324  | 5.00E-05 | 0.00168949 |
| BT.25287       | 8:39632637-39750403   | 10.7547  | 35.4372 | 1.72029  | 3.01042  | 5.00E-05 | 0.00168949 |
| BT.65534       | 8:62021938-62064549   | 1.23483  | 3.01842 | 1.28948  | 1.76446  | 0.00215  | 0.029713   |
| DOK2           | 8:69724703-69729317   | 46.1188  | 21.1059 | -1.12771 | -2.35695 | 0.00065  | 0.0121886  |
| B4GALT1        | 8:76176881-76232330   | 73.1996  | 163.249 | 1.15717  | 1.81724  | 0.00335  | 0.0404341  |
| AQP3           | 8:76525368-76531334   | 3.41517  | 9.96926 | 1.54553  | 2.68147  | 0.0003   | 0.00696807 |
| RASEF          | 8:77514030-77609180   | 2.03146  | 6.38611 | 1.65242  | 2.33381  | 0.0002   | 0.00512801 |
| SLC28A3        | 8:78871654-78944400   | 13.4293  | 44.3559 | 1.72374  | 2.78743  | 5.00E-05 | 0.00168949 |
| ZCCHC6         | 8:80842964-80900965   | 21.524   | 73.2781 | 1.76743  | 2.4737   | 5.00E-05 | 0.00168949 |
| FBP1           | 8:82460863-82491694   | 16.1514  | 41.1439 | 1.34902  | 2.98778  | 0.0004   | 0.00870551 |
| NINJ1          | 8:85936414-85947675   | 130.784  | 337.719 | 1.36864  | 2.91556  | 0.00035  | 0.00778905 |
| GADD45G        | 8:90017452-90018996   | 26.6996  | 69.6993 | 1.38432  | 3.24007  | 0.00025  | 0.0060614  |
| EPB41L4B       | 8:100408791-100544780 | 1.13542  | 3.13721 | 1.46625  | 1.63165  | 0.0042   | 0.0479306  |
| BT.69126       | 8:102666739-102697281 | 8.86741  | 21.7933 | 1.2973   | 2.65749  | 0.00225  | 0.0305452  |
| TNFSF15        | 8:105725136-105745282 | 37.1767  | 123.939 | 1.73716  | 3.6848   | 5.00E-05 | 0.00168949 |
| TRAF1          | 8:112194563-112218429 | 55.4155  | 155.243 | 1.48617  | 2.32345  | 5.00E-05 | 0.00168949 |
| TSPYL4         | 9:34889675-34893768   | 3.35445  | 8.14971 | 1.28067  | 2.40265  | 0.00035  | 0.00778905 |
| -              | 9:37598466-37618257   | 0        | 8.95067 | inf      | nan      | 0.0008   | 0.0143027  |
| FYN            | 9:39048138-39259883   | 13.6336  | 32.8876 | 1.27037  | 2.11229  | 0.0002   | 0.00512801 |
| BT.79862       | 9:60828153-61222077   | 1.53827  | 6.16    | 2.00162  | 1.70948  | 0.0019   | 0.0272104  |
| ENPP3          | 9:70588606-70673279   | 0.683542 | 2.24307 | 1.71437  | 2.24056  | 0.00265  | 0.0342912  |
| TNFAIP3        | 9:76763099-76777138   | 45.9215  | 163.659 | 1.83346  | 2.52907  | 5.00E-05 | 0.00168949 |
| KIAA1244       | 9:76991896-77158234   | 0.36467  | 2.70434 | 2.89061  | 1.45963  | 0.00285  | 0.0362346  |
| STX11          | 9:82583794-82639192   | 28.3831  | 155.854 | 2.45709  | 3.39736  | 5.00E-05 | 0.00168949 |
| SOD2           | 9:97399001-97404522   | 3378.43  | 11250.5 | 1.73556  | 1.89543  | 0.0006   | 0.0116461  |

|                |                        |          |         |           |          |          |            |
|----------------|------------------------|----------|---------|-----------|----------|----------|------------|
| WTAP           | 9:97434015-97460620    | 54.8537  | 267.197 | 2.28425   | 5.13314  | 5.00E-05 | 0.00168949 |
| SLC22A1        | 9:97750745-97787561    | 5.41774  | 34.7155 | 2.67982   | 3.31596  | 5.00E-05 | 0.00168949 |
| -              | 9:102448418-102453631  | 0        | 2.36532 | inf       | nan      | 0.0006   | 0.0116461  |
| -              | 9:102455394-102460091  | 0        | 660.946 | inf       | nan      | 5.00E-05 | 0.00168949 |
| TPD52L1        | 9:26310579-26403759    | 6.78759  | 21.1449 | 1.63934   | 2.13148  | 0.00045  | 0.00945137 |
| BT.97078       | 9:28811577-28828968    | 7.98216  | 17.6647 | 1.14602   | 2.08618  | 0.0007   | 0.0128987  |
| BT.95322       | 9:37022763-37026932    | 171.744  | 400.027 | 1.21983   | 1.81802  | 0.0041   | 0.0471398  |
| PRDM1          | 9:44352088-44377566    | 20.6931  | 89.1698 | 2.1074    | 2.95461  | 5.00E-05 | 0.00168949 |
| ANKRD6         | 9:61441229-61624884    | 0.293439 | 1.16298 | 1.98669   | 1.87731  | 0.0015   | 0.0228053  |
| PM20D2         | 9:61848878-61869032    | 1.19387  | 7.61167 | 2.67256   | 2.46886  | 0.0001   | 0.00298488 |
| BT.70581       | 9:61921604-61925635    | 76.9666  | 388.744 | 2.33652   | 3.83951  | 5.00E-05 | 0.00168949 |
| ZNF292         | 9:63520826-63622784    | 8.12453  | 26.5563 | 1.7087    | 2.63239  | 0.0001   | 0.00298488 |
| PTPRK          | 9:66968685-67594209    | 0.760131 | 1.87163 | 1.29998   | 1.8358   | 0.0038   | 0.0446185  |
| MGC151537      | 9:75364391-75543894    | 1.88136  | 6.33721 | 1.75208   | 2.05565  | 0.00045  | 0.00945137 |
| BT.49564       | 9:76092203-76116593    | 119.295  | 267.203 | 1.1634    | 2.08983  | 0.0042   | 0.0479306  |
| BT.103496      | 9:93099102-93307575    | 7.53971  | 25.7244 | 1.77056   | 1.87481  | 0.00085  | 0.0150217  |
| TAGAP          | 9:96806293-96815764    | 39.6337  | 204.498 | 2.36729   | 3.36404  | 5.00E-05 | 0.00168949 |
| AGPAT4         | 9:98239671-98376380    | 0.800842 | 4.20626 | 2.39295   | 2.48536  | 5.00E-05 | 0.00168949 |
| RPS6KA2        | 9:102918981-103200280  | 20.5818  | 10.3744 | -0.988343 | -1.7163  | 0.002    | 0.0280894  |
| THBS2          | 9:104732695-104763858  | 4.91647  | 1.56869 | -1.64807  | -2.08177 | 0.00035  | 0.00778905 |
| -              | GJ059320.1:4276-4966   | 64.6763  | 11670.2 | 7.49538   | 296.396  | 5.00E-05 | 0.00168949 |
| -              | GJ059320.1:5104-5377   | 157.157  | 21578   | 7.10121   | 584.674  | 5.00E-05 | 0.00168949 |
| -              | GJ059572.1:82-385      | 0        | 1595.6  | inf       | nan      | 0.0001   | 0.00298488 |
| -              | GJ060129.1:7619-18461  | 12.5825  | 59.2377 | 2.2351    | 2.5084   | 0.00015  | 0.00417103 |
| -              | GJ060129.1:20583-22041 | 29.9434  | 338.259 | 3.49782   | 93.3676  | 0.0015   | 0.0228053  |
| -              | X:2992756-3024498      | 4410.3   | 13078.9 | 1.56829   | 308.603  | 0.00025  | 0.0060614  |
| LONRF3         | X:3237204-3313561      | 13.0398  | 42.5803 | 1.70727   | 2.58414  | 5.00E-05 | 0.00168949 |
| ENSBTAG0000004 | X:3313815-3316842      | 0.827317 | 12.4638 | 3.91316   | 3.37862  | 5.00E-05 | 0.00168949 |
| XIAP           | X:7810796-7845821      | 498.38   | 1979.07 | 1.98951   | 109.057  | 5.00E-05 | 0.00168949 |
| BT.88804       | X:13645602-13671526    | 5.25528  | 1.67442 | -1.6501   | -2.06168 | 0.0003   | 0.00696807 |
| GAB3           | X:39064066-39147727    | 3.41779  | 7.41307 | 1.11701   | 1.61475  | 0.00395  | 0.045989   |
| TSC22D3        | X:59707291-59772737    | 1070.02  | 2721.57 | 1.3468    | 1.71153  | 0.00405  | 0.0467594  |
| BRWD3          | X:70898077-71091449    | 4.05964  | 7.9518  | 0.96993   | 1.67827  | 0.0036   | 0.0428158  |
| TIMP1          | X:91231129-91236073    | 206.043  | 511.452 | 1.31165   | 1.63571  | 0.0029   | 0.0365009  |
| VSIG4          | X:99894565-99933646    | 203.547  | 78.0639 | -1.38263  | -2.30971 | 0.0003   | 0.00696807 |
| MID1           | X:139715682-139928580  | 3.84503  | 9.68022 | 1.33205   | 1.953    | 0.00135  | 0.0210576  |
| FRMPD3         | X:59847354-59915953    | 0.286599 | 1.22082 | 2.09074   | 1.76207  | 0.001    | 0.0169155  |
| ACSL4          | X:62476951-62551846    | 41.4375  | 107.178 | 1.371     | 2.34217  | 0.0003   | 0.00696807 |
| BT.29713       | X:65246770-65449919    | 0.333347 | 1.60261 | 2.26532   | 2.08601  | 0.0029   | 0.0365009  |
| NLGN3          | X:84765208-84787720    | 1.22206  | 4.59165 | 1.90969   | 2.50163  | 5.00E-05 | 0.00168949 |
| DLG3           | X:85245061-85298606    | 1.37645  | 4.49079 | 1.70602   | 2.34974  | 0.00025  | 0.0060614  |

|       |                       |         |          |          |          |         |            |
|-------|-----------------------|---------|----------|----------|----------|---------|------------|
| EDA   | X:85706781-86099973   | 2.07352 | 0.590822 | -1.81128 | -2.08965 | 0.00365 | 0.0433359  |
| EFNB1 | X:86944027-86956186   | 14.4063 | 6.89518  | -1.06304 | -2.07444 | 0.00155 | 0.0233854  |
| WDR45 | X:92234970-92240200   | 14.5909 | 32.8695  | 1.17168  | 2.01359  | 0.0006  | 0.0116461  |
| -     | X:103684730-103721010 | 0       | 7.78901  | inf      | nan      | 0.00295 | 0.0369284  |
| DDX3X | X:107678776-107692052 | 119.365 | 417.751  | 1.80726  | 2.5619   | 0.00045 | 0.00945137 |
| SYAP1 | X:134023362-134039236 | 31.8379 | 72.5237  | 1.18771  | 2.51421  | 0.0002  | 0.00512801 |

---
