# Supplementary material for: Differential expression of genes in milk of dairy cattle during lactation
Source: PubMed Central journal article supplement — Anim Genet. 2015 Dec 22;47(2):174–80. doi: 10.1111/age.12394 (PMC5064620; doi:10.1111/age.12394), 2015-12-22
Supplement: AGE-47-174-s005.pdf [file AGE-47-174-s005.pdf]

Table S5 Details of differentially expressed genes between H10 and H70

| Gene     | Location              | Value_1(H10) | Value_2(H70) | log2(fold_change) | test_stat | p_value  | q_value    |
|----------|-----------------------|--------------|--------------|-------------------|-----------|----------|------------|
| -        | 1:1413290-1461609     | 16.9753      | 0            | -inf              | nan       | 5.00E-05 | 0.00353958 |
| CLDN8    | 1:5035869-5037857     | 4.54445      | 25.6552      | 2.49707           | 3.31332   | 5.00E-05 | 0.00353958 |
| BT.68839 | 1:46543384-46554479   | 49.4037      | 10.8703      | -2.18423          | -3.07183  | 5.00E-05 | 0.00353958 |
| ATP13A4  | 1:74487193-74630220   | 2.19528      | 26.9015      | 3.61521           | 3.45559   | 5.00E-05 | 0.00353958 |
| BCL6     | 1:80179481-80202388   | 84.2164      | 32.8995      | -1.35604          | -1.90853  | 0.0008   | 0.0302886  |
| MASP1    | 1:80596923-80649363   | 0.969394     | 5.66817      | 2.54773           | 2.08426   | 0.00045  | 0.0191737  |
| TM4SF18  | 1:119800090-119823457 | 7.10352      | 31.2232      | 2.13601           | 2.56315   | 5.00E-05 | 0.00353958 |
| MX2      | 1:143119271-143155057 | 142.638      | 43.4942      | -1.71347          | -2.44438  | 0.00015  | 0.00832163 |
| BT.11942 | 1:146946220-147040968 | 0.231036     | 2.3278       | 3.33277           | 2.32578   | 0.00015  | 0.00832163 |
| ETS2     | 1:152878891-152890252 | 59.4162      | 11.7654      | -2.3363           | -2.91604  | 5.00E-05 | 0.00353958 |
| BDH1     | 1:72572940-72608859   | 6.18044      | 26.6531      | 2.10852           | 2.34575   | 0.0003   | 0.0142573  |
| BT.28708 | 1:77197969-77343645   | 88.8532      | 19.7916      | -2.16654          | -3.02005  | 5.00E-05 | 0.00353958 |
| EPHB3    | 1:83202438-83244544   | 0.837172     | 4.59454      | 2.45633           | 2.25526   | 0.00035  | 0.0160175  |
| BT.85209 | 1:110945723-111211551 | 70.7888      | 1.31208      | -5.7536           | -3.04325  | 5.00E-05 | 0.00353958 |
| RASA2    | 1:128345231-128468291 | 9.53045      | 3.12666      | -1.60792          | -2.0316   | 0.0011   | 0.0377556  |
| -        | 1:146880467-146883339 | 1.72196      | 0            | -inf              | nan       | 0.0013   | 0.0430966  |
| -        | 1:153129915-153167211 | 50.5875      | 5.48158      | -3.20612          | -3.24485  | 0.0001   | 0.00612252 |
| BT.69975 | 10:7879495-7897150    | 1.44073      | 14.8231      | 3.36298           | 3.43833   | 5.00E-05 | 0.00353958 |
| BT.28745 | 10:7956083-7964929    | 3.26542      | 23.749       | 2.86252           | 3.00836   | 0.0001   | 0.00612252 |
| -        | 10:10067047-10069294  | 0            | 286.457      | inf               | nan       | 5.00E-05 | 0.00353958 |
| NEO1     | 10:19795805-19959384  | 0.473108     | 2.08662      | 2.14092           | 1.66432   | 0.00155  | 0.0491086  |
| SPINT1   | 10:36468113-36504314  | 2.45933      | 11.3463      | 2.20589           | 1.97349   | 0.0005   | 0.0209753  |
| DMXL2    | 10:58841641-59070013  | 30.8973      | 5.25003      | -2.55708          | -2.90496  | 0.0004   | 0.0176519  |
| HRH2     | 10:5380605-5410760    | 33.9223      | 5.11125      | -2.73049          | -3.02998  | 5.00E-05 | 0.00353958 |
| DMGDH    | 10:9994009-10066954   | 0.10604      | 4.31497      | 5.34667           | 4.58534   | 0.0003   | 0.0142573  |
| HOMER1   | 10:10350691-10484916  | 1.07888      | 5.20513      | 2.27041           | 2.58359   | 5.00E-05 | 0.00353958 |
| TLN2     | 10:47303875-47796327  | 0.779115     | 3.34587      | 2.10247           | 2.00024   | 0.0006   | 0.0240566  |
| SEMA6D   | 10:62863668-62921509  | 0.189476     | 1.52023      | 3.00421           | 2.07674   | 0.0003   | 0.0142573  |
| DHRS7    | 10:72617791-72641194  | 6.29002      | 22.1439      | 1.81578           | 2.98303   | 0.00045  | 0.0191737  |
| RAB15    | 10:77387905-77408370  | 2.91288      | 9.98546      | 1.77738           | 1.93288   | 0.0001   | 0.00612252 |
| ABCD4    | 10:86023729-86039767  | 7.06901      | 25.8963      | 1.87317           | 2.3512    | 0.00025  | 0.0124469  |
| PROM2    | 11:1991028-2007006    | 0.0873771    | 1.62886      | 4.22046           | 2.41792   | 0.0014   | 0.0455234  |
| IL1R2    | 11:6717052-6757777    | 19.5039      | 1.10071      | -4.14726          | -3.63319  | 5.00E-05 | 0.00353958 |
| RETSAT   | 11:49475070-49489800  | 5.70722      | 30.3149      | 2.40917           | 3.24845   | 5.00E-05 | 0.00353958 |
| SLC1A4   | 11:63290421-63395507  | 3.82796      | 11.9295      | 1.63988           | 2.11578   | 0.00075  | 0.0287966  |
| MXD1     | 11:68232836-68255717  | 419.972      | 44.7088      | -3.23166          | -2.0257   | 0.00015  | 0.00832163 |
| CMPK2    | 11:90041890-90057598  | 22.9891      | 4.88099      | -2.2357           | -2.45085  | 0.0002   | 0.0105774  |

|                  |                        |          |          |          |          |          |            |
|------------------|------------------------|----------|----------|----------|----------|----------|------------|
| BT.100456        | 11:92577650-92665089   | 0.827519 | 5.11552  | 2.62801  | 2.35676  | 0.00015  | 0.00832163 |
| BT.88795         | 11:107260652-107261718 | 1029.39  | 148.494  | -2.79332 | -7.19726 | 5.00E-05 | 0.00353958 |
| BT.44392         | 11:2250454-2252492     | 252.897  | 50.2738  | -2.33067 | -4.18332 | 5.00E-05 | 0.00353958 |
| DYSF             | 11:12894978-13123270   | 8.70919  | 2.67039  | -1.70549 | -2.30516 | 0.0001   | 0.00612252 |
| IL1A             | 11:46348925-46360429   | 24.9222  | 5.76163  | -2.11288 | -2.69322 | 5.00E-05 | 0.00353958 |
| IL1B             | 11:46410276-46418787   | 105.687  | 16.904   | -2.64436 | -3.8257  | 5.00E-05 | 0.00353958 |
| CTNNA2,ENSBTA    | 11:54723189-55906462   | 0.198223 | 2.12806  | 3.42434  | 1.94791  | 0.00105  | 0.0364071  |
| -                | 11:68326084-68383016   | 58.1435  | 8.67738  | -2.74429 | -4.90472 | 0.00015  | 0.00832163 |
| FOSL2            | 11:71329771-71349193   | 134.244  | 53.0472  | -1.33951 | -2.23022 | 0.0009   | 0.0327957  |
| BT.49091         | 11:72223039-72224689   | 12.8802  | 52.3529  | 2.02312  | 3.60219  | 0.00035  | 0.0160175  |
| LPIN1            | 11:86035328-86128538   | 7.68836  | 28.1014  | 1.86989  | 1.83936  | 0.001    | 0.0352124  |
| RSAD2            | 11:90012629-90029927   | 71.1195  | 6.72072  | -3.40356 | -4.77989 | 5.00E-05 | 0.00353958 |
| SH2D3C           | 11:98435179-98467957   | 26.9662  | 6.03295  | -2.16022 | -1.68388 | 0.00105  | 0.0364071  |
| NOTCH1           | 11:103986051-104030727 | 45.4329  | 16.4454  | -1.46605 | -2.05981 | 0.00105  | 0.0364071  |
| BT.25025         | 11:104417538-104424788 | 17.2843  | 5.62554  | -1.6194  | -2.06271 | 0.00085  | 0.0313946  |
| VAV2             | 11:104646645-104796229 | 1.30443  | 14.2907  | 3.45358  | 3.08575  | 5.00E-05 | 0.00353958 |
| IFITM2           | 11:107191849-107203683 | 1266.53  | 173.101  | -2.8712  | -7.44282 | 5.00E-05 | 0.00353958 |
| AKAP11           | 12:12447546-12495973   | 9.06162  | 26.1591  | 1.52947  | 2.03843  | 0.001    | 0.0352124  |
| KIAA0226L        | 12:16418105-16458705   | 98.5607  | 15.8224  | -2.63904 | -3.08801 | 5.00E-05 | 0.00353958 |
| ALOX5AP          | 12:30135227-30159808   | 116.668  | 29.3236  | -1.99227 | -2.30958 | 0.0002   | 0.0105774  |
| SOX21            | 12:69742531-69743248   | 0        | 0.854087 | inf      | nan      | 0.0008   | 0.0302886  |
| SPTLC3           | 13:6743745-6941563     | 2.61794  | 14.8543  | 2.50438  | 2.5085   | 0.0001   | 0.00612252 |
| IL2RA            | 13:17540960-17586321   | 12.3624  | 0.325639 | -5.24654 | -4.15071 | 5.00E-05 | 0.00353958 |
| SIGLEC1          | 13:51939066-51962376   | 1.49636  | 0.201031 | -2.89596 | -2.5759  | 0.00015  | 0.00832163 |
| CREM             | 13:18496783-18563503   | 970.101  | 238.958  | -2.02138 | -1.76038 | 0.0007   | 0.0271066  |
| THBD             | 13:42217370-42221004   | 43.5754  | 8.07032  | -2.43282 | -3.49444 | 5.00E-05 | 0.00353958 |
| TGM3             | 13:53261634-53304213   | 741.398  | 43.234   | -4.10001 | -3.7377  | 5.00E-05 | 0.00353958 |
| SLCO4A1          | 13:55149363-55172499   | 28.7968  | 9.50793  | -1.59871 | -2.25928 | 0.0001   | 0.00612252 |
| BT.24663,ENSBTA  | 13:61924321-61938236   | 10.0196  | 1.97209  | -2.34503 | -2.01469 | 0.00045  | 0.0191737  |
| SULF2            | 13:76879807-77005009   | 5.11255  | 31.0158  | 2.60089  | 2.36522  | 5.00E-05 | 0.00353958 |
| SLC45A4          | 14:3711836-3740304     | 16.7507  | 4.31384  | -1.95718 | -2.67401 | 5.00E-05 | 0.00353958 |
| SLA              | 14:9261889-9508938     | 47.6255  | 15.3727  | -1.63137 | -2.64124 | 0.0003   | 0.0142573  |
| NIPAL2           | 14:68251837-68342901   | 10.6263  | 39.8094  | 1.90547  | 2.15396  | 0.00085  | 0.0313946  |
| TRIB1            | 14:16353387-16361545   | 73.6917  | 19.2746  | -1.9348  | -2.85102 | 5.00E-05 | 0.00353958 |
| H3F3C,PRKDC      | 14:21033276-21164037   | 5.78132  | 10.0856  | 3.25886  | 0.818552 | 5.00E-05 | 0.00353958 |
| CA8              | 14:27637560-27719848   | 4.00245  | 15.4279  | 1.94658  | 1.76061  | 0.0012   | 0.0405731  |
| SDC2             | 14:69930852-70050653   | 18.823   | 118.375  | 2.6528   | 3.37853  | 5.00E-05 | 0.00353958 |
| BT.44982,BT.9104 | 15:52255759-52271899   | 8.45669  | 0.86726  | -3.28556 | -3.65156 | 5.00E-05 | 0.00353958 |
| FOLR1            | 15:52563047-52567329   | 46.4197  | 188.117  | 2.01882  | 2.05243  | 0.00095  | 0.0338908  |
| DGAT2,UVRAG      | 15:55940756-56317353   | 33.2856  | 9.3032   | -1.8391  | -2.46659 | 5.00E-05 | 0.00353958 |
| -                | 15:78923225-79039276   | 253.343  | 67.1113  | -1.91647 | -9.07284 | 5.00E-05 | 0.00353958 |

|                |                      |          |          |          |          |          |            |
|----------------|----------------------|----------|----------|----------|----------|----------|------------|
| AMICA1         | 15:29313735-29345149 | 39.1811  | 11.5338  | -1.76429 | -2.45606 | 5.00E-05 | 0.00353958 |
| NUCB2          | 15:35693277-35734612 | 15.2972  | 51.8959  | 1.76235  | 2.19543  | 0.00035  | 0.0160175  |
| MUC15          | 15:57913543-58130615 | 14.1152  | 134.461  | 3.25186  | 2.46703  | 0.00025  | 0.0124469  |
| LGR4           | 15:58873842-58977292 | 0.399123 | 3.56083  | 3.15731  | 3.13927  | 0.0001   | 0.00612252 |
| CD59           | 15:65145072-65181820 | 61.2181  | 270.595  | 2.1441   | 2.22439  | 5.00E-05 | 0.00353958 |
| UBE2L6         | 15:82124875-82138170 | 41.4518  | 13.7759  | -1.58929 | -3.0433  | 0.0006   | 0.0240566  |
| TCN1           | 15:84361363-84434956 | 94.1467  | 2.02983  | -5.53548 | -4.95987 | 5.00E-05 | 0.00353958 |
| MFSD4          | 16:3168634-3193846   | 7.14208  | 64.8129  | 3.18187  | 3.25689  | 5.00E-05 | 0.00353958 |
| TGFB2          | 16:22495735-22588280 | 1.27034  | 8.62785  | 2.76379  | 2.59769  | 5.00E-05 | 0.00353958 |
| EPHX1          | 16:29585791-29624037 | 4.78103  | 19.6538  | 2.03942  | 2.14     | 0.00025  | 0.0124469  |
| ADCK3          | 16:30655458-30703396 | 11.9144  | 33.3532  | 1.48512  | 1.91196  | 0.0013   | 0.0430966  |
| IER5           | 16:63689679-63690654 | 151.298  | 47.1421  | -1.68231 | -1.83718 | 0.00085  | 0.0313946  |
| LGR6           | 16:70932237-71016271 | 1.79432  | 0.148997 | -3.59008 | -2.35463 | 0.00025  | 0.0124469  |
| BT.42411       | 16:72740020-72753761 | 57.5264  | 7.99924  | -2.84629 | -3.01797 | 5.00E-05 | 0.00353958 |
| SLC41A1        | 16:3367786-3384777   | 15.1661  | 44.8695  | 1.56488  | 2.65089  | 0.00035  | 0.0160175  |
| IL10           | 16:4402473-4406421   | 42.0477  | 11.4774  | -1.87323 | -1.7583  | 0.00125  | 0.0418473  |
| BT.91089       | 16:5099067-5125304   | 95.5381  | 29.1333  | -1.71341 | -2.28755 | 5.00E-05 | 0.00353958 |
| HHIPL2         | 16:26713224-26741364 | 9.04914  | 59.979   | 2.7286   | 2.95864  | 5.00E-05 | 0.00353958 |
| BT.23666       | 16:37966822-38045988 | 10.2031  | 3.47807  | -1.55264 | -2.164   | 0.0001   | 0.00612252 |
| SELL           | 16:38148941-38173226 | 114.501  | 10.8181  | -3.40383 | -4.01445 | 5.00E-05 | 0.00353958 |
| AGRN,ISG15     | 16:52674206-52720757 | 1758.58  | 252.95   | -2.79749 | -3.04045 | 0.0001   | 0.00612252 |
| BT.104982      | 16:69263775-69271738 | 41.3781  | 3.29773  | -3.64932 | -3.84376 | 5.00E-05 | 0.00353958 |
| FAM71A         | 16:72811910-72814133 | 2.95445  | 0.300601 | -3.29697 | -3.12797 | 0.0002   | 0.0105774  |
| FGG            | 17:2823020-2830960   | 3.43526  | 32.4012  | 3.23756  | 3.24275  | 5.00E-05 | 0.00353958 |
| -              | 17:4950509-5036228   | 88.6745  | 9.99615  | -3.14907 | -2.10402 | 5.00E-05 | 0.00353958 |
| ENSBTAG0000004 | 17:55053666-55054749 | 179.852  | 16.736   | -3.42578 | -6.20614 | 5.00E-05 | 0.00353958 |
| TBX3           | 17:62352244-62363636 | 0.481882 | 3.18949  | 2.72657  | 2.10288  | 0.00065  | 0.0256826  |
| BT.48450       | 17:72142467-72196937 | 53.4955  | 15.1203  | -1.82293 | -2.34194 | 5.00E-05 | 0.00353958 |
| SGLT1          | 17:72690557-72740066 | 1.01651  | 11.3536  | 3.48145  | 4.03445  | 5.00E-05 | 0.00353958 |
| P2RX6          | 17:74356167-74364831 | 0.158666 | 3.55516  | 4.48585  | 2.77155  | 0.0007   | 0.0271066  |
| HIP1R          | 17:54915865-54946127 | 45.1579  | 13.1205  | -1.78316 | -2.11451 | 0.00025  | 0.0124469  |
| MLXIP          | 17:55468195-55528501 | 71.6597  | 23.7746  | -1.59174 | -2.71087 | 5.00E-05 | 0.00353958 |
| TMEM120B       | 17:55759605-55815637 | 19.0255  | 141.881  | 2.89867  | 2.1326   | 0.0015   | 0.0478592  |
| -              | 17:58033708-58079333 | 0        | 23.5867  | inf      | nan      | 0.0002   | 0.0105774  |
| HSPB8          | 17:58405436-58418688 | 1.20173  | 10.6833  | 3.15217  | 3.5043   | 5.00E-05 | 0.00353958 |
| RASAL1         | 17:63397790-63429841 | 5.23742  | 19.2262  | 1.87615  | 1.97898  | 0.0014   | 0.0455234  |
| BT.45038       | 17:71434156-71437432 | 118.922  | 15.0554  | -2.98166 | -3.27036 | 5.00E-05 | 0.00353958 |
| BT.28253       | 17:73437808-73453708 | 11.2334  | 54.1887  | 2.27019  | 2.40716  | 0.0002   | 0.0105774  |
| BT.56667       | 17:73576017-73590296 | 15.7544  | 3.06552  | -2.36155 | -2.71971 | 5.00E-05 | 0.00353958 |
| SLC7A4         | 17:74366169-74373743 | 9.12777  | 91.2461  | 3.32143  | 4.11798  | 5.00E-05 | 0.00353958 |
| VAT1L          | 18:5045211-5211278   | 8.90073  | 0.204785 | -5.44174 | -3.81134 | 0.00015  | 0.00832163 |

|               |                      |           |          |          |          |          |            |
|---------------|----------------------|-----------|----------|----------|----------|----------|------------|
| BT.8228       | 18:10610404-10689343 | 19.2981   | 244.866  | 3.66546  | 3.09368  | 0.00045  | 0.0191737  |
| LPCAT2        | 18:23861828-23962438 | 24.7122   | 7.02311  | -1.81504 | -2.48974 | 5.00E-05 | 0.00353958 |
| GPR97         | 18:25726848-25753920 | 10.6473   | 0.355296 | -4.90533 | -3.3243  | 5.00E-05 | 0.00353958 |
| MMP15         | 18:26021949-26043124 | 0.549232  | 3.50112  | 2.67233  | 2.68587  | 0.0003   | 0.0142573  |
| NDRG4         | 18:26340550-26383749 | 3.52531   | 16.6058  | 2.23587  | 2.10677  | 0.00025  | 0.0124469  |
| BT.64827      | 18:36187857-36243479 | 6.41703   | 17.5519  | 1.45165  | 1.75384  | 0.00105  | 0.0364071  |
| HPN           | 18:45971858-45991833 | 7.80605   | 69.6492  | 3.15744  | 3.52655  | 5.00E-05 | 0.00353958 |
| GPR43         | 18:46312177-46314341 | 10.5589   | 1.1034   | -3.25842 | -2.84736 | 0.0001   | 0.00612252 |
| SPINT2        | 18:48295715-48326272 | 52.5187   | 295.686  | 2.49316  | 4.26599  | 0.00015  | 0.00832163 |
| DEDD2         | 18:51380782-51395993 | 54.9213   | 19.2577  | -1.51193 | -2.02859 | 0.0004   | 0.0176519  |
| -             | 18:52764490-52839691 | 35.8553   | 10.021   | -1.83916 | -1.8657  | 0.0009   | 0.0327957  |
| BCL3          | 18:52922333-52931384 | 48.4837   | 14.1504  | -1.77666 | -3.04364 | 5.00E-05 | 0.00353958 |
| FOSB          | 18:53493560-53508395 | 23.8502   | 4.87295  | -2.29113 | -3.15087 | 5.00E-05 | 0.00353958 |
| NLRP12        | 18:61091347-61147226 | 1.81882   | 0.225208 | -3.01368 | -2.06176 | 0.00055  | 0.0226533  |
| -             | 18:62817113-62822875 | 22.1088   | 0.706853 | -4.96706 | -4.15128 | 0.0001   | 0.00612252 |
| FCAR          | 18:62838409-62864521 | 42.3376   | 6.99273  | -2.59801 | -4.47563 | 5.00E-05 | 0.00353958 |
| -             | 18:63374717-63375764 | 39.0217   | 5.54613  | -2.81472 | -5.91761 | 0.001    | 0.0352124  |
| -             | 18:63375878-63376836 | 85.4463   | 8.46476  | -3.33548 | -8.98357 | 0.0001   | 0.00612252 |
| OSCAR         | 18:63466549-63475792 | 31.133    | 4.13001  | -2.91422 | -3.06179 | 5.00E-05 | 0.00353958 |
| TARM1         | 18:63479270-63491214 | 34.7451   | 2.14407  | -4.01838 | -2.76871 | 5.00E-05 | 0.00353958 |
| CDH16         | 18:34733117-34743031 | 0.0730254 | 10.8466  | 7.21463  | 3.94947  | 0.00025  | 0.0124469  |
| RRAD          | 18:34746054-34749250 | 3.88601   | 61.6559  | 3.98788  | 5.36273  | 5.00E-05 | 0.00353958 |
| HP            | 18:39173134-39179293 | 48.152    | 15.3953  | -1.64511 | -2.65102 | 0.00065  | 0.0256826  |
| BT.38851      | 18:43574290-43644737 | 1.74506   | 6.88209  | 1.97957  | 2.21594  | 0.0011   | 0.0377556  |
| ENSBTAG000000 | 18:51735955-51789258 | 96.0178   | 24.8422  | -1.95051 | -3.14501 | 5.00E-05 | 0.00353958 |
| PLAUR         | 18:52200758-52241181 | 731.997   | 200.227  | -1.8702  | -2.84409 | 0.00125  | 0.0418473  |
| BT.88266      | 18:57861546-57868646 | 29.337    | 2.06199  | -3.83061 | -3.48481 | 5.00E-05 | 0.00353958 |
| ENSBTAG000000 | 18:63009835-63020867 | 41.3598   | 6.84016  | -2.59613 | -3.11319 | 5.00E-05 | 0.00353958 |
| LPO           | 19:9441747-9471498   | 23.779    | 166.461  | 2.80743  | 2.13538  | 0.0008   | 0.0302886  |
| -             | 19:14757097-14764366 | 692.826   | 68.7866  | -3.33229 | -3.50052 | 5.00E-05 | 0.00353958 |
| CCL16         | 19:14782700-14786690 | 44.7312   | 5.87872  | -2.92771 | -5.07649 | 5.00E-05 | 0.00353958 |
| CCL5          | 19:14823469-14831157 | 72.0568   | 25.8252  | -1.48036 | -3.38431 | 0.0006   | 0.0240566  |
| CPD           | 19:22025795-22086708 | 24.4198   | 9.64471  | -1.34024 | -2.27982 | 0.0004   | 0.0176519  |
| RAP1GAP2      | 19:24274365-24454176 | 3.44554   | 0.620623 | -2.47294 | -1.95774 | 0.00085  | 0.0313946  |
| KDM6B         | 19:28135157-28155513 | 31.5386   | 5.76752  | -2.4511  | -2.80395 | 5.00E-05 | 0.00353958 |
| ERBB2         | 19:40722038-40745987 | 1.08177   | 4.21075  | 1.96069  | 1.88777  | 0.00135  | 0.0445369  |
| SOCS3         | 19:54458148-54459555 | 56.5836   | 10.1703  | -2.47602 | -2.62798 | 5.00E-05 | 0.00353958 |
| C19H17orf28   | 19:57076158-57097117 | 3.72437   | 13.8903  | 1.89901  | 2.04929  | 0.0006   | 0.0240566  |
| BT.88312      | 19:13752491-13996058 | 11.6438   | 67.8374  | 2.54252  | 2.23472  | 0.00145  | 0.0469248  |
| CCL4          | 19:14653466-14655028 | 210.316   | 42.129   | -2.31967 | -5.58813 | 5.00E-05 | 0.00353958 |
| TMEM132E      | 19:15792360-15810652 | 0.0821215 | 3.2794   | 5.31953  | 4.12425  | 0.0006   | 0.0240566  |

|                |                       |           |          |          |          |          |            |
|----------------|-----------------------|-----------|----------|----------|----------|----------|------------|
| CCL8           | 19:16137673-16139707  | 66.6971   | 13.0633  | -2.3521  | -4.41499 | 5.00E-05 | 0.00353958 |
| PHF12          | 19:20835679-20875590  | 27.8927   | 11.4833  | -1.28035 | -1.8845  | 0.00045  | 0.0191737  |
| SSH2           | 19:21439741-21574647  | 12.8254   | 3.27604  | -1.96897 | -2.41964 | 5.00E-05 | 0.00353958 |
| CLDN7          | 19:27602594-27604817  | 12.0447   | 62.4186  | 2.37357  | 4.00823  | 5.00E-05 | 0.00353958 |
| PIK3R5         | 19:28975558-29048771  | 22.0071   | 6.13397  | -1.84307 | -2.44047 | 5.00E-05 | 0.00353958 |
| PMP22          | 19:33357140-33382707  | 13.9731   | 38.7413  | 1.47122  | 2.57226  | 0.00045  | 0.0191737  |
| BT.27564       | 19:42877796-42888179  | 39.7175   | 16.1486  | -1.29837 | -1.95231 | 0.0005   | 0.0209753  |
| PTRF           | 19:43148012-43162165  | 4.28492   | 14.721   | 1.78054  | 1.85239  | 0.0012   | 0.0405731  |
| CYB561         | 19:48414991-48436565  | 1.7024    | 11.1385  | 2.70991  | 2.84439  | 5.00E-05 | 0.00353958 |
| GPRC5C         | 19:57641616-57656371  | 1.30223   | 9.82802  | 2.91592  | 2.73535  | 0.00015  | 0.00832163 |
| IFIH1          | 2:34217172-34272473   | 26.1272   | 9.37204  | -1.47912 | -2.42505 | 0.0001   | 0.00612252 |
| ITM2C          | 2:119476495-119490380 | 55.3267   | 19.6304  | -1.49489 | -2.39107 | 0.0009   | 0.0327957  |
| SLC30A2        | 2:127638450-127645772 | 5.13685   | 52.8444  | 3.36279  | 2.9927   | 5.00E-05 | 0.00353958 |
| E2F2           | 2:129925613-129944755 | 6.49693   | 0.970779 | -2.74254 | -2.21438 | 0.00025  | 0.0124469  |
| BT.17865       | 2:27317637-27380521   | 2.74472   | 11.1435  | 2.02147  | 1.73051  | 0.0014   | 0.0455234  |
| TSG-6          | 2:44850891-44867293   | 20.6263   | 1.44565  | -3.83469 | -4.82796 | 0.00045  | 0.0191737  |
| FZD5           | 2:96470341-96472144   | 3.98378   | 24.8246  | 2.63956  | 2.8326   | 5.00E-05 | 0.00353958 |
| BT.66847       | 2:106877084-106940905 | 460.561   | 34.0714  | -3.75676 | -2.89655 | 0.00035  | 0.0160175  |
| PTPRU          | 2:124819575-124906896 | 0.0815718 | 0.746941 | 3.19485  | 2.27545  | 0.0005   | 0.0209753  |
| SESN2          | 2:125698150-125714128 | 28.6433   | 10.6667  | -1.42508 | -1.90798 | 0.00085  | 0.0313946  |
| SYTL1          | 2:126519061-126528373 | 11.4651   | 34.7196  | 1.5985   | 1.76235  | 0.00155  | 0.0491086  |
| EXTL1          | 2:127647570-127665188 | 0.460206  | 6.17552  | 3.74621  | 2.98471  | 5.00E-05 | 0.00353958 |
| ALPL           | 2:131791679-131857642 | 16.8481   | 1.00408  | -4.06865 | -3.31547 | 5.00E-05 | 0.00353958 |
| CDA            | 2:132636461-132657392 | 8.74196   | 1.6278   | -2.42504 | -3.02242 | 0.0012   | 0.0405731  |
| KLHDC7A        | 2:134776471-134778862 | 0.982671  | 8.86991  | 3.17414  | 3.05369  | 5.00E-05 | 0.00353958 |
| FYB            | 20:35176988-35347535  | 42.8727   | 16.5995  | -1.36892 | -1.89414 | 0.0004   | 0.0176519  |
| PRLR           | 20:38951596-39137480  | 2.20903   | 10.538   | 2.25412  | 1.87845  | 0.0001   | 0.00612252 |
| BT.103339      | 20:56295178-56572213  | 2.55776   | 7.59089  | 1.56939  | 1.99323  | 0.00055  | 0.0226533  |
| FAM134B        | 20:56644738-56758641  | 20.0774   | 166.525  | 3.05209  | 2.73409  | 5.00E-05 | 0.00353958 |
| BT.85182       | 20:4449108-4452189    | 289.818   | 80.4599  | -1.84881 | -2.75009 | 0.00035  | 0.0160175  |
| TMEM171        | 20:8419596-8430125    | 2.44631   | 15.2663  | 2.64167  | 1.9984   | 0.00025  | 0.0124469  |
| NAIP           | 20:10071639-10111995  | 41.9896   | 7.40158  | -2.50413 | -3.3654  | 5.00E-05 | 0.00353958 |
| OCLN           | 20:10154908-10201157  | 1.98347   | 10.4314  | 2.39483  | 2.41663  | 0.0001   | 0.00612252 |
| FAM159B        | 20:14723559-14746350  | 2.07687   | 50.028   | 4.59025  | 2.75543  | 5.00E-05 | 0.00353958 |
| GPX8           | 20:23975639-23980445  | 2.28681   | 11.3686  | 2.31365  | 1.95939  | 0.0014   | 0.0455234  |
| FST            | 20:25588641-25594057  | 0.761861  | 7.28256  | 3.25685  | 2.47152  | 0.00035  | 0.0160175  |
| ENSBTAG0000003 | 20:55967803-56022210  | 20.3194   | 4.1961   | -2.27573 | -2.00561 | 0.0002   | 0.0105774  |
| ISG20          | 21:20013718-20031094  | 168.478   | 35.2614  | -2.2564  | -2.5049  | 5.00E-05 | 0.00353958 |
| BT.42063       | 21:22949799-23048041  | 0.971509  | 5.55393  | 2.51521  | 1.87742  | 0.00045  | 0.0191737  |
| BT.26527       | 21:27527683-27606711  | 4.09829   | 0.920506 | -2.15452 | -1.87326 | 0.0008   | 0.0302886  |
| C21H15orf27    | 21:31860164-31983703  | 0.342194  | 2.89376  | 3.08006  | 1.56919  | 0.00095  | 0.0338908  |

|                  |                      |          |          |          |          |          |            |
|------------------|----------------------|----------|----------|----------|----------|----------|------------|
| PSTPIP1          | 21:32644739-32689060 | 49.0285  | 14.6104  | -1.74663 | -2.31503 | 5.00E-05 | 0.00353958 |
| BT.104995        | 21:34724306-34734990 | 1.71173  | 12.6732  | 2.88826  | 3.36447  | 5.00E-05 | 0.00353958 |
| ATP10A           | 21:2806935-2988464   | 0.646939 | 3.72998  | 2.52747  | 1.93861  | 0.0003   | 0.0142573  |
| ARRDC4           | 21:8924762-8939028   | 63.2639  | 14.2155  | -2.15391 | -2.92368 | 5.00E-05 | 0.00353958 |
| BT.28177         | 21:12839570-13098203 | 5.27325  | 0.594762 | -3.14831 | -2.46568 | 0.00035  | 0.0160175  |
| LMAN1L           | 21:34248043-34259808 | 0.300047 | 2.55902  | 3.09233  | 2.14846  | 0.0015   | 0.0478592  |
| CMA1             | 21:35112321-35115054 | 0        | 1.1849   | inf      | nan      | 0.00015  | 0.00832163 |
| BT.88447         | 21:48214178-48217962 | 0.389794 | 3.38984  | 3.12044  | 3.05297  | 0.00115  | 0.0393723  |
| GPR68            | 21:56588075-56625811 | 4.06703  | 19.9423  | 2.29378  | 2.25085  | 5.00E-05 | 0.00353958 |
| TRANK1           | 22:10626377-10722545 | 21.3319  | 5.72644  | -1.8973  | -2.46928 | 5.00E-05 | 0.00353958 |
| BT.46336         | 22:15280707-15312566 | 1.51334  | 12.0496  | 2.99317  | 2.52958  | 5.00E-05 | 0.00353958 |
| PRRT3,TMEM111    | 22:16833932-16863951 | 168.175  | 729.269  | 2.11649  | 6.88145  | 5.00E-05 | 0.00353958 |
| LRIG1            | 22:35068217-35181384 | 1.47886  | 13.1715  | 3.15486  | 2.49871  | 5.00E-05 | 0.00353958 |
| MAG11            | 22:35874897-36134917 | 3.0528   | 14.8935  | 2.28648  | 1.99404  | 5.00E-05 | 0.00353958 |
| UBA7             | 22:50991901-51000966 | 40.2016  | 13.8362  | -1.5388  | -2.29075 | 0.0002   | 0.0105774  |
| LTF              | 22:53521699-53556089 | 41.1082  | 304.761  | 2.89018  | 2.61247  | 0.0013   | 0.0430966  |
| BT.106550        | 22:53900594-53945136 | 4.11831  | 0.629401 | -2.71    | -2.15308 | 0.00045  | 0.0191737  |
| SLC38A3          | 22:50702768-50717581 | 3.17898  | 30.0816  | 3.24225  | 2.89924  | 5.00E-05 | 0.00353958 |
| SEMA3F           | 22:50733156-50769905 | 1.85888  | 8.04276  | 2.11326  | 2.14852  | 0.0005   | 0.0209753  |
| CCRL2            | 22:53567796-53584659 | 94.1187  | 12.0974  | -2.95978 | -3.95925 | 5.00E-05 | 0.00353958 |
| CLEC3B           | 22:54791194-54797301 | 4.56412  | 38.7651  | 3.08635  | 4.48287  | 5.00E-05 | 0.00353958 |
| LTB              | 23:27529855-27531864 | 33.5207  | 3.51818  | -3.25215 | -3.23001 | 5.00E-05 | 0.00353958 |
| IER3             | 23:28088455-28089722 | 143.955  | 45.2637  | -1.6692  | -3.26205 | 5.00E-05 | 0.00353958 |
| BT.88525         | 23:13057052-13095621 | 2.34376  | 37.2121  | 3.98887  | 3.5071   | 5.00E-05 | 0.00353958 |
| TREML2           | 23:15122241-15134716 | 90.4912  | 32.6937  | -1.46877 | -1.95388 | 0.0007   | 0.0271066  |
| TREM1            | 23:15148076-15163188 | 151.592  | 55.7001  | -1.44445 | -2.65253 | 0.00075  | 0.0287966  |
| GPR110           | 23:20206357-20252189 | 0.52387  | 17.675   | 5.07636  | 4.43255  | 5.00E-05 | 0.00353958 |
| BT.49282         | 23:22162641-22189911 | 3.44817  | 46.4106  | 3.75055  | 3.85575  | 5.00E-05 | 0.00353958 |
| TNF              | 23:27533910-27536674 | 13.7311  | 2.16409  | -2.66562 | -2.63518 | 5.00E-05 | 0.00353958 |
| DDR1             | 23:27975618-27991748 | 2.45291  | 9.91669  | 2.01536  | 2.23701  | 0.0002   | 0.0105774  |
| DSP              | 23:47670502-47714288 | 2.89919  | 12.1219  | 2.06389  | 2.1139   | 0.0002   | 0.0105774  |
| PTPRM            | 24:40768712-41437121 | 0.143365 | 2.2353   | 3.9627   | 2.88328  | 5.00E-05 | 0.00353958 |
| MAPK4            | 24:50684777-50745042 | 0.45974  | 3.78936  | 3.04306  | 2.39028  | 0.0003   | 0.0142573  |
| BT.53705         | 24:62591412-62609170 | 31.9034  | 10.3182  | -1.62851 | -2.38219 | 0.00085  | 0.0313946  |
| BT.58893         | 24:12741839-12765329 | 44.6095  | 0.752342 | -5.88982 | -5.22904 | 5.00E-05 | 0.00353958 |
| DSG2             | 24:25913548-25964768 | 0.59565  | 3.307    | 2.47299  | 2.41747  | 5.00E-05 | 0.00353958 |
| COLEC12          | 24:35630928-35816269 | 0.466344 | 21.9595  | 5.55731  | 5.03895  | 5.00E-05 | 0.00353958 |
| CIDEA            | 24:43231406-43233297 | 52.6711  | 327.722  | 2.63739  | 2.38801  | 5.00E-05 | 0.00353958 |
| PSTPIP2          | 24:46196112-46290465 | 43.1864  | 8.94277  | -2.27178 | -3.14743 | 5.00E-05 | 0.00353958 |
| BT.66080,SERPINI | 24:62356931-62451599 | 237.799  | 12.174   | -4.28787 | -4.62899 | 5.00E-05 | 0.00353958 |
| CACNA1H          | 25:959757-984950     | 1.88308  | 6.93793  | 1.88141  | 1.86723  | 0.00155  | 0.0491086  |

|                 |                      |          |          |          |          |          |            |
|-----------------|----------------------|----------|----------|----------|----------|----------|------------|
| MMP25           | 25:2478688-2489925   | 51.457   | 5.05974  | -3.34623 | -3.50493 | 5.00E-05 | 0.00353958 |
| TMC5            | 25:17123540-17201663 | 0.807691 | 7.5667   | 3.22779  | 2.69454  | 5.00E-05 | 0.00353958 |
| IL21R           | 25:25208664-25268874 | 9.76577  | 1.73865  | -2.48977 | -2.47767 | 5.00E-05 | 0.00353958 |
| RABGEF1         | 25:28482573-28534880 | 39.4746  | 14.6624  | -1.42881 | -1.97342 | 0.00095  | 0.0338908  |
| CLDN3           | 25:34018455-34019669 | 21.6365  | 145.13   | 2.7458   | 4.41009  | 5.00E-05 | 0.00353958 |
| BT.45760        | 25:2214196-2217438   | 8.56275  | 47.395   | 2.46859  | 2.12826  | 0.0002   | 0.0105774  |
| BT.106170       | 25:2230776-2232712   | 3.78093  | 22.6768  | 2.5844   | 4.11093  | 0.00075  | 0.0287966  |
| MEFV            | 25:2691853-2704324   | 83.799   | 5.39961  | -3.95601 | -4.19264 | 5.00E-05 | 0.00353958 |
| GPRC5B          | 25:17588927-17608885 | 6.43639  | 73.975   | 3.52271  | 5.19832  | 5.00E-05 | 0.00353958 |
| BT.46193,PRSS36 | 25:27485085-27501201 | 7.22167  | 31.2565  | 2.11375  | 2.72343  | 0.00015  | 0.00832163 |
| NCF1            | 25:33267457-33282335 | 287.797  | 98.5979  | -1.54542 | -2.53891 | 0.00095  | 0.0338908  |
| ELN             | 25:33787888-33820672 | 1.71198  | 0.175684 | -3.28461 | -2.39713 | 0.00035  | 0.0160175  |
| SERPINE1        | 25:36198559-36206859 | 20.4964  | 4.22348  | -2.27886 | -3.25374 | 5.00E-05 | 0.00353958 |
| AZGP1           | 25:36981868-36986566 | 36.9501  | 255.046  | 2.78711  | 2.29705  | 0.00035  | 0.0160175  |
| DAGLB           | 25:38842843-38866581 | 73.0929  | 25.2822  | -1.53161 | -2.04706 | 0.00055  | 0.0226533  |
| IFIT2           | 26:11064495-11071316 | 107.875  | 17.388   | -2.6332  | -3.04162 | 5.00E-05 | 0.00353958 |
| IFIT1,IFIT3     | 26:11079573-11110084 | 315.676  | 45.5855  | -2.7918  | -3.16754 | 5.00E-05 | 0.00353958 |
| IFIT5           | 26:11117505-11127464 | 40.2622  | 17.3718  | -1.21268 | -2.14533 | 0.001    | 0.0352124  |
| SCD             | 26:21132134-21133969 | 90.9211  | 640.836  | 2.81727  | 2.08306  | 5.00E-05 | 0.00353958 |
| TACC2           | 26:42274440-42485654 | 0.936448 | 4.60303  | 2.29731  | 1.92934  | 0.0001   | 0.00612252 |
| ANKRD22         | 26:10542378-10570091 | 42.2035  | 12.9726  | -1.7019  | -3.02195 | 0.0002   | 0.0105774  |
| BT.65021        | 26:21141591-21149319 | 85.2596  | 794.297  | 3.21975  | 2.87825  | 0.00025  | 0.0124469  |
| DEFB7           | 27:5219283-5227956   | 134.748  | 29.2772  | -2.20241 | -8.49167 | 0.00085  | 0.0313946  |
| ENSBTAG0000004  | 27:5327038-5328959   | 316.209  | 65.7224  | -2.26642 | -2.23469 | 5.00E-05 | 0.00353958 |
| -               | 27:24255146-24256902 | 535.79   | 83.6796  | -2.67872 | -1.34561 | 0.0007   | 0.0271066  |
| PDLIM3          | 27:14769570-14800205 | 0.735049 | 7.52869  | 3.35649  | 3.41137  | 0.00025  | 0.0124469  |
| KCNK1           | 28:6492388-6559855   | 2.6249   | 23.2183  | 3.14493  | 3.96285  | 5.00E-05 | 0.00353958 |
| RET             | 28:13562992-13615888 | 0.139094 | 5.73589  | 5.36588  | 3.97611  | 5.00E-05 | 0.00353958 |
| PHYHIPL         | 28:14904832-15136823 | 1.52089  | 19.1879  | 3.65721  | 3.58737  | 0.0001   | 0.00612252 |
| PLAU            | 28:29962495-29971029 | 282.117  | 56.9298  | -2.30904 | -2.47656 | 0.00025  | 0.0124469  |
| LYST            | 28:8417602-8598463   | 115.988  | 22.4293  | -2.37051 | -3.74148 | 0.0001   | 0.00612252 |
| ANK3            | 28:15818094-16073196 | 1.49388  | 5.0995   | 1.77129  | 1.72701  | 0.00135  | 0.0445369  |
| KCNMA1          | 28:32807350-33587986 | 0.127753 | 1.76304  | 3.78664  | 2.36583  | 0.0012   | 0.0405731  |
| BT.43006        | 29:9806834-9927317   | 5.74828  | 121.879  | 4.40617  | 3.47838  | 5.00E-05 | 0.00353958 |
| ST14            | 29:36925362-36971367 | 17.1105  | 47.9589  | 1.48692  | 2.21944  | 0.0003   | 0.0142573  |
| MS4A8B          | 29:37622090-37654922 | 49.231   | 8.41353  | -2.54878 | -2.85235 | 5.00E-05 | 0.00353958 |
| SCGB1D          | 29:41378326-41381132 | 234.869  | 2868.9   | 3.61057  | 10.7429  | 0.0001   | 0.00612252 |
| SCGB2A2         | 29:41396638-41400056 | 10.6905  | 198.109  | 4.21189  | 10.5538  | 5.00E-05 | 0.00353958 |
| TM7SF2          | 29:43981730-43986407 | 4.59252  | 18.4815  | 2.00872  | 2.23501  | 0.0004   | 0.0176519  |
| TBC1D10C        | 29:45942057-45947879 | 6.17174  | 1.33451  | -2.20937 | -2.126   | 0.00025  | 0.0124469  |
| IFITM3          | 29:51367008-51368065 | 1148.72  | 218.429  | -2.39478 | -6.86769 | 5.00E-05 | 0.00353958 |

|                 |                       |          |          |          |          |          |            |
|-----------------|-----------------------|----------|----------|----------|----------|----------|------------|
| ALDH3B2         | 29:46143362-46150328  | 5.84146  | 22.609   | 1.95249  | 1.97148  | 0.0009   | 0.0327957  |
| FCGR3A          | 3:7996470-8005228     | 19.7074  | 4.13539  | -2.25265 | -2.68694 | 5.00E-05 | 0.00353958 |
| PVRL4           | 3:8421827-8438222     | 0.694016 | 3.63612  | 2.38936  | 2.31581  | 0.0005   | 0.0209753  |
| CD244           | 3:8794760-8831787     | 19.961   | 3.22135  | -2.63145 | -2.74341 | 5.00E-05 | 0.00353958 |
| S100A8          | 3:17146917-17147898   | 1045.82  | 94.2746  | -3.47162 | -22.1332 | 5.00E-05 | 0.00353958 |
| FMO5            | 3:22571921-22615024   | 3.01574  | 11.0913  | 1.87884  | 2.54958  | 0.0001   | 0.00612252 |
| AMIGO1          | 3:34054794-34060289   | 0.159249 | 1.08736  | 2.77147  | 2.29615  | 0.0008   | 0.0302886  |
| GBP5            | 3:54253031-54269514   | 10.2503  | 2.02578  | -2.33911 | -2.2699  | 0.00055  | 0.0226533  |
| MCOLN2          | 3:59286294-59351124   | 1.68884  | 7.35581  | 2.12285  | 2.18281  | 0.001    | 0.0352124  |
| WLS             | 3:77396242-77511241   | 79.0647  | 8.78026  | -3.1707  | -4.14795 | 5.00E-05 | 0.00353958 |
| SLC6A9          | 3:102623350-102659082 | 47.1265  | 18.172   | -1.37482 | -2.2225  | 0.0013   | 0.0430966  |
| HIVEP3          | 3:105213589-105268006 | 8.87475  | 3.4156   | -1.37757 | -1.82762 | 0.00035  | 0.0160175  |
| CSF3R           | 3:109993814-110014737 | 242.267  | 14.0345  | -4.10955 | -3.36418 | 5.00E-05 | 0.00353958 |
| BT.29245        | 3:117584072-117637812 | 1.13471  | 19.642   | 4.11354  | 3.64916  | 5.00E-05 | 0.00353958 |
| HSPA6           | 3:8027844-8029776     | 236.687  | 20.8566  | -3.5044  | -3.77452 | 5.00E-05 | 0.00353958 |
| S100A9          | 3:17176216-17179005   | 864.742  | 54.9293  | -3.97662 | -4.13863 | 5.00E-05 | 0.00353958 |
| CGN             | 3:19290675-19315945   | 1.65355  | 6.65054  | 2.00791  | 1.97951  | 0.0003   | 0.0142573  |
| CD101           | 3:26317280-26364621   | 6.8731   | 0.96846  | -2.8272  | -2.85286 | 5.00E-05 | 0.00353958 |
| -               | 3:31991617-31996063   | 1459.75  | 404.024  | -1.85321 | -8.6347  | 5.00E-05 | 0.00353958 |
| CSF1            | 3:33603162-33621087   | 114.245  | 25.8173  | -2.14572 | -2.33319 | 0.0001   | 0.00612252 |
| KIAA1324        | 3:34313871-34387455   | 1.58508  | 9.75962  | 2.62227  | 2.48602  | 5.00E-05 | 0.00353958 |
| LRRC8C          | 3:53717831-53810701   | 3.97959  | 12.7489  | 1.67968  | 2.16894  | 0.00105  | 0.0364071  |
| LPHN2           | 3:62643352-62946195   | 0.615803 | 5.49487  | 3.15754  | 2.76775  | 5.00E-05 | 0.00353958 |
| -               | 3:68361329-68612507   | 0        | 111.37   | inf      | nan      | 5.00E-05 | 0.00353958 |
| PDE4B           | 3:79274270-79823433   | 43.8778  | 6.26967  | -2.80703 | -3.3592  | 5.00E-05 | 0.00353958 |
| SLC5A9          | 3:98567048-98595504   | 0.723729 | 12.6909  | 4.13219  | 3.83412  | 5.00E-05 | 0.00353958 |
| PTPRF           | 3:102998561-103074320 | 2.70276  | 13.248   | 2.29327  | 2.6653   | 0.00015  | 0.00832163 |
| TMEM125         | 3:103337707-103340965 | 5.96459  | 21.1683  | 1.82741  | 1.92877  | 0.00105  | 0.0364071  |
| MFSD2           | 3:106724608-106737437 | 4.36412  | 25.8958  | 2.56896  | 2.77781  | 5.00E-05 | 0.00353958 |
| ZC3H12A         | 3:108990073-108999454 | 20.6501  | 8.22785  | -1.32756 | -1.84702 | 0.00125  | 0.0418473  |
| RUNDC3B         | 4:32691261-32858257   | 0.173116 | 1.25656  | 2.85967  | 2.21893  | 0.0007   | 0.0271066  |
| FGL2            | 4:44236253-44240215   | 50.8471  | 17.5574  | -1.53409 | -2.62396 | 0.0006   | 0.0240566  |
| PRKAR2B         | 4:48434954-48535433   | 4.84544  | 15.5491  | 1.68213  | 2.39505  | 0.0015   | 0.0478592  |
| BT.64791        | 4:60940662-61125662   | 8.79123  | 0.67288  | -3.70764 | -3.57372 | 5.00E-05 | 0.00353958 |
| MGAM            | 4:106115756-106206212 | 3.13845  | 0.681881 | -2.20246 | -2.43512 | 0.00015  | 0.00832163 |
| BT.20327        | 4:7528099-7556554     | 109.829  | 12.0911  | -3.18324 | -4.15246 | 5.00E-05 | 0.00353958 |
| SAMD9           | 4:10302666-10337973   | 33.9178  | 9.18037  | -1.88542 | -2.28111 | 5.00E-05 | 0.00353958 |
| AGMO            | 4:23499625-23891236   | 0.39384  | 3.80078  | 3.27061  | 2.63647  | 0.0004   | 0.0176519  |
| STEAP4          | 4:72833496-72862043   | 17.7043  | 2.86484  | -2.62758 | -3.49258 | 0.00015  | 0.00832163 |
| BT.89244,ENSBTA | 4:99787243-99950827   | 63.4178  | 26.4347  | -1.26245 | -2.11491 | 0.00085  | 0.0313946  |
| PTN             | 4:101685423-101795483 | 0        | 0.772022 | inf      | nan      | 5.00E-05 | 0.00353958 |



|                |                       |          |          |          |          |          |            |
|----------------|-----------------------|----------|----------|----------|----------|----------|------------|
| NFE2           | 5:25929034-25936083   | 41.027   | 6.15234  | -2.73736 | -2.53086 | 5.00E-05 | 0.00353958 |
| BT.87815       | 5:27213749-27221177   | 13.509   | 46.8163  | 1.79309  | 2.61177  | 0.00045  | 0.0191737  |
| BT.61413       | 5:31155390-31176231   | 2.05272  | 22.3209  | 3.44279  | 3.14043  | 5.00E-05 | 0.00353958 |
| NELL2          | 5:35656888-36042694   | 3.92856  | 50.1313  | 3.67364  | 3.81371  | 5.00E-05 | 0.00353958 |
| AGAP2          | 5:56047710-56062903   | 5.23671  | 1.31125  | -1.99772 | -2.02504 | 0.0006   | 0.0240566  |
| C5H12orf75     | 5:69161771-69249283   | 45.1169  | 4.18429  | -3.43061 | -3.39703 | 5.00E-05 | 0.00353958 |
| TIMP3          | 5:71475846-71926718   | 3.96971  | 32.2703  | 3.0231   | 3.19451  | 5.00E-05 | 0.00353958 |
| USP18          | 5:76375511-76406656   | 24.3466  | 7.80237  | -1.64173 | -2.15504 | 0.0004   | 0.0176519  |
| PTHLH          | 5:82241899-82258858   | 7.122    | 52.6834  | 2.88699  | 2.17678  | 5.00E-05 | 0.00353958 |
| A2M            | 5:101297569-101346611 | 30.5596  | 12.1044  | -1.33609 | -1.93713 | 0.00045  | 0.0191737  |
| SCNN1A         | 5:104364799-104396610 | 1.67658  | 7.47594  | 2.15673  | 1.95964  | 0.00065  | 0.0256826  |
| B4GALNT3       | 5:107901713-107934878 | 2.75651  | 25.3504  | 3.20109  | 2.88756  | 5.00E-05 | 0.00353958 |
| BT.48025       | 5:111044939-111048603 | 164.868  | 47.3567  | -1.79967 | -2.38319 | 5.00E-05 | 0.00353958 |
| TSPAN19        | 5:14721025-14748058   | 0.783894 | 7.35661  | 3.23031  | 2.57667  | 0.00095  | 0.0338908  |
| BT.65129       | 5:27171924-27175575   | 7.01167  | 27.0353  | 1.94702  | 2.63561  | 0.00015  | 0.00832163 |
| NR4A1          | 5:27977006-27992869   | 36.0213  | 10.6745  | -1.75468 | -2.01857 | 0.0004   | 0.0176519  |
| C5H12orf68     | 5:32277007-32278883   | 0.617873 | 9.4535   | 3.93547  | 3.75312  | 5.00E-05 | 0.00353958 |
| ERBB3          | 5:57539932-57560884   | 1.63906  | 5.85697  | 1.83728  | 2.17739  | 0.00065  | 0.0256826  |
| BICD1          | 5:77857447-78101845   | 0.452357 | 3.23224  | 2.837    | 2.00494  | 5.00E-05 | 0.00353958 |
| KIAA1467       | 5:97259780-97299577   | 6.31148  | 24.1306  | 1.93481  | 2.27037  | 0.00015  | 0.00832163 |
| -              | 5:98916301-98934999   | 8.02107  | 92.2651  | 3.52392  | 2.50242  | 5.00E-05 | 0.00353958 |
| LEPREL2        | 5:103972417-103985413 | 1.73962  | 7.87582  | 2.17866  | 2.0634   | 0.0004   | 0.0176519  |
| NFAM1          | 5:113836090-113882202 | 88.1681  | 32.7753  | -1.42765 | -1.92673 | 0.00055  | 0.0226533  |
| IL17REL        | 5:120992218-121010327 | 17.2015  | 4.67673  | -1.87896 | -1.92277 | 0.00095  | 0.0338908  |
| ABCG2          | 6:37903128-38030583   | 30.2338  | 286.618  | 3.2449   | 2.88241  | 0.0001   | 0.00612252 |
| BT.61466       | 6:46724497-46749777   | 12.0437  | 212.441  | 4.14071  | 3.76056  | 5.00E-05 | 0.00353958 |
| IL-8           | 6:90559881-90563647   | 321.519  | 52.9126  | -2.60322 | -4.39343 | 5.00E-05 | 0.00353958 |
| CXCL2          | 6:90695493-90697557   | 406.534  | 52.4289  | -2.95494 | -4.77006 | 5.00E-05 | 0.00353958 |
| CXCL2          | 6:90811061-90824841   | 601.662  | 100.226  | -2.5857  | -3.29173 | 5.00E-05 | 0.00353958 |
| DKFZP564O0823  | 6:91597121-91723390   | 50.8164  | 15.7492  | -1.69002 | -2.7142  | 0.0001   | 0.00612252 |
| SHROOM3        | 6:93218439-93398475   | 1.6177   | 5.21808  | 1.68957  | 1.67317  | 0.00095  | 0.0338908  |
| HERC5          | 6:37681999-37728536   | 13.9265  | 3.40233  | -2.03324 | -2.66782 | 5.00E-05 | 0.00353958 |
| BTC            | 6:91430304-91480129   | 0.421054 | 3.01842  | 2.84172  | 2.39086  | 0.0003   | 0.0142573  |
| HPSE           | 6:99846840-99892778   | 4.50498  | 16.4996  | 1.87284  | 2.02663  | 0.0007   | 0.0271066  |
| KLHL8          | 6:103829607-103897375 | 49.8401  | 13.6469  | -1.86874 | -3.0448  | 5.00E-05 | 0.00353958 |
| FGFBP1         | 6:115940218-115943190 | 37.2417  | 342.277  | 3.20017  | 3.804    | 5.00E-05 | 0.00353958 |
| PROM1          | 6:115980288-116111860 | 2.92624  | 10.211   | 1.803    | 1.91263  | 0.0014   | 0.0455234  |
| BT.44422       | 7:5233485-5249994     | 7.11095  | 1.89242  | -1.90981 | -2.22136 | 0.0003   | 0.0142573  |
| BT.25655       | 7:8508032-8532514     | 2.0093   | 0.159261 | -3.65723 | -1.53919 | 0.0002   | 0.0105774  |
| ENSBTAG000000C | 7:11603167-11942226   | 4.83632  | 0.554586 | -3.12443 | -3.03116 | 5.00E-05 | 0.00353958 |
| EMR3           | 7:12205984-12271032   | 54.953   | 17.7348  | -1.63162 | -2.42746 | 5.00E-05 | 0.00353958 |

|                |                       |          |          |          |          |          |            |
|----------------|-----------------------|----------|----------|----------|----------|----------|------------|
| RETN           | 7:17737515-17738903   | 178.592  | 58.1643  | -1.61846 | -4.58873 | 0.0006   | 0.0240566  |
| C19ORF59       | 7:17745296-17749750   | 62.8324  | 6.5827   | -3.25476 | -3.15133 | 5.00E-05 | 0.00353958 |
| BT.64160       | 7:19076009-19080237   | 19.5281  | 5.35229  | -1.86733 | -2.1957  | 0.0006   | 0.0240566  |
| IRF1           | 7:23235248-23313486   | 60.3512  | 18.6439  | -1.69468 | -2.67272 | 5.00E-05 | 0.00353958 |
| ABCA7          | 7:45164376-45182208   | 2.64263  | 0.870202 | -1.60255 | -1.92656 | 0.00125  | 0.0418473  |
| REEP6          | 7:45515184-45520639   | 8.84319  | 32.6029  | 1.88236  | 1.64964  | 0.0014   | 0.0455234  |
| EGR1           | 7:51438726-51442500   | 95.0378  | 24.5571  | -1.95236 | -2.46044 | 0.0004   | 0.0176519  |
| HSH2D          | 7:7873254-7894542     | 20.5641  | 2.14509  | -3.26102 | -2.68509 | 0.0001   | 0.00612252 |
| bta-mir-23a    | 7:12981969-12987444   | 226.343  | 0        | -inf     | nan      | 0.0007   | 0.0271066  |
| IER2           | 7:13543663-13548050   | 94.3264  | 28.7442  | -1.71439 | -2.29484 | 0.00015  | 0.00832163 |
| MUC16          | 7:14314679-14384939   | 1.14353  | 4.56965  | 1.99859  | 1.64695  | 0.00065  | 0.0256826  |
| ICAM3          | 7:16087158-16094419   | 78.537   | 6.14744  | -3.67531 | -5.01711 | 5.00E-05 | 0.00353958 |
| CDKN2D         | 7:16298107-16300588   | 26.8788  | 7.14383  | -1.9117  | -3.04277 | 0.0001   | 0.00612252 |
| CD320          | 7:18183236-18187953   | 10.4699  | 67.9331  | 2.69787  | 4.14719  | 5.00E-05 | 0.00353958 |
| EMR1,EMR4P     | 7:18709362-18834730   | 70.412   | 8.00555  | -3.13675 | -3.83606 | 5.00E-05 | 0.00353958 |
| TNFSF9         | 7:19187446-19190363   | 19.4675  | 2.2379   | -3.12085 | -4.15245 | 5.00E-05 | 0.00353958 |
| S1PR4          | 7:21889525-21890683   | 10.0332  | 0.612558 | -4.0338  | -4.72724 | 0.0011   | 0.0377556  |
| BT.68694       | 7:27820354-27998816   | 2.5273   | 8.34027  | 1.7225   | 2.41749  | 0.00015  | 0.00832163 |
| SBNO2          | 7:45208809-45251042   | 41.867   | 13.8654  | -1.59433 | -2.29531 | 0.0003   | 0.0142573  |
| HBEGF          | 7:53216664-53227848   | 61.2998  | 21.3669  | -1.5205  | -2.22113 | 0.0001   | 0.00612252 |
| PCDH1          | 7:54617560-54639999   | 1.1182   | 7.20234  | 2.68728  | 2.46502  | 5.00E-05 | 0.00353958 |
| BT.44707       | 7:71158811-71250704   | 16.8219  | 1.41377  | -3.57273 | -3.72935 | 5.00E-05 | 0.00353958 |
| C8ORF80        | 8:10584387-10632157   | 0.100347 | 2.17124  | 4.43545  | 2.92646  | 0.0003   | 0.0142573  |
| PGM5           | 8:44682698-44892128   | 0.21759  | 1.45769  | 2.74401  | 2.48932  | 0.0015   | 0.0478592  |
| FAM189A2       | 8:45739649-45816965   | 0.986455 | 8.66616  | 3.13507  | 2.47443  | 0.0001   | 0.00612252 |
| UNC13B         | 8:59797488-60010848   | 3.68984  | 17.5914  | 2.25324  | 2.65183  | 5.00E-05 | 0.00353958 |
| ENSBTAG0000001 | 8:60020193-60120722   | 2.03332  | 19.3596  | 3.25114  | 3.0174   | 5.00E-05 | 0.00353958 |
| SLC39A14       | 8:70186538-70237645   | 3.12168  | 12.2061  | 1.96721  | 2.41056  | 0.00015  | 0.00832163 |
| PTK2B          | 8:75713096-75850738   | 72.7928  | 31.2175  | -1.22144 | -1.75557 | 0.00145  | 0.0469248  |
| FGD3           | 8:85810471-85852096   | 27.1366  | 8.98638  | -1.59443 | -2.21706 | 0.00015  | 0.00832163 |
| SEMA4D         | 8:90136711-90262973   | 79.4297  | 25.8964  | -1.61693 | -2.75647 | 0.0001   | 0.00612252 |
| PD-L1          | 8:39494264-39514666   | 50.641   | 20.4931  | -1.30517 | -1.82246 | 0.0012   | 0.0405731  |
| EGR3           | 8:70503424-70506163   | 77.2516  | 8.48057  | -3.18733 | -3.35366 | 5.00E-05 | 0.00353958 |
| AQP3           | 8:76525368-76531334   | 3.66275  | 31.3067  | 3.09547  | 4.01874  | 5.00E-05 | 0.00353958 |
| CNTFR          | 8:77260171-77299493   | 4.75466  | 23.958   | 2.33309  | 2.06371  | 0.00025  | 0.0124469  |
| SLC28A3        | 8:78871654-78944400   | 14.4442  | 81.8269  | 2.50208  | 2.58245  | 0.00085  | 0.0313946  |
| C9ORF4         | 8:100371528-100399097 | 0        | 1.30168  | inf      | nan      | 5.00E-05 | 0.00353958 |
| LPAR1          | 8:102051153-102217077 | 1.41223  | 7.28918  | 2.36779  | 2.4118   | 0.00015  | 0.00832163 |
| ENSBTAG0000001 | 8:103906600-103911708 | 0.679698 | 12.7195  | 4.22601  | 4.43544  | 0.0015   | 0.0478592  |
| MEGF9          | 8:111915499-111995270 | 16.1444  | 3.40427  | -2.24562 | -2.3879  | 5.00E-05 | 0.00353958 |
| SLC22A16       | 9:40231966-40267950   | 2.12538  | 24.2125  | 3.50996  | 3.44819  | 5.00E-05 | 0.00353958 |

|                |                       |           |          |          |          |          |            |
|----------------|-----------------------|-----------|----------|----------|----------|----------|------------|
| EPHA7          | 9:57622906-57830272   | 0.181471  | 2.76037  | 3.92705  | 3.02784  | 5.00E-05 | 0.00353958 |
| BT.57034       | 9:64859551-64870020   | 2.02968   | 26.2799  | 3.69463  | 5.2049   | 5.00E-05 | 0.00353958 |
| ENPP3          | 9:70588606-70673279   | 0.73113   | 7.1673   | 3.29323  | 3.37713  | 5.00E-05 | 0.00353958 |
| TNFAIP3        | 9:76763099-76777138   | 49.361    | 14.7655  | -1.74114 | -2.29067 | 0.00015  | 0.00832163 |
| STX11          | 9:82583794-82639192   | 30.515    | 6.56314  | -2.21706 | -2.42632 | 0.0001   | 0.00612252 |
| -              | 9:96501900-96514343   | 1573.05   | 0        | -inf     | nan      | 5.00E-05 | 0.00353958 |
| SYTL3          | 9:96514751-96597679   | 8.10016   | 0.881938 | -3.1992  | -2.21304 | 0.0011   | 0.0377556  |
| SOD2           | 9:97399001-97404522   | 3641.68   | 684.545  | -2.41139 | -2.60619 | 5.00E-05 | 0.00353958 |
| SLC22A1        | 9:97750745-97787561   | 5.83155   | 0.284786 | -4.35593 | -1.40731 | 5.00E-05 | 0.00353958 |
| ENSBTAG0000001 | 9:64879263-64929935   | 1.95378   | 27.2936  | 3.80422  | 5.78595  | 5.00E-05 | 0.00353958 |
| PTPRK          | 9:66968685-67594209   | 0.813182  | 4.70242  | 2.53175  | 2.65177  | 5.00E-05 | 0.00353958 |
| BT.42521       | 9:71884620-71925947   | 119.353   | 11.3533  | -3.39405 | -4.16899 | 5.00E-05 | 0.00353958 |
| IL20RA         | 9:75979323-76012398   | 0.305053  | 3.72609  | 3.61053  | 2.46433  | 0.00025  | 0.0124469  |
| TAGAP          | 9:96806293-96815764   | 42.6427   | 12.5792  | -1.76126 | -2.54673 | 0.00015  | 0.00832163 |
| -              | GJ060129.1:7619-18461 | 13.4924   | 3.36943  | -2.00158 | -1.93569 | 0.00055  | 0.0226533  |
| -              | X:16960162-16960953   | 403.106   | 39.276   | -3.35944 | -25.4195 | 0.00025  | 0.0124469  |
| BT.88817       | X:39828309-39835611   | 14.2959   | 51.7776  | 1.85672  | 3.1623   | 0.0004   | 0.0176519  |
| AVPR2          | X:40036387-40038823   | 1.83369   | 17.3621  | 3.24312  | 2.96342  | 5.00E-05 | 0.00353958 |
| ACE2           | X:135148212-135198057 | 0.0805656 | 0.984658 | 3.61139  | 2.3945   | 0.0015   | 0.0478592  |
| ASB11,PIGA     | X:135418859-135465103 | 14.8845   | 81.5424  | 2.45374  | 3.18702  | 5.00E-05 | 0.00353958 |
| CAPN6          | X:64684213-64709791   | 14.6522   | 3.8368   | -1.93314 | -2.04219 | 0.0009   | 0.0327957  |
| XK             | X:111157578-111204611 | 1.92229   | 11.9906  | 2.64101  | 2.03183  | 0.00095  | 0.0338908  |
| ENSBTAG0000004 | X:124082650-124083682 | 0         | 0.64291  | inf      | nan      | 0.0001   | 0.00612252 |
