# Supplementary material for: Differential expression of genes in milk of dairy cattle during lactation
Source: PubMed Central journal article supplement — Anim Genet. 2015 Dec 22;47(2):174–80. doi: 10.1111/age.12394 (PMC5064620; doi:10.1111/age.12394), 2015-12-22
Supplement: AGE-47-174-s010.pdf [file AGE-47-174-s010.pdf]

Table S10 Details of differentially expressed genes located within reported QTL regions for milk production traits

| Gene                       | Location               | Comparison | Traits ( pubmed_id)                                                                                                                                          |
|----------------------------|------------------------|------------|--------------------------------------------------------------------------------------------------------------------------------------------------------------|
| MX2                        | 1:143119271-143155057  | H10 vs H70 | Milk protein yield (daughter deviation) (12487475)                                                                                                           |
| BT.100456                  | 11:92577650-92665089   | H10 vs H70 | Milk yield (18218765)                                                                                                                                        |
| BT.88795                   | 11:107260652-107261718 | H10 vs H70 | Milk fat percentage (EBV) (21048968)                                                                                                                         |
| CTNNA2, ENSBTAG00000047167 | 11:54723189-55906462   | H10 vs H70 | Milk protein yield (EBV) (18650300)                                                                                                                          |
| IFITM2                     | 11:107191849-107203683 | H10 vs H70 | Milk fat percentage (EBV) (21048968)                                                                                                                         |
| CREM                       | 13:18496783-18563503   | H10 vs H70 | Milk protein yield (EBV) (18650300)                                                                                                                          |
| SLC45A4                    | 14:3711836-3740304     | H10 vs H70 | Milk fat percentage (EBV) (21048968);Milk fat yield (EBV) (18650300);Milk yield (EBV) (21048968)                                                             |
| SLA                        | 14:9261889-9508938     | H10 vs H70 | Milk protein yield (EBV) (18650300);Milk yield (18218765);Milk yield (EBV) (18650300)                                                                        |
| TRIB1                      | 14:16353387-16361545   | H10 vs H70 | Milk fat percentage (EBV) (21749477)                                                                                                                         |
| H3F3C, PRKDC               | 14:21033276-21164037   | H10 vs H70 | Milk fat percentage (EBV) (21749477)                                                                                                                         |
| CA8                        | 14:27637560-27719848   | H10 vs H70 | Milk protein yield (EBV) (21048968)                                                                                                                          |
| BT.44982, BT.91045         | 15:52255759-52271899   | H10 vs H70 | Milk protein percentage (21605784)                                                                                                                           |
| MUC15                      | 15:57913543-58130615   | H10 vs H70 | Milk fat yield (EBV) (22303313);Milk protein yield (22303313);Milk protein yield (EBV) (22303313);Milk yield (22281351 22303313);Milk yield (EBV) (22303313) |
| LGR4                       | 15:58873842-58977292   | H10 vs H70 | Milk fat yield (EBV) (22303313)                                                                                                                              |
| HIP1R                      | 17:54915865-54946127   | H10 vs H70 | Milk protein percentage (18218765);Milk yield (18218765)                                                                                                     |
| NDRG4                      | 18:26340550-26383749   | H10 vs H70 | Milk fat yield (EBV) (21198698);Milk protein yield (EBV) (21198698)                                                                                          |
| DEDD2                      | 18:51380782-51395993   | H10 vs H70 | Milk fat percentage (22281351);Milk protein percentage (22281351)                                                                                            |
| ENSBTAG00000006859         | 18:51735955-51789258   | H10 vs H70 | Milk protein percentage (22281351);Milk protein yield (EBV) (18650300)                                                                                       |
| CPD                        | 19:22025795-22086708   | H10 vs H70 | Milk fat yield (EBV) (18650300);Milk yield (EBV) (18650300)                                                                                                  |
| CCL8                       | 19:16137673-16139707   | H10 vs H70 | Milk protein yield (EBV) (17433017);Milk yield (EBV) (17433017)                                                                                              |
| BT.27564                   | 19:42877796-42888179   | H10 vs H70 | Milk protein percentage (22281351)                                                                                                                           |
| PTRF                       | 19:43148012-43162165   | H10 vs H70 | Milk protein percentage (22281351)                                                                                                                           |
| IFIH10                     | 2:34217172-34272473    | H10 vs H70 | Milk fat percentage (EBV) (21198698);Milk protein percentage (EBV) (21198698);Milk protein yield (EBV) (21198698);Milk yield (EBV) (21198698)                |
| SLC30A2                    | 2:127638450-127645772  | H10 vs H70 | Milk yield (18218765)                                                                                                                                        |
| BT.66847                   | 2:106877084-106940905  | H10 vs H70 | Milk yield (18218765)                                                                                                                                        |
| EXTL1                      | 2:127647570-127665188  | H10 vs H70 | Milk yield (18218765)                                                                                                                                        |

|              |                       |            |                                                                                                                                                                                                                                                                                                                                                                   |
|--------------|-----------------------|------------|-------------------------------------------------------------------------------------------------------------------------------------------------------------------------------------------------------------------------------------------------------------------------------------------------------------------------------------------------------------------|
| FYB          | 20:35176988-35347535  | H10 vs H70 | Milk fat yield (daughter deviation) (16751675);Milk protein percentage (daughter deviation) (16751675);Milk yield (daughter deviation) (16751675)                                                                                                                                                                                                                 |
| PRLR         | 20:38951596-39137480  | H10 vs H70 | Milk fat percentage (22281351);Milk protein percentage (EBV) (21048968);Milk protein yield (22281351);Milk yield (22281351)                                                                                                                                                                                                                                       |
| SLC38A3      | 22:50702768-50717581  | H10 vs H70 | Milk protein yield (daughter deviation) (20172245);Milk yield (daughter deviation) (20172245)                                                                                                                                                                                                                                                                     |
| SEMA3F       | 22:50733156-50769905  | H10 vs H70 | Milk protein yield (daughter deviation) (20172245);Milk yield (daughter deviation) (20172245)                                                                                                                                                                                                                                                                     |
| LTB          | 23:27529855-27531864  | H10 vs H70 | Milk protein percentage (18218765)                                                                                                                                                                                                                                                                                                                                |
| IER3         | 23:28088455-28089722  | H10 vs H70 | Milk protein percentage (18218765)                                                                                                                                                                                                                                                                                                                                |
| TNF          | 23:27533910-27536674  | H10 vs H70 | Milk protein percentage (18218765)                                                                                                                                                                                                                                                                                                                                |
| DDR1         | 23:27975618-27991748  | H10 vs H70 | Milk protein percentage (18218765)                                                                                                                                                                                                                                                                                                                                |
| CIDEA        | 24:43231406-43233297  | H10 vs H70 | Milk yield (23031427)                                                                                                                                                                                                                                                                                                                                             |
| NCF1         | 25:33267457-33282335  | H10 vs H70 | Milk protein percentage (21605784);Milk protein yield (EBV) (18650300)                                                                                                                                                                                                                                                                                            |
| DAGLB        | 25:38842843-38866581  | H10 vs H70 | Milk fat percentage (15377635);Milk protein yield (15377635);Milk yield (15377635)                                                                                                                                                                                                                                                                                |
| IFIT2        | 26:11064495-11071316  | H10 vs H70 | Milk fat percentage (EBV) (21198698);Milk fat yield (EBV) (21198698);Milk protein percentage (EBV) (21198698);Milk yield (EBV) (21198698)                                                                                                                                                                                                                         |
| IFIT1, IFIT3 | 26:11079573-11110084  | H10 vs H70 | Milk fat percentage (EBV) (21198698);Milk fat yield (EBV) (21198698);Milk protein percentage (EBV) (21198698);Milk yield (EBV) (21198698)                                                                                                                                                                                                                         |
| IFIT5        | 26:11117505-11127464  | H10 vs H70 | Milk fat percentage (EBV) (21198698);Milk fat yield (EBV) (21198698);Milk protein percentage (EBV) (21198698);Milk yield (EBV) (21198698)                                                                                                                                                                                                                         |
| TACC2        | 26:42274440-42485654  | H10 vs H70 | Milk yield (EBV) (18650300)                                                                                                                                                                                                                                                                                                                                       |
| KCNMA1       | 28:32807350-33587986  | H10 vs H70 | Milk fat yield (EBV) (18650300);Milk protein yield (EBV) (18650300);Milk yield (daughter deviation) (12487475)                                                                                                                                                                                                                                                    |
| MS4A8B       | 29:37622090-37654922  | H10 vs H70 | Milk fat percentage (22281351);Milk protein percentage (22281351)                                                                                                                                                                                                                                                                                                 |
| TBC1D10C     | 29:45942057-45947879  | H10 vs H70 | Milk fat percentage (20942903);Milk protein percentage (20942903)                                                                                                                                                                                                                                                                                                 |
| ALDH3B2      | 29:46143362-46150328  | H10 vs H70 | Milk fat percentage (20942903);Milk fat percentage (daughter deviation) (20822563);Milk fat yield (daughter deviation) (20822563);Milk protein percentage (19785908 20942903);Milk protein percentage (daughter deviation) (20822563);Milk protein yield (19785908);Milk protein yield (daughter deviation) (20822563);Milk yield (daughter deviation) (20822563) |
| S100A8       | 3:17146917-17147898   | H10 vs H70 | 305 days milk yield (22535401);Milk fat percentage (11015574);Milk fat yield (11015574);Milk protein percentage (11015574 12416823);Milk yield (11015574)                                                                                                                                                                                                         |
| MCOLN2       | 3:59286294-59351124   | H10 vs H70 | Milk fat yield (daughter deviation) (12487475)                                                                                                                                                                                                                                                                                                                    |
| HIVEP3       | 3:105213589-105268006 | H10 vs H70 | Milk protein yield (20855021);Milk yield (20855021)                                                                                                                                                                                                                                                                                                               |

|                              |                        |            |                                                                                                                                                           |
|------------------------------|------------------------|------------|-----------------------------------------------------------------------------------------------------------------------------------------------------------|
| S100A9                       | 3:17176216-17179005    | H10 vs H70 | 305 days milk yield (22535401);Milk fat percentage (11015574);Milk fat yield (11015574);Milk protein percentage (11015574 12416823);Milk yield (11015574) |
| SLC5A9                       | 3:98567048-98595504    | H10 vs H70 | Milk protein yield (EBV) (18650300)                                                                                                                       |
| BT.64791                     | 4:60940662-61125662    | H10 vs H70 | Milk yield (EBV) (18650300)                                                                                                                               |
| AGMO                         | 4:23499625-23891236    | H10 vs H70 | Milk protein percentage (9649542)                                                                                                                         |
| BT.89244, ENSBTAG00000047605 | 4:99787243-99950827    | H10 vs H70 | Average daily milk yield (18650297);Milk fat percentage (20670403);Milk protein percentage (20670403);Milk protein yield (20670403);Milk yield (20670403) |
| NELL2                        | 5:35656888-36042694    | H10 vs H70 | Milk yield (18298935)                                                                                                                                     |
| AGAP2                        | 5:56047710-56062903    | H10 vs H70 | Milk fat percentage (20812193);Milk fat yield (20812193);Milk protein percentage (20812193);Milk protein yield (20812193);Milk yield (20812193)           |
| TIMP3                        | 5:71475846-71926718    | H10 vs H70 | Milk fat yield (EBV) (21048968)                                                                                                                           |
| SCNN1A                       | 5:104364799-104396610  | H10 vs H70 | Milk protein yield (daughter deviation) (12487475)                                                                                                        |
| KIAA1467                     | 5:97259780-97299577    | H10 vs H70 | Milk fat percentage (11015574)                                                                                                                            |
| ABCG2                        | 6:37903128-38030583    | H10 vs H70 | Milk fat percentage (22486504);Milk protein percentage (22486504);Milk protein percentage (EBV) (21048968)                                                |
| IL-8                         | 6:90559881-90563647    | H10 vs H70 | Average daily milk yield (22614274)                                                                                                                       |
| CXCL2                        | 6:90695493-90697557    | H10 vs H70 | Average daily milk yield (22614274);Milk yield (18218765)                                                                                                 |
| CXCL2                        | 6:90811061-90824841    | H10 vs H70 | Average daily milk yield (22614274);Milk yield (18218765)                                                                                                 |
| HERC5                        | 6:37681999-37728536    | H10 vs H70 | Milk protein percentage (EBV) (21048968)                                                                                                                  |
| BT.64160                     | 7:19076009-19080237    | H10 vs H70 | Milk protein percentage (18218765);Milk yield (18218765)                                                                                                  |
| EMR1, EMR4P                  | 7:18709362-18834730    | H10 vs H70 | Milk protein percentage (18218765);Milk yield (18218765)                                                                                                  |
| FAM189A2                     | 8:45739649-45816965    | H10 vs H70 | Milk fat percentage (EBV) (21198698);Milk protein percentage (EBV) (21198698)                                                                             |
| CNTFR                        | 8:77260171-77299493    | H10 vs H70 | Milk yield (ECM) (23031337)                                                                                                                               |
| SLC28A3                      | 8:78871654-78944400    | H10 vs H70 | Milk yield (ECM) (23031337)                                                                                                                               |
| MB21D2                       | 1:75101341-75222153    | H10 vs L10 | Milk protein yield (daughter deviation) (12487475)                                                                                                        |
| TNIK                         | 1:96789066-97194010    | H10 vs L10 | Milk fat percentage (EBV) (21198698);Milk fat yield (EBV) (21198698);Milk protein yield (EBV) (21198698)                                                  |
| UBL5                         | 1:154150027-154150249  | H10 vs L10 | Milk protein percentage (22281351);Milk yield (daughter deviation) (12487475)                                                                             |
| BT.63066                     | 10:92624409-92637043   | H10 vs L10 | Milk protein percentage (18218765);Milk yield (18218765)                                                                                                  |
| MGC152281                    | 11:10196558-10203502   | H10 vs L10 | Milk protein percentage (18218765);Milk yield (18218765)                                                                                                  |
| SLC4A5                       | 11:10283281-10405985   | H10 vs L10 | Milk protein percentage (18218765);Milk yield (18218765)                                                                                                  |
| BT.100456                    | 11:92577650-92665089   | H10 vs L10 | Milk yield (18218765)                                                                                                                                     |
| BT.61865                     | 11:98793227-98797809   | H10 vs L10 | Milk yield (21750913)                                                                                                                                     |
| -                            | 11:106807826-106808485 | H10 vs L10 | Milk fat percentage (EBV) (21048968)                                                                                                                      |

|          |                        |            |                                                                                                                                                                              |
|----------|------------------------|------------|------------------------------------------------------------------------------------------------------------------------------------------------------------------------------|
| BT.88795 | 11:107260652-107261718 | H10 vs L10 | Milk fat percentage (EBV) (21048968)                                                                                                                                         |
| PTGES    | 11:100143652-100155090 | H10 vs L10 | Milk fat percentage (20200568 8056316);Milk protein yield (20655450);Milk yield (20655450 8056316)                                                                           |
| -        | 11:106803193-106806277 | H10 vs L10 | Milk fat percentage (EBV) (21048968)                                                                                                                                         |
| IFITM2   | 11:107191849-107203683 | H10 vs L10 | Milk fat percentage (EBV) (21048968)                                                                                                                                         |
| -        | 12:76666283-76681652   | H10 vs L10 | Milk fat yield (22281351)                                                                                                                                                    |
| -        | 12:76683161-76706797   | H10 vs L10 | Milk fat yield (22281351)                                                                                                                                                    |
| -        | 12:76711292-76740082   | H10 vs L10 | Milk fat yield (22281351)                                                                                                                                                    |
| PRKCQ    | 13:17032506-17185063   | H10 vs L10 | Milk protein percentage (18218765);Milk yield (18218765)                                                                                                                     |
| PARD3    | 13:18851193-19337608   | H10 vs L10 | Milk protein yield (EBV) (18650300)                                                                                                                                          |
| TGM2     | 13:67663137-67697607   | H10 vs L10 | Milk fat percentage (EBV) (21198698);Milk protein percentage (EBV) (21198698);Milk protein yield (EBV) (21198698);Milk yield (EBV) (21198698)                                |
| SLC45A4  | 14:3711836-3740304     | H10 vs L10 | Milk fat percentage (EBV) (21048968);Milk fat yield (EBV) (18650300);Milk yield (EBV) (21048968)                                                                             |
| SLA      | 14:9261889-9508938     | H10 vs L10 | Milk protein yield (EBV) (18650300);Milk yield (18218765);Milk yield (EBV) (18650300)                                                                                        |
| LYN      | 14:24847256-24932198   | H10 vs L10 | Milk protein yield (EBV) (21749477)                                                                                                                                          |
| LY6E     | 14:2624757-2628462     | H10 vs L10 | Milk fat percentage (12019241);Milk fat percentage (EBV) (21048968);Milk protein percentage (EBV) (21048968);Milk protein yield (EBV) (21048968);Milk yield (EBV) (21048968) |
| DENND3   | 14:3750705-3800766     | H10 vs L10 | Milk fat percentage (EBV) (21048968);Milk fat yield (EBV) (18650300);Milk yield (EBV) (21048968)                                                                             |
| -        | 14:16161543-16181355   | H10 vs L10 | Milk fat percentage (EBV) (21749477)                                                                                                                                         |
| TRIB1    | 14:16353387-16361545   | H10 vs L10 | Milk fat percentage (EBV) (21749477)                                                                                                                                         |
| PCMTD1   | 14:22639959-22717584   | H10 vs L10 | Milk fat percentage (EBV) (21749477)                                                                                                                                         |
| CA8      | 14:27637560-27719848   | H10 vs L10 | Milk protein yield (EBV) (21048968)                                                                                                                                          |
| TM7SF4   | 14:62215197-62463870   | H10 vs L10 | Milk fat yield (22281351);Milk protein yield (EBV) (21749477)                                                                                                                |
| SNTB1    | 14:84253918-84504093   | H10 vs L10 | Milk protein yield (daughter deviation) (12487475);Milk yield (18218765)                                                                                                     |
| NUP98    | 15:52097534-52183246   | H10 vs L10 | Milk protein percentage (21605784)                                                                                                                                           |
| MUC15    | 15:57913543-58130615   | H10 vs L10 | Milk fat yield (EBV) (22303313);Milk protein yield (22303313);Milk protein yield (EBV) (22303313);Milk yield (22281351 22303313);Milk yield (EBV) (22303313)                 |
| RILPL2   | 17:54425951-54457510   | H10 vs L10 | Milk protein percentage (18218765);Milk yield (18218765)                                                                                                                     |
| HIP1R    | 17:54915865-54946127   | H10 vs L10 | Milk protein percentage (18218765);Milk yield (18218765)                                                                                                                     |
| SDSL     | 17:63278103-63292006   | H10 vs L10 | Milk protein yield (12605852)                                                                                                                                                |
| NDRG4    | 18:26340550-26383749   | H10 vs L10 | Milk fat yield (EBV) (21198698);Milk protein yield (EBV) (21198698)                                                                                                          |
| ZNF507   | 18:43030188-43068295   | H10 vs L10 | Milk yield (18218765)                                                                                                                                                        |

|          |                       |            |                                                                                                                                                                                           |
|----------|-----------------------|------------|-------------------------------------------------------------------------------------------------------------------------------------------------------------------------------------------|
| DEDD2    | 18:51380782-51395993  | H10 vs L10 | Milk fat percentage (22281351);Milk protein percentage (22281351)                                                                                                                         |
| POU2F2   | 18:51467222-51497957  | H10 vs L10 | Milk fat percentage (22281351);Milk protein percentage (22281351)                                                                                                                         |
| CD79A    | 18:51679283-51682971  | H10 vs L10 | Milk protein percentage (22281351);Milk protein yield (EBV) (18650300)                                                                                                                    |
| DYNLL2   | 19:9118007-9125251    | H10 vs L10 | Milk fat yield (EBV) (18650300)                                                                                                                                                           |
| CPD      | 19:22025795-22086708  | H10 vs L10 | Milk fat yield (EBV) (18650300);Milk yield (EBV) (18650300)                                                                                                                               |
| GOSR1    | 19:22108501-22140940  | H10 vs L10 | Milk fat yield (EBV) (18650300);Milk yield (EBV) (18650300)                                                                                                                               |
| STAT5A   | 19:43033596-43054075  | H10 vs L10 | Milk protein percentage (22281351)                                                                                                                                                        |
| HSD17B1  | 19:43268325-43270819  | H10 vs L10 | Milk protein percentage (22281351)                                                                                                                                                        |
| BT.62349 | 19:8900989-8974286    | H10 vs L10 | Milk fat yield (EBV) (18650300)                                                                                                                                                           |
| CCL8     | 19:16137673-16139707  | H10 vs L10 | Milk protein yield (EBV) (17433017);Milk yield (EBV) (17433017)                                                                                                                           |
| -        | 19:22099346-22104985  | H10 vs L10 | Milk fat yield (EBV) (18650300);Milk yield (EBV) (18650300)                                                                                                                               |
| STAT3    | 19:43056659-43132624  | H10 vs L10 | Milk protein percentage (22281351)                                                                                                                                                        |
| PTRF     | 19:43148012-43162165  | H10 vs L10 | Milk protein percentage (22281351)                                                                                                                                                        |
| ICAM2    | 19:48857449-48889758  | H10 vs L10 | Milk protein percentage (18218765)                                                                                                                                                        |
| MSTN     | 2:6213565-6220196     | H10 vs L10 | Milk fat yield (21700058);Milk protein yield (21700058)                                                                                                                                   |
| CCDC141  | 2:17791921-18014475   | H10 vs L10 | Milk fat yield (daughter deviation) (12487475)                                                                                                                                            |
| IFIH10   | 2:34217172-34272473   | H10 vs L10 | Milk fat percentage (EBV) (21198698);Milk protein percentage (EBV) (21198698);Milk protein yield (EBV) (21198698);Milk yield (EBV) (21198698)                                             |
| FAP      | 2:34297725-34376828   | H10 vs L10 | Milk fat percentage (EBV) (21198698);Milk protein percentage (EBV) (21198698);Milk protein yield (EBV) (21198698);Milk yield (EBV) (21198698)                                             |
| BT.30256 | 2:86410859-86427846   | H10 vs L10 | Milk fat percentage (daughter deviation) (17033032);Milk protein percentage (daughter deviation) (17033032);Milk protein yield (17033032);Milk protein yield (EBV) (18650300)             |
| CYP27A1  | 2:107462686-107504968 | H10 vs L10 | Milk fat percentage (EBV) (21198698);Milk protein percentage (EBV) (21198698);Milk protein yield (EBV) (21198698);Milk yield (EBV) (21198698)                                             |
| SLC30A2  | 2:127638450-127645772 | H10 vs L10 | Milk yield (18218765)                                                                                                                                                                     |
| C2ORF80  | 2:96867886-96890885   | H10 vs L10 | Milk fat percentage (EBV) (21198698);Milk fat yield (EBV) (21198698);Milk protein percentage (EBV) (21198698);Milk protein yield (EBV) (21198698);Milk yield (EBV) (21198698)             |
| MAN1C1   | 2:127888645-128008111 | H10 vs L10 | Milk yield (18218765)                                                                                                                                                                     |
| BT.22214 | 20:12352170-12366624  | H10 vs L10 | Milk yield (ECM) (23031337)                                                                                                                                                               |
| BT.78334 | 20:33688290-33721667  | H10 vs L10 | Milk fat yield (22281351);Milk fat yield (daughter deviation) (16751675);Milk protein percentage (22281351);Milk protein percentage (daughter deviation) (16751675);Milk yield (22281351) |

|           |                      |            |                                                                                                                                                                                                                                      |
|-----------|----------------------|------------|--------------------------------------------------------------------------------------------------------------------------------------------------------------------------------------------------------------------------------------|
| TTC33     | 20:33721921-33747493 | H10 vs L10 | Milk fat yield (22281351);Milk fat yield (daughter deviation) (16751675);Milk protein percentage (22281351);Milk protein percentage (daughter deviation) (16751675);Milk yield (22281351)                                            |
| FYB       | 20:35176988-35347535 | H10 vs L10 | Milk fat yield (daughter deviation) (16751675);Milk protein percentage (daughter deviation) (16751675);Milk yield (daughter deviation) (16751675)                                                                                    |
| RICTOR    | 20:35376523-35514741 | H10 vs L10 | Milk fat percentage (daughter deviation) (16751675);Milk protein percentage (11768096);Milk protein percentage (EBV) (21048968);Milk protein percentage (daughter deviation) (16751675)                                              |
| PRLR      | 20:38951596-39137480 | H10 vs L10 | Milk fat percentage (22281351);Milk protein percentage (EBV) (21048968);Milk protein yield (22281351);Milk yield (22281351)                                                                                                          |
| SNX18     | 20:24564479-24596518 | H10 vs L10 | Milk fat percentage (20528848);Milk fat yield (daughter deviation) (20528848);Milk protein percentage (20528848);Milk protein yield (daughter deviation) (20528848);Milk yield (22281351);Milk yield (daughter deviation) (20528848) |
| BT.83070  | 20:26116746-26227530 | H10 vs L10 | Milk fat yield (22281351)                                                                                                                                                                                                            |
| RAI14     | 20:39352840-39515205 | H10 vs L10 | Milk fat percentage (22281351);Milk fat yield (22281351);Milk protein percentage (22281351);Milk protein percentage (EBV) (21048968);Milk protein yield (22281351);Milk yield (18218765 22281351)                                    |
| -         | 20:40431781-40435815 | H10 vs L10 | Milk protein percentage (22281351)                                                                                                                                                                                                   |
| WHAMM     | 21:23546101-23564527 | H10 vs L10 | Milk protein percentage (11290723 20942903)                                                                                                                                                                                          |
| MFGE8     | 21:20889912-20920858 | H10 vs L10 | Milk protein percentage (18218765)                                                                                                                                                                                                   |
| FSD2      | 21:23501905-23545813 | H10 vs L10 | Milk protein percentage (11290723 20942903)                                                                                                                                                                                          |
| HOMER2    | 21:23577845-23668524 | H10 vs L10 | Milk protein percentage (11290723 20942903)                                                                                                                                                                                          |
| TMF1      | 22:32610464-32640830 | H10 vs L10 | Milk protein percentage (12416823)                                                                                                                                                                                                   |
| CISH      | 22:50320204-50325617 | H10 vs L10 | Milk protein yield (daughter deviation) (20172245);Milk yield (daughter deviation) (20172245)                                                                                                                                        |
| BT.56096  | 22:50577798-50586504 | H10 vs L10 | Milk protein yield (daughter deviation) (20172245);Milk yield (daughter deviation) (20172245)                                                                                                                                        |
| BT.102977 | 22:12520392-12532806 | H10 vs L10 | Milk fat percentage (12416823)                                                                                                                                                                                                       |
| SEMA3B    | 22:50655647-50662413 | H10 vs L10 | Milk protein yield (daughter deviation) (20172245);Milk yield (daughter deviation) (20172245)                                                                                                                                        |
| SLC38A3   | 22:50702768-50717581 | H10 vs L10 | Milk protein yield (daughter deviation) (20172245);Milk yield (daughter deviation) (20172245)                                                                                                                                        |
| SEMA3F    | 22:50733156-50769905 | H10 vs L10 | Milk protein yield (daughter deviation) (20172245);Milk yield (daughter deviation) (20172245)                                                                                                                                        |
| VEGFA     | 23:17255946-17269998 | H10 vs L10 | Milk protein yield (EBV) (18650300)                                                                                                                                                                                                  |
| NOTCH4    | 23:26973190-27001754 | H10 vs L10 | 305 days milk yield (22155013);Milk fat percentage (22155013);Milk protein percentage (22155013)                                                                                                                                     |

|                 |                      |            |                                                                                                                                                   |
|-----------------|----------------------|------------|---------------------------------------------------------------------------------------------------------------------------------------------------|
| AGER            | 23:27008830-27011946 | H10 vs L10 | 305 days milk yield (22155013);Milk fat percentage (22155013);Milk protein percentage (22155013)                                                  |
| LTB             | 23:27529855-27531864 | H10 vs L10 | Milk protein percentage (18218765)                                                                                                                |
| MGC126945       | 23:27600054-27604052 | H10 vs L10 | Milk protein percentage (18218765)                                                                                                                |
| IER3            | 23:28088455-28089722 | H10 vs L10 | Milk protein percentage (18218765)                                                                                                                |
| MBOAT1          | 23:37498571-37614367 | H10 vs L10 | Milk protein percentage (22281351)                                                                                                                |
| NFKBIE, SLC35B2 | 23:17874862-17887291 | H10 vs L10 | Milk fat yield (22916942)                                                                                                                         |
| BT.105154       | 23:27175688-27196793 | H10 vs L10 | 305 days milk yield (22155013);Milk fat percentage (22155013);Milk protein percentage (22155013)                                                  |
| SNORD52         | 23:27325037-27326174 | H10 vs L10 | 305 days milk yield (22155013);Milk fat percentage (22155013);Milk protein percentage (18218765 22155013)                                         |
| -               | 23:27524517-27527023 | H10 vs L10 | Milk protein percentage (18218765)                                                                                                                |
| CYB5A           | 24:4413367-4445873   | H10 vs L10 | Milk fat percentage (EBV) (19841231);Milk protein yield (EBV) (19841231)                                                                          |
| TGIF1           | 24:37940261-37948732 | H10 vs L10 | Milk protein percentage (18218765)                                                                                                                |
| BT.101003       | 24:43111843-43163936 | H10 vs L10 | Milk yield (23031427)                                                                                                                             |
| RIOK3           | 24:33523339-33545584 | H10 vs L10 | Milk fat percentage (EBV) (21198698);Milk fat yield (EBV) (21198698);Milk protein percentage (EBV) (21198698);Milk protein yield (EBV) (21198698) |
| CIDEA           | 24:43231406-43233297 | H10 vs L10 | Milk yield (23031427)                                                                                                                             |
| CPPED1          | 25:11462166-11602915 | H10 vs L10 | Milk protein yield (23031427)                                                                                                                     |
| NCF1            | 25:33267457-33282335 | H10 vs L10 | Milk protein percentage (21605784);Milk protein yield (EBV) (18650300)                                                                            |
| DAGLB           | 25:38842843-38866581 | H10 vs L10 | Milk fat percentage (15377635);Milk protein yield (15377635);Milk yield (15377635)                                                                |
| SLC16A12        | 26:11141010-11169619 | H10 vs L10 | Milk fat percentage (EBV) (21198698);Milk fat yield (EBV) (21198698);Milk protein percentage (EBV) (21198698);Milk yield (EBV) (21198698)         |
| AP3M2           | 27:36716828-36734481 | H10 vs L10 | Milk protein percentage (18218765);Milk yield (18218765)                                                                                          |
| IKBKB           | 27:36813158-36865778 | H10 vs L10 | Milk protein percentage (18218765);Milk yield (18218765)                                                                                          |
| POLB            | 27:36877979-36902798 | H10 vs L10 | Milk protein percentage (18218765);Milk yield (18218765)                                                                                          |
| VDAC5P          | 27:36921285-36933273 | H10 vs L10 | Milk protein percentage (18218765);Milk yield (18218765)                                                                                          |
| ARID5B          | 28:18003693-18191994 | H10 vs L10 | Milk fat percentage (EBV) (21198698);Milk protein percentage (EBV) (21198698);Milk protein yield (EBV) (21198698);Milk yield (EBV) (21198698)     |
| PPIF            | 28:35167544-35173642 | H10 vs L10 | Milk protein percentage (18218765);Milk yield (18218765)                                                                                          |
| PPA1            | 28:26576201-26614511 | H10 vs L10 | Milk protein yield (EBV) (18650300)                                                                                                               |
| -               | 29:44297409-44299689 | H10 vs L10 | Milk protein percentage (21605784)                                                                                                                |

|          |                       |            |                                                                                                                                                                                                                                                                                                                                                                   |
|----------|-----------------------|------------|-------------------------------------------------------------------------------------------------------------------------------------------------------------------------------------------------------------------------------------------------------------------------------------------------------------------------------------------------------------------|
| -        | 29:46717120-46717697  | H10 vs L10 | Milk fat percentage (daughter deviation) (20822563);Milk fat yield (daughter deviation) (20822563);Milk protein percentage (19785908);Milk protein percentage (daughter deviation) (20822563);Milk protein yield (19785908);Milk protein yield (daughter deviation) (20822563);Milk yield (daughter deviation) (20822563)                                         |
| CLCF1    | 29:45910396-45912701  | H10 vs L10 | Milk fat percentage (20942903);Milk protein percentage (20942903)                                                                                                                                                                                                                                                                                                 |
| ALDH3B2  | 29:46143362-46150328  | H10 vs L10 | Milk fat percentage (20942903);Milk fat percentage (daughter deviation) (20822563);Milk fat yield (daughter deviation) (20822563);Milk protein percentage (19785908 20942903);Milk protein percentage (daughter deviation) (20822563);Milk protein yield (19785908);Milk protein yield (daughter deviation) (20822563);Milk yield (daughter deviation) (20822563) |
| CHKA     | 29:46225619-46281621  | H10 vs L10 | Milk fat percentage (20942903);Milk fat percentage (daughter deviation) (20822563);Milk fat yield (daughter deviation) (20822563);Milk protein percentage (19785908 20942903);Milk protein percentage (daughter deviation) (20822563);Milk protein yield (19785908);Milk protein yield (daughter deviation) (20822563);Milk yield (daughter deviation) (20822563) |
| BT.30964 | 29:46315559-46381073  | H10 vs L10 | Milk fat percentage (20942903);Milk fat percentage (daughter deviation) (20822563);Milk fat yield (daughter deviation) (20822563);Milk protein percentage (19785908 20942903);Milk protein percentage (daughter deviation) (20822563);Milk protein yield (19785908);Milk protein yield (daughter deviation) (20822563);Milk yield (daughter deviation) (20822563) |
| S100A8   | 3:17146917-17147898   | H10 vs L10 | 305 days milk yield (22535401);Milk fat percentage (11015574);Milk fat yield (11015574);Milk protein percentage (11015574 12416823);Milk yield (11015574)                                                                                                                                                                                                         |
| BT.76892 | 3:20656592-20712080   | H10 vs L10 | Milk protein percentage (daughter deviation) (14762092)                                                                                                                                                                                                                                                                                                           |
| BT.24012 | 3:55063829-55085745   | H10 vs L10 | Milk protein percentage (18218765);Milk yield (18218765)                                                                                                                                                                                                                                                                                                          |
| BT.39806 | 3:55179368-55210377   | H10 vs L10 | Milk protein percentage (18218765);Milk yield (18218765)                                                                                                                                                                                                                                                                                                          |
| MCOLN2   | 3:59286294-59351124   | H10 vs L10 | Milk fat yield (daughter deviation) (12487475)                                                                                                                                                                                                                                                                                                                    |
| LPAR3    | 3:59377051-59459794   | H10 vs L10 | Milk protein percentage (9649542);Milk yield (daughter deviation) (14762092)                                                                                                                                                                                                                                                                                      |
| BT.42861 | 3:98370382-98536867   | H10 vs L10 | Milk protein yield (EBV) (18650300)                                                                                                                                                                                                                                                                                                                               |
| HIVEP3   | 3:105213589-105268006 | H10 vs L10 | Milk protein yield (20855021);Milk yield (20855021)                                                                                                                                                                                                                                                                                                               |
| C1ORF51  | 3:20400968-20404346   | H10 vs L10 | Milk protein percentage (daughter deviation) (14762092)                                                                                                                                                                                                                                                                                                           |
| BT.64791 | 4:60940662-61125662   | H10 vs L10 | Milk yield (EBV) (18650300)                                                                                                                                                                                                                                                                                                                                       |
| TMEM140  | 4:99699887-99719088   | H10 vs L10 | Average daily milk yield (18650297);Milk fat percentage (20670403);Milk protein percentage (20670403);Milk protein yield (20670403);Milk yield (20670403)                                                                                                                                                                                                         |



|                    |                       |            |                                                                                                                                                                               |
|--------------------|-----------------------|------------|-------------------------------------------------------------------------------------------------------------------------------------------------------------------------------|
| C4H7orf41          | 4:66610954-66643765   | H10 vs L10 | Milk fat percentage (EBV) (21198698);Milk fat yield (EBV) (21198698);Milk protein percentage (EBV) (21198698);Milk protein yield (EBV) (21198698)                             |
| JHDM1D             | 4:104370183-104520655 | H10 vs L10 | Milk fat percentage (EBV) (21198698);Milk protein percentage (EBV) (21198698);Milk protein yield (EBV) (21198698);Milk yield (EBV) (21198698)                                 |
| BT.61412           | 5:32550520-32606144   | H10 vs L10 | Milk fat percentage (22281351);Milk protein yield (22281351);Milk yield (22281351)                                                                                            |
| NELL2              | 5:35656888-36042694   | H10 vs L10 | Milk yield (18298935)                                                                                                                                                         |
| AVIL               | 5:55983553-56002079   | H10 vs L10 | Milk fat percentage (20812193);Milk fat yield (20812193);Milk protein percentage (20812193);Milk protein yield (20812193);Milk yield (20812193)                               |
| TIMP3              | 5:71475846-71926718   | H10 vs L10 | Milk fat yield (EBV) (21048968)                                                                                                                                               |
| NCF4               | 5:75641216-75659769   | H10 vs L10 | Milk protein percentage (EBV) (21048968)                                                                                                                                      |
| CSF2RB             | 5:75724562-75745890   | H10 vs L10 | Milk protein percentage (EBV) (21048968)                                                                                                                                      |
| ACRBP              | 5:104153957-104161646 | H10 vs L10 | Milk protein yield (daughter deviation) (12487475)                                                                                                                            |
| LPAR5              | 5:104163206-104173568 | H10 vs L10 | Milk protein yield (daughter deviation) (12487475)                                                                                                                            |
| SCNN1A             | 5:104364799-104396610 | H10 vs L10 | Milk protein yield (daughter deviation) (12487475)                                                                                                                            |
| VWF                | 5:104603431-104727301 | H10 vs L10 | Milk protein yield (daughter deviation) (12487475)                                                                                                                            |
| SLC48A1            | 5:32630915-32676306   | H10 vs L10 | Milk fat percentage (22281351);Milk protein yield (22281351);Milk yield (22281351)                                                                                            |
| FAM113B            | 5:33141573-33339728   | H10 vs L10 | Milk fat yield (23031427);Milk yield (23031427)                                                                                                                               |
| SLC16A7            | 5:53987908-54214799   | H10 vs L10 | 305 days milk yield (21948746);Milk fat yield (21948746);Milk protein yield (21948746)                                                                                        |
| FOXRED2            | 5:75275059-75293236   | H10 vs L10 | Milk yield (ECM) (23031337)                                                                                                                                                   |
| PIK3C2G            | 5:91835145-92300259   | H10 vs L10 | Milk protein percentage (21605784)                                                                                                                                            |
| APOLD1             | 5:97520909-97526540   | H10 vs L10 | Milk fat percentage (11015574)                                                                                                                                                |
| GABARAPL10         | 5:100205185-100215034 | H10 vs L10 | Milk fat percentage (EBV) (21198698);Milk fat yield (EBV) (21198698);Milk protein percentage (EBV) (21198698);Milk protein yield (EBV) (21198698);Milk yield (EBV) (21198698) |
| BT.98677           | 5:104273437-104300410 | H10 vs L10 | Milk protein yield (daughter deviation) (12487475)                                                                                                                            |
| ENSBTAG00000003367 | 5:114966365-115060319 | H10 vs L10 | Milk fat yield (15377635)                                                                                                                                                     |
| ABCG2              | 6:37903128-38030583   | H10 vs L10 | Milk fat percentage (22486504);Milk protein percentage (22486504);Milk protein percentage (EBV) (21048968)                                                                    |
| BT.22022           | 6:58486539-58565108   | H10 vs L10 | Milk protein percentage (18218765);Milk protein yield (19603057);Milk yield (19603057)                                                                                        |
| IL-8               | 6:90559881-90563647   | H10 vs L10 | Average daily milk yield (22614274)                                                                                                                                           |
| CXCL6              | 6:90645963-90648076   | H10 vs L10 | Average daily milk yield (22614274)                                                                                                                                           |
| CXCL2              | 6:90695493-90697557   | H10 vs L10 | Average daily milk yield (22614274);Milk yield (18218765)                                                                                                                     |
| CXCL2              | 6:90811061-90824841   | H10 vs L10 | Average daily milk yield (22614274);Milk yield (18218765)                                                                                                                     |

|             |                       |            |                                                                                                                                              |
|-------------|-----------------------|------------|----------------------------------------------------------------------------------------------------------------------------------------------|
| HERC5       | 6:37681999-37728536   | H10 vs L10 | Milk protein percentage (EBV) (21048968)                                                                                                     |
| HERC6       | 6:37736092-37793279   | H10 vs L10 | Milk protein percentage (EBV) (21048968)                                                                                                     |
| RELL10      | 6:58565924-58660258   | H10 vs L10 | Milk protein percentage (18218765);Milk protein yield (19603057);Milk yield (19603057)                                                       |
| RASSF6      | 6:90373216-90429759   | H10 vs L10 | Average daily milk yield (22614274)                                                                                                          |
| ANTXR2      | 6:96346731-96526016   | H10 vs L10 | Milk protein percentage (18218765)                                                                                                           |
| PRKG2       | 6:97652568-9775756    | H10 vs L10 | Milk yield (ECM) (23031337)                                                                                                                  |
| RASGEF1B    | 6:97967085-98026691   | H10 vs L10 | Milk yield (ECM) (23031337)                                                                                                                  |
| TAPT1       | 6:116194012-116241336 | H10 vs L10 | Milk protein percentage (15377635);Milk protein yield (15377635);Milk protein yield (daughter deviation) (11167525)                          |
| HOOK2       | 7:13862727-13874728   | H10 vs L10 | Milk fat percentage (18218768);Milk fat yield (18218768);Milk protein yield (18218768)                                                       |
| BT.64160    | 7:19076009-19080237   | H10 vs L10 | Milk protein percentage (18218765);Milk yield (18218765)                                                                                     |
| SAFB2       | 7:19908340-19936959   | H10 vs L10 | Milk fat yield (9891277)                                                                                                                     |
| CEP120      | 7:31688461-31774451   | H10 vs L10 | Milk fat yield (daughter deviation) (21054834);Milk protein yield (daughter deviation) (21054834);Milk yield (daughter deviation) (21054834) |
| MGC128424   | 7:64133811-64153713   | H10 vs L10 | Milk protein percentage (12416823)                                                                                                           |
| GPX3        | 7:64286947-64295116   | H10 vs L10 | Milk protein percentage (12416823)                                                                                                           |
| NFIX        | 7:13592199-13685027   | H10 vs L10 | Milk fat percentage (18218768);Milk fat yield (18218768);Milk protein yield (18218768)                                                       |
| JUNB        | 7:13851130-13852933   | H10 vs L10 | Milk fat percentage (18218768);Milk fat yield (18218768);Milk protein yield (18218768)                                                       |
| EMR1, EMR4P | 7:18709362-18834730   | H10 vs L10 | Milk protein percentage (18218765);Milk yield (18218765)                                                                                     |
| VAV1        | 7:18866560-18937070   | H10 vs L10 | Milk protein percentage (18218765);Milk yield (18218765)                                                                                     |
| TRIP10      | 7:18967188-18970399   | H10 vs L10 | Milk protein percentage (18218765);Milk yield (18218765)                                                                                     |
| BT.89338    | 7:64054327-64065549   | H10 vs L10 | Milk protein percentage (12416823)                                                                                                           |
| TNIP1       | 7:64295656-64339418   | H10 vs L10 | Milk protein percentage (12416823)                                                                                                           |
| BT.91925    | 8:29860275-30155742   | H10 vs L10 | Milk fat percentage (EBV) (21048968)                                                                                                         |
| BT.29711    | 8:45568974-45696886   | H10 vs L10 | Milk fat percentage (EBV) (21198698);Milk protein percentage (EBV) (21198698)                                                                |
| FAM189A2    | 8:45739649-45816965   | H10 vs L10 | Milk fat percentage (EBV) (21198698);Milk protein percentage (EBV) (21198698)                                                                |
| SLC28A3     | 8:78871654-78944400   | H10 vs L10 | Milk yield (ECM) (23031337)                                                                                                                  |
| ZCCHC6      | 8:80842964-80900965   | H10 vs L10 | Milk protein yield (EBV) (18650300)                                                                                                          |
| -           | 14:16304446-16310988  | H70 vs L70 | Milk fat percentage (EBV) (21749477)                                                                                                         |
| MSTN        | 2:6213565-6220196     | H70 vs L70 | Milk fat yield (21700058);Milk protein yield (21700058)                                                                                      |
| LTB         | 23:27529855-27531864  | H70 vs L70 | Milk protein percentage (18218765)                                                                                                           |

|                  |                      |            |                                                                                                                                                           |
|------------------|----------------------|------------|-----------------------------------------------------------------------------------------------------------------------------------------------------------|
| BT.64791         | 4:60940662-61125662  | H70 vs L70 | Milk yield (EBV) (18650300)                                                                                                                               |
| SLC45A4          | 14:3711836-3740304   | L10 vs L70 | Milk fat percentage (EBV) (21048968);Milk fat yield (EBV) (18650300);Milk yield (EBV) (21048968)                                                          |
| -                | 14:3740839-3741290   | L10 vs L70 | Milk fat percentage (EBV) (21048968);Milk fat yield (EBV) (18650300);Milk yield (EBV) (21048968)                                                          |
| SLA              | 14:9261889-9508938   | L10 vs L70 | Milk protein yield (EBV) (18650300);Milk yield (18218765);Milk yield (EBV) (18650300)                                                                     |
| BT.44982BT.91045 | 15:52255759-52271899 | L10 vs L70 | Milk protein percentage (21605784)                                                                                                                        |
| KREMEN1          | 17:70551640-70601539 | L10 vs L70 | Milk protein percentage (18218765);Milk yield (18218765)                                                                                                  |
| HIP1R            | 17:54915865-54946127 | L10 vs L70 | Milk protein percentage (18218765);Milk yield (18218765)                                                                                                  |
| DEDD2            | 18:51380782-51395993 | L10 vs L70 | Milk fat percentage (22281351);Milk protein percentage (22281351)                                                                                         |
| CPD              | 19:22025795-22086708 | L10 vs L70 | Milk fat yield (EBV) (18650300);Milk yield (EBV) (18650300)                                                                                               |
| -                | 19:22099346-22104985 | L10 vs L70 | Milk fat yield (EBV) (18650300);Milk yield (EBV) (18650300)                                                                                               |
| -                | 22:50382529-50388265 | L10 vs L70 | Milk protein yield (daughter deviation) (20172245);Milk yield (daughter deviation) (20172245)                                                             |
| BT.102977        | 22:12520392-12532806 | L10 vs L70 | Milk fat percentage (12416823)                                                                                                                            |
| HSPA1A           | 23:27326253-27333698 | L10 vs L70 | 305 days milk yield (22155013);Milk fat percentage (22155013);Milk protein percentage (18218765 22155013)                                                 |
| KCNMA1           | 28:32807350-33587986 | L10 vs L70 | Milk fat yield (EBV) (18650300);Milk protein yield (EBV) (18650300);Milk yield (daughter deviation) (12487475)                                            |
| TBC1D10C         | 29:45942057-45947879 | L10 vs L70 | Milk fat percentage (20942903);Milk protein percentage (20942903)                                                                                         |
| S100A8           | 3:17146917-17147898  | L10 vs L70 | 305 days milk yield (22535401);Milk fat percentage (11015574);Milk fat yield (11015574);Milk protein percentage (11015574 12416823);Milk yield (11015574) |
| S100A9           | 3:17176216-17179005  | L10 vs L70 | 305 days milk yield (22535401);Milk fat percentage (11015574);Milk fat yield (11015574);Milk protein percentage (11015574 12416823);Milk yield (11015574) |
| SLC5A9           | 3:98567048-98595504  | L10 vs L70 | Milk protein yield (EBV) (18650300)                                                                                                                       |
| AVIL             | 5:55983553-56002079  | L10 vs L70 | Milk fat percentage (20812193);Milk fat yield (20812193);Milk protein percentage (20812193);Milk protein yield (20812193);Milk yield (20812193)           |
| AGAP2            | 5:56047710-56062903  | L10 vs L70 | Milk fat percentage (20812193);Milk fat yield (20812193);Milk protein percentage (20812193);Milk protein yield (20812193);Milk yield (20812193)           |
| FAM113B          | 5:33141573-33339728  | L10 vs L70 | Milk fat yield (23031427);Milk yield (23031427)                                                                                                           |
| PPARGC1A         | 6:44854112-44960668  | L10 vs L70 | Milk protein yield (22486504);Milk yield (22486504)                                                                                                       |
| EMR1, EMR4P      | 7:18709362-18834730  | L10 vs L70 | Milk protein percentage (18218765);Milk yield (18218765)                                                                                                  |
